# Supplementary material for: Insight into cordycepin biosynthesis of Cordyceps militaris: Comparison between a liquid surface culture and a submerged culture through transcriptomic analysis
Source: PLoS One. 2017 Nov 1;12(11):e0187052. doi: 10.1371/journal.pone.0187052 (PMC5665525; doi:10.1371/journal.pone.0187052)
Supplement: S4 Table — (XLSX) [file pone.0187052.s009.xlsx]

## Sheet: S1
id	logFC	logCPM	PValue	FDR	SM_1	SM_2	SM_3	ST_1	ST_2	ST_3	NCBInr	E-value	ID	Up/Down
TRINITY_DN7224_c0_g5	16.3431	11.1567	3.39747e-09	3.23586e-07	0	0	0	3085.27	0	5579.59	.	.	.
TRINITY_DN11108_c0_g1	13.0881	7.90584	1.46826e-35	1.29354e-31	0.047	0.058	0.01	187.954	379.715	519.347	serine protease [Cordyceps militaris CM01]	0	gi|573976826|ref|XP_006666358.1|	Up
TRINITY_DN9134_c0_g10	12.6187	7.43735	6.51687e-05	0.00173455	0.142	0.144	0.135	0.067	0.136	1568.12	hypothetical protein CCM_00871 [Cordyceps militaris CM01]	1e-13	gi|573976296|ref|XP_006666093.1|	Up
TRINITY_DN10395_c0_g3	12.5355	7.35537	7.60881e-32	3.35168e-28	0	0	0	388.698	1011.96	1075.87	protein kinase domain protein [Cordyceps militaris CM01]	3e-59	gi|573991495|ref|XP_006673668.1|	Up
TRINITY_DN10395_c0_g5	12.3694	7.18998	2.05616e-25	2.58783e-22	0	0	0	214.498	1094.2	894.257	protein kinase domain protein [Cordyceps militaris CM01]	3e-59	gi|573991495|ref|XP_006673668.1|	Up
TRINITY_DN10395_c0_g2	12.0772	6.89935	3.61119e-22	2.89223e-19	0	0	0	152.885	1078.63	572.709	protein kinase domain protein [Cordyceps militaris CM01]	3e-59	gi|573991495|ref|XP_006673668.1|	Up
TRINITY_DN6416_c0_g3	11.8097	6.63364	4.4756e-08	3.2722e-06	0	0	0	130.805	0	349.861	conserved lysine-rich protein, putative [Cordyceps militaris CM01]	5e-143	gi|573985399|ref|XP_006670620.1|	Up
TRINITY_DN10395_c0_g7	11.7316	6.55548	3.95249e-08	2.92617e-06	0	0	0	0	660.624	765.122	protein kinase domain protein [Cordyceps militaris CM01]	3e-59	gi|573991495|ref|XP_006673668.1|	Up
TRINITY_DN9111_c0_g8	11.7026	6.52705	8.26733e-05	0.00210202	0	0	0	0	563.498	0	woronin body major protein [Cordyceps militaris CM01]	0	gi|573981277|ref|XP_006668559.1|	Up
TRINITY_DN6416_c0_g7	11.6585	6.48322	8.35413e-05	0.00211798	0	0	0	0	430.585	0	conserved lysine-rich protein, putative [Cordyceps militaris CM01]	5e-143	gi|573985399|ref|XP_006670620.1|	Up
TRINITY_DN10995_c0_g5	11.5784	6.40541	2.96504e-08	2.26671e-06	0	0	0	217.184	241.197	0	elongation factor 1-alpha [Cordyceps militaris CM01]	0	gi|573976172|ref|XP_006666031.1|	Up
TRINITY_DN9295_c0_g1	11.5541	8.16613	2.19333e-13	4.44212e-11	0	0	0.513	16.029	928.299	1399.24	hypothetical protein CCM_01955 [Cordyceps militaris CM01]	5e-83	gi|573978454|ref|XP_006667172.1|	Up
TRINITY_DN7267_c0_g1	11.4306	6.26109	7.23607e-06	0.000272435	0.057	0.048	0.029	207.731	0	1.301	RNA-dependent RNA polymerase domain containing protein [Haemonchus contortus]	3e-48	gi|560138591|emb|CDJ82925.1|	Up
TRINITY_DN8590_c0_g1	11.301	6.12832	4.11824e-08	3.03612e-06	0	0	0	9.654	15.259	844.296	hypothetical protein CCM_09602 [Cordyceps militaris CM01]	2e-100	gi|573993755|ref|XP_006674798.1|	Up
TRINITY_DN11289_c0_g1	11.2858	8.69015	1.41835e-44	2.49913e-40	1.152	0	1.055	1865.23	2093.17	2974.33	hypothetical protein AFLA_000610 [Aspergillus flavus NRRL3357]	7e-15	gi|238502059|ref|XP_002382263.1|	Up
TRINITY_DN11041_c0_g6	11.2562	6.08473	0.000101558	0.00249576	0	0.01	0.01	0.01	725.771	0	40S ribosomal protein S14 [Cordyceps militaris CM01]	8e-92	gi|573977764|ref|XP_006666827.1|	Up
TRINITY_DN10995_c0_g10	11.2545	6.083	0.000101983	0.00250271	0.085	0.038	0.087	0.086	365.072	0.046	elongation factor 1-alpha [Cordyceps militaris CM01]	0	gi|573976172|ref|XP_006666031.1|	Up
TRINITY_DN8317_c0_g1	11.1732	6.00305	2.85325e-12	4.74285e-10	0	0	0	41.97	657.858	60.402	mannose-6-phosphate isomerase, class I [Cordyceps militaris CM01]	5e-80	gi|573993837|ref|XP_006674839.1|	Up
TRINITY_DN8317_c0_g4	11.1344	5.96424	0.000109392	0.00263446	0	0	0	0	738.264	0	mannose-6-phosphate isomerase, class I [Cordyceps militaris CM01]	5e-80	gi|573993837|ref|XP_006674839.1|	Up
TRINITY_DN10395_c0_g1	11.0964	9.37261	3.55479e-15	1.02681e-12	1.048	1.231	1.925	88.443	6134.37	3907.97	protein kinase domain protein [Cordyceps militaris CM01]	3e-59	gi|573991495|ref|XP_006673668.1|	Up
TRINITY_DN7224_c0_g2	11.0242	5.86046	9.72956e-05	0.00240105	0	0	0	217.375	0	0.023	.	.	.
TRINITY_DN10395_c0_g6	10.9145	5.74861	2.79103e-21	1.96712e-18	0	0	0	278.099	415.263	109.804	protein kinase domain protein [Cordyceps militaris CM01]	3e-59	gi|573991495|ref|XP_006673668.1|	Up
TRINITY_DN9087_c0_g3	10.8896	5.72493	9.3901e-08	6.33921e-06	0	0	0	34.62	0	27.822	1-phosphatidylinositol-3-phosphate 5-kinase (Fab1) [Cordyceps militaris CM01]	0	gi|573989767|ref|XP_006672804.1|	Up
TRINITY_DN7224_c0_g8	10.8788	5.71052	0.00014048	0.00321881	0	0	0	0	0	195.62	.	.	.
TRINITY_DN7267_c0_g2	10.8031	5.63723	0.000138849	0.00319437	0	0	0	0	134.114	0	RNA-dependent RNA polymerase domain containing protein [Haemonchus contortus]	3e-48	gi|560138591|emb|CDJ82925.1|	Up
TRINITY_DN4747_c0_g2	10.8	5.63465	4.62895e-13	8.78082e-11	0	0	0	14.175	222.316	56.465	methoxy mycolic acid synthase 1 [Cordyceps militaris CM01]	0	gi|573975396|ref|XP_006665643.1|	Up
TRINITY_DN3178_c0_g1	10.761	5.60184	0.000117809	0.00279379	0	0	0	124.831	0	0	nucleoside diphosphatase (Ynd1), putative [Cordyceps militaris CM01]	0	gi|573975438|ref|XP_006665664.1|	Up
TRINITY_DN7449_c0_g2	10.7547	5.59563	0.000118559	0.00280128	0.066	0.058	0.068	420.775	0	0.011	cytoplasmic ribosomal protein subunit S3 [Cordyceps militaris CM01]	2e-166	gi|573989369|ref|XP_006672605.1|	Up
TRINITY_DN11008_c0_g1	10.6544	9.66621	1.86322e-12	3.12666e-10	2.701	1.058	2.477	32.154	3611.39	7007.42	hypothetical protein CCM_06117 [Cordyceps militaris CM01]	1e-63	gi|573986801|ref|XP_006671321.1|	Up
TRINITY_DN11147_c0_g1	10.5188	10.7014	1.12759e-19	5.67659e-17	1.53	2.24	2.467	229.485	5808.21	3229.32	.	.	.
TRINITY_DN7331_c0_g5	10.3496	5.19147	0.000223129	0.00475973	0	0	0	0	417.862	0	60S ribosomal protein L10a [Cordyceps militaris CM01]	5e-142	gi|573979882|ref|XP_006667886.1|	Up
TRINITY_DN6310_c0_g12	10.292	5.13746	8.62284e-19	3.79836e-16	0	0	0	86.847	89.048	41.253	speract/scavenger receptor domain-containing protein [Cordyceps militaris CM01]	2e-61	gi|573975136|ref|XP_006665513.1|	Up
TRINITY_DN10395_c0_g10	10.1667	5.01174	7.33156e-07	3.78833e-05	0	0	0	0	228.505	251.377	protein kinase domain protein [Cordyceps militaris CM01]	3e-59	gi|573991495|ref|XP_006673668.1|	Up
TRINITY_DN10395_c0_g11	10.165	5.00944	1.7749e-06	8.0189e-05	0	0	0	0	91.605	384.05	protein kinase domain protein [Cordyceps militaris CM01]	3e-59	gi|573991495|ref|XP_006673668.1|	Up
TRINITY_DN6174_c0_g10	10.1496	4.99487	8.28969e-07	4.22151e-05	0	0	0	0	44.054	56.83	glycogen phosphorylase [Cordyceps militaris CM01]	0	gi|573982977|ref|XP_006669409.1|	Up
TRINITY_DN9111_c0_g9	10.0949	4.94114	1.51e-06	7.00161e-05	0	0	0	0	49.826	135.138	woronin body major protein [Cordyceps militaris CM01]	0	gi|573981277|ref|XP_006668559.1|	Up
TRINITY_DN9111_c0_g1	10.053	4.90145	0.000311782	0.00622168	0.066	0	0	0	178.951	0	woronin body major protein [Cordyceps militaris CM01]	0	gi|573981277|ref|XP_006668559.1|	Up
TRINITY_DN9950_c0_g4	10.0005	4.85284	4.26491e-18	1.7079e-15	0	0	0	33.12	37.677	28.495	heat shock protein 78 [Cordyceps militaris CM01]	0	gi|573986357|ref|XP_006671099.1|	Up
TRINITY_DN2629_c0_g2	9.99957	4.85296	9.03935e-16	2.89588e-13	0	0	0	59.137	24.318	25.893	hypothetical protein CCM_08139 [Cordyceps militaris CM01]	2e-51	gi|573990841|ref|XP_006673341.1|	Up
TRINITY_DN10995_c0_g6	9.95323	4.80423	0.000347718	0.00672535	0	0	0	0	147.807	0	elongation factor 1-alpha [Cordyceps militaris CM01]	0	gi|573976172|ref|XP_006666031.1|	Up
TRINITY_DN2026_c0_g2	9.89089	4.74536	3.24305e-15	9.52374e-13	0	0	0	7.475	19.58	17.049	canalicular multispecific organic anion transporter 1 [Cordyceps militaris CM01]	0	gi|573986841|ref|XP_006671341.1|	Up
TRINITY_DN4735_c0_g2	9.84898	4.71099	3.13861e-06	0.000129514	0	0	0	46.224	11.199	0	decapping enzyme Dcp2, putative [Cordyceps militaris CM01]	0	gi|573988013|ref|XP_006671927.1|	Up
TRINITY_DN5675_c0_g2	9.79074	4.65105	4.6013e-10	5.29902e-08	0	0	0	82.89	5.73	54.97	alcohol dehydrogenase, putative [Cordyceps militaris CM01]	0	gi|573991087|ref|XP_006673464.1|	Up
TRINITY_DN8692_c0_g1	9.72624	6.40637	9.48228e-10	1.03775e-07	0	1.452	0	1418.41	41.08	62.125	Hydrophobin 2 [Cordyceps militaris CM01]	7e-48	gi|573988269|ref|XP_006672055.1|	Up
TRINITY_DN5815_c0_g1	9.70679	4.56868	2.51552e-14	6.0717e-12	0.009	0.01	0.01	59.758	51.986	24.318	unnamed protein product [Penicillium roqueforti FM164]	4e-89	gi|584407267|emb|CDM37577.1|	Up
TRINITY_DN10395_c0_g9	9.70499	4.5631	0.000467744	0.00863	0	0	0	0	349.354	0	protein kinase domain protein [Cordyceps militaris CM01]	3e-59	gi|573991495|ref|XP_006673668.1|	Up
TRINITY_DN5162_c0_g2	9.70024	4.55733	2.87137e-06	0.000120461	0	0	0	0	39.952	53.11	alpha/beta hydrolase fold domain containing protein [Cordyceps militaris CM01]	0	gi|573985589|ref|XP_006670715.1|	Up
TRINITY_DN4893_c1_g5	9.66666	4.52976	2.48789e-06	0.000106659	0	0	0	255.694	0	314.302	.	.	.
TRINITY_DN8282_c0_g3	9.64845	4.52041	0.00041565	0.00783289	0	0	0	180.776	0	0	cytochrome C1 family protein [Beauveria bassiana ARSEF 2860]	0	gi|667646909|ref|XP_008595286.1|	Up
TRINITY_DN3637_c0_g1	9.63142	7.04411	2.18878e-16	7.87069e-14	9.131	0	0	798.835	1190.33	6818.47	hypothetical protein CCM_06308 [Cordyceps militaris CM01]	2e-22	gi|573987183|ref|XP_006671512.1|	Up
TRINITY_DN11224_c0_g1	9.6243	4.48862	8.79394e-15	2.27866e-12	0	0	0	64.671	35.705	53.715	.	.	.
TRINITY_DN10310_c0_g3	9.56739	4.4357	2.88897e-06	0.000120911	0	0	0	93.624	106.79	0	stress response RCI peptide, putative [Cordyceps militaris CM01]	2e-26	gi|573975110|ref|XP_006665500.1|	Up
TRINITY_DN9591_c0_g1	9.55914	6.18829	4.61651e-12	7.46266e-10	0	0	1.606	1349.61	467.959	38.754	Hydrophobin [Cordyceps militaris CM01]	4e-53	gi|573990493|ref|XP_006673167.1|	Up
TRINITY_DN8124_c0_g1	9.49503	9.82767	2.37632e-15	7.09675e-13	7.989	3.125	4.896	171.218	5504.9	6061.75	hypothetical protein CCM_07116 [Cordyceps militaris CM01]	2e-70	gi|573988793|ref|XP_006672317.1|	Up
TRINITY_DN9916_c0_g2	9.44958	4.32764	1.30746e-05	0.000452602	0	0	0	28.904	4.3	0	HAM-2, protein required for hyphal anastomosis [Cordyceps militaris CM01]	0	gi|573985741|ref|XP_006670791.1|	Up
TRINITY_DN4110_c0_g1	9.42657	4.29661	1.76467e-12	2.98976e-10	0	0	0	15.284	42.238	27.856	.	.	.
TRINITY_DN4737_c0_g2	9.41248	4.29214	1.40348e-05	0.000478322	0	0	0	51.949	7.974	0	.	.	.
TRINITY_DN10264_c0_g1	9.38326	4.25592	6.86806e-11	8.64395e-09	0	0	0	30.768	75.01	16.216	adenylosuccinate synthetase [Cordyceps militaris CM01]	0	gi|573989273|ref|XP_006672557.1|	Up
TRINITY_DN5049_c0_g1	9.35851	5.99351	4.88974e-16	1.62561e-13	0	0	0.406	61.479	299.967	47.541	hypothetical protein CCM_02240 [Cordyceps militaris CM01]	4e-46	gi|573979020|ref|XP_006667455.1|	Up
TRINITY_DN3762_c0_g2	9.34996	10.0213	6.48432e-11	8.21969e-09	5.184	0	0	407.509	432.234	2564.27	FAD binding domain protein [Cordyceps militaris CM01]	0	gi|573985897|ref|XP_006670869.1|	Up
TRINITY_DN2568_c0_g2	9.33048	4.21414	2.50522e-05	0.000777147	0	0	0	67.462	0	7.395	glycyl-tRNA synthetase [Cordyceps militaris CM01]	0	gi|573983949|ref|XP_006669895.1|	Up
TRINITY_DN2103_c0_g2	9.26085	4.13281	1.74248e-05	0.000578201	0	0	0	0	7.41	28.267	RNA polymerase I specific transcription initiation factor RRN3, putative [Cordyceps militaris CM01]	0	gi|573987791|ref|XP_006671816.1|	Up
TRINITY_DN5606_c0_g1	9.24933	4.12523	1.16917e-09	1.25615e-07	0	0	0	9.377	73.622	49.846	.	.	.
TRINITY_DN1353_c0_g2	9.24027	4.12082	1.15138e-10	1.40884e-08	0	0	0	18.467	4.373	15.006	neutral ceramidase precursor [Cordyceps militaris CM01]	0	gi|573983809|ref|XP_006669825.1|	Up
TRINITY_DN6416_c0_g6	9.23512	4.1069	0.000868645	0.0141764	0	0	0	0	0	80.51	conserved lysine-rich protein, putative [Cordyceps militaris CM01]	5e-143	gi|573985399|ref|XP_006670620.1|	Up
TRINITY_DN3700_c0_g2	9.17563	4.06777	5.55762e-05	0.00152294	0	0	0	52.829	0	3.652	C2H2 finger domain protein, putative [Cordyceps militaris CM01]	0	gi|573991801|ref|XP_006673821.1|	Up
TRINITY_DN3870_c0_g2	9.17515	4.05635	3.45734e-09	3.27517e-07	0	0	0	9.625	33.941	5.135	condensin complex component cnd2 [Cordyceps militaris CM01]	0	gi|573977660|ref|XP_006666775.1|	Up
TRINITY_DN10395_c0_g4	9.17003	4.05214	1.26258e-12	2.22467e-10	0	0	0	71.773	81.543	85.177	protein kinase domain protein [Cordyceps militaris CM01]	3e-59	gi|573991495|ref|XP_006673668.1|	Up
TRINITY_DN6174_c0_g2	9.13599	4.01582	0.000912282	0.0147472	0	0	0	0	49.888	0	glycogen phosphorylase [Cordyceps militaris CM01]	0	gi|573982977|ref|XP_006669409.1|	Up
TRINITY_DN8282_c0_g4	9.11306	3.99395	0.000944634	0.0151451	0	0	0	0	124.324	0	cytochrome C1 family protein [Beauveria bassiana ARSEF 2860]	0	gi|667646909|ref|XP_008595286.1|	Up
TRINITY_DN6528_c0_g2	9.11306	3.99395	0.000944603	0.0151451	0	0	0	0	80.416	0	MFS transporter, putative [Cordyceps militaris CM01]	0	gi|573989711|ref|XP_006672776.1|	Up
TRINITY_DN11041_c0_g5	9.09414	3.99251	0.000818183	0.0135774	0	0	0	162.071	0	0	40S ribosomal protein S14 [Cordyceps militaris CM01]	8e-92	gi|573977764|ref|XP_006666827.1|	Up
TRINITY_DN6310_c0_g19	9.05342	3.95412	0.000844659	0.0138704	0	0	0	92.821	0	0	speract/scavenger receptor domain-containing protein [Cordyceps militaris CM01]	1e-61	gi|573975136|ref|XP_006665513.1|	Up
TRINITY_DN1297_c0_g2	8.98845	3.87253	3.85246e-05	0.00111829	0	0	0	0	4.269	21.443	SNF2 family helicase [Cordyceps militaris CM01]	0	gi|573985655|ref|XP_006670748.1|	Up
TRINITY_DN5976_c1_g2	8.98036	3.87814	1.76682e-05	0.000584079	0	0	0	9.759	0	4.473	activating signal cointegrator 1 complex subunit 3 [Cordyceps militaris CM01]	0	gi|573983083|ref|XP_006669462.1|	Up
TRINITY_DN5595_c0_g1	8.96989	3.87081	6.90731e-07	3.57961e-05	0	0	0	112.492	6.273	14.584	hypothetical protein CCM_08500 [Cordyceps militaris CM01]	2e-65	gi|573991561|ref|XP_006673701.1|	Up
TRINITY_DN1029_c0_g2	8.96657	3.85302	3.22549e-06	0.000132478	0	0	0	28.168	16.031	380.181	hypothetical protein CCM_03164 [Cordyceps militaris CM01]	2e-28	gi|573980917|ref|XP_006668379.1|	Up
TRINITY_DN10135_c0_g1	8.96322	7.54406	1.02182e-23	1.05909e-20	1.095	0.644	1.006	156.899	885.164	438.085	aliphatic nitrilase, putative [Cordyceps militaris CM01]	0	gi|573992967|ref|XP_006674404.1|	Up
TRINITY_DN5548_c0_g5	8.94082	3.82921	2.19991e-05	0.000695915	0	0	0	0	44.952	26.703	hypothetical protein CCM_05067 [Cordyceps militaris CM01]	2e-55	gi|573984711|ref|XP_006670276.1|	Up
TRINITY_DN4811_c0_g2	8.88259	3.78844	3.22149e-05	0.000963712	0	0	0	20.608	0	5.352	transcriptional regulator Medusa [Cordyceps militaris CM01]	0	gi|573977814|ref|XP_006666852.1|	Up
TRINITY_DN3664_c1_g1	8.86368	6.77467	3.42894e-31	9.3415e-28	1.001	0	1.848	417.411	738.577	436.544	.	.	.
TRINITY_DN3594_c0_g2	8.84696	3.75126	8.81597e-09	7.8059e-07	0	0	0	36.331	13.088	7.03	lipase/esterase family protein, putative [Cordyceps militaris CM01]	0	gi|573984657|ref|XP_006670249.1|	Up
TRINITY_DN6311_c0_g1	8.81882	3.72364	2.04506e-05	0.000661175	0	0	0	80.968	93.953	0	Histone H2B [Cordyceps militaris CM01]	6e-58	gi|573976966|ref|XP_006666428.1|	Up
TRINITY_DN11327_c0_g1	8.77135	6.20274	1.51075e-14	3.69714e-12	0	7.932	6.067	669.836	936.743	5588.97	hypothetical protein CCM_06308 [Cordyceps militaris CM01]	8e-13	gi|573987183|ref|XP_006671512.1|	Up
TRINITY_DN7868_c0_g1	8.7688	3.68563	5.1901e-05	0.00143113	0	0	0	384.081	19.329	2.842	.	.	.
TRINITY_DN5510_c0_g2	8.7426	3.65895	5.01891e-05	0.00139265	0	0	0	16.201	3.475	0	ABC transporter, putative [Cordyceps militaris CM01]	0	gi|573986865|ref|XP_006671353.1|	Up
TRINITY_DN649_c0_g8	8.71397	3.63339	7.51163e-05	0.00193219	0	0	0	35.098	5.187	0	hypothetical protein BBA_05482 [Beauveria bassiana ARSEF 2860]	1e-83	gi|667653939|ref|XP_008598801.1|	Up
TRINITY_DN2297_c0_g1	8.68996	3.59283	4.36714e-05	0.00124715	0.009	0.01	0	0	12.138	5.9	bacteriodes thetaiotaomicron symbiotic chitinase [Cordyceps militaris CM01]	0	gi|573975192|ref|XP_006665541.1|	Up
TRINITY_DN4379_c0_g2	8.68468	5.36901	1.56964e-10	1.90738e-08	0	0.481	0	5.42	129.71	104.999	hypothetical protein CCM_02048 [Cordyceps militaris CM01]	0	gi|573978640|ref|XP_006667265.1|	Up
TRINITY_DN11153_c0_g1	8.6763	3.57933	3.77039e-05	0.00110633	0	0	0	0	140.543	132.638	hypothetical protein BBAD15_g4465 [Beauveria bassiana D1-5]	1e-18	gi|701776289|gb|KGQ10193.1|	Up
TRINITY_DN2090_c0_g1	8.67387	5.34543	2.76145e-20	1.56958e-17	0	0.471	0	49.474	85.186	98.118	cytochrome P450 pisatin demethylase, putative [Cordyceps militaris CM01]	0	gi|573980807|ref|XP_006668324.1|	Up
TRINITY_DN4482_c0_g1	8.62971	3.53758	3.00194e-07	1.75146e-05	0	0	0	24.001	29.505	165.835	RNA binding protein [Cordyceps militaris CM01]	5e-97	gi|573990275|ref|XP_006673058.1|	Up
TRINITY_DN6723_c0_g1	8.61642	6.01315	1.52767e-06	7.04648e-05	0.444	0	0.406	4.483	3.11	401.19	hypothetical protein CCM_07798 [Cordyceps militaris CM01]	0	gi|573990161|ref|XP_006673001.1|	Up
TRINITY_DN6174_c0_g15	8.61394	3.51766	0.00173904	0.0242996	0	0	0	0	0	34.395	glycogen phosphorylase [Cordyceps militaris CM01]	0	gi|573982977|ref|XP_006669409.1|	Up
TRINITY_DN10395_c0_g8	8.5448	3.453	0.00189365	0.0258451	0	0	0	0	0	153.716	protein kinase domain protein [Cordyceps militaris CM01]	3e-59	gi|573991495|ref|XP_006673668.1|	Up
TRINITY_DN5612_c0_g1	8.51926	3.43461	4.91869e-07	2.70148e-05	0	0	0	5.334	51.715	55.244	Beta-lactamase-type transpeptidase fold domain containing protein [Cordyceps militaris CM01]	6e-151	gi|573986015|ref|XP_006670928.1|	Up
TRINITY_DN8448_c2_g1	8.49093	10.0829	3.71115e-31	9.3415e-28	2.691	7.864	4.325	839.878	2351.77	2091.16	steroid monooxygenase (CpmA), putative [Cordyceps militaris CM01]	0	gi|573981851|ref|XP_006668846.1|	Up
TRINITY_DN1199_c0_g1	8.47425	3.41248	4.50436e-05	0.00127805	0	0	0	39.361	2.38	0.776	ABC multidrug transporter, putative [Cordyceps militaris CM01]	1e-159	gi|573990035|ref|XP_006672938.1|	Up
TRINITY_DN5619_c0_g1	8.44451	3.37222	2.48374e-09	2.50077e-07	0	0	0	17.645	16.156	11.389	hypothetical protein CCM_03458 [Cordyceps militaris CM01]	0	gi|573981503|ref|XP_006668672.1|	Up
TRINITY_DN3881_c0_g2	8.42968	3.3596	4.99621e-09	4.60907e-07	0	0	0	36.541	26.52	18.076	sphingolipid long chain base-responsive protein PIL1 [Cordyceps militaris CM01]	1e-175	gi|573987133|ref|XP_006671487.1|	Up
TRINITY_DN3010_c0_g1	8.41542	3.34046	4.23058e-08	3.10595e-06	0	0	0	42.678	130.607	155.428	.	.	.
TRINITY_DN1469_c0_g2	8.40658	3.32838	7.04755e-05	0.00183695	0	0	0	0	9.539	6.984	MYND domain protein [Cordyceps militaris CM01]	0	gi|573991655|ref|XP_006673748.1|	Up
TRINITY_DN5647_c0_g2	8.37323	3.30575	3.34543e-09	3.20361e-07	0	0	0	18.763	19.966	16.262	ATP-binding cassette transporter, putative [Cordyceps militaris CM01]	2e-34	gi|573976804|ref|XP_006666347.1|	Up
TRINITY_DN4322_c0_g2	8.32149	3.26028	1.27816e-08	1.07756e-06	0	0	0	25.396	20.206	11.617	Thioesterase [Cordyceps militaris CM01]	2e-155	gi|573982013|ref|XP_006668927.1|	Up
TRINITY_DN8395_c0_g1	8.29725	7.52559	2.64621e-26	3.58664e-23	1.7	0.99	0.784	150.935	472.551	507.468	hypothetical protein CCM_04220 [Cordyceps militaris CM01]	0	gi|573983021|ref|XP_006669431.1|	Up
TRINITY_DN6310_c0_g2	8.28209	3.2154	0.00234263	0.0305079	0	0	0	0	53.708	0	speract/scavenger receptor domain-containing protein [Cordyceps militaris CM01]	1e-61	gi|573975136|ref|XP_006665513.1|	Up
TRINITY_DN6310_c0_g16	8.27974	3.23836	0.00205825	0.0274329	0	0	0	54.148	0	0	speract/scavenger receptor domain-containing protein [Cordyceps militaris CM01]	1e-61	gi|573975136|ref|XP_006665513.1|	Up
TRINITY_DN3664_c0_g1	8.25844	3.19855	2.98455e-08	2.26671e-06	0	0	0	102.006	257.927	131.783	.	.	.
TRINITY_DN5002_c0_g1	8.244	3.20602	0.00209107	0.0277864	0	0	0	15.762	0	0	hypothetical protein CCM_00048 [Cordyceps militaris CM01]	1e-148	gi|573974652|ref|XP_006665271.1|	Up
TRINITY_DN7701_c0_g1	8.23799	7.6274	6.5258e-30	1.43731e-26	3.711	1.74	1.364	508.291	1092.76	526.046	.	.	.
TRINITY_DN2863_c0_g1	8.20346	3.14141	9.93738e-05	0.0024489	0	0	0	0	26.52	23.337	BTB/POZ fold domain containing protein [Cordyceps militaris CM01]	0	gi|573986335|ref|XP_006671088.1|	Up
TRINITY_DN4647_c0_g1	8.1914	3.15168	0.000150645	0.00339433	0	0	0	16.364	0	3.789	eukaryotic aspartyl protease [Beauveria bassiana ARSEF 2860]	0	gi|667646431|ref|XP_008595047.1|	Up
TRINITY_DN9149_c0_g1	8.1719	3.12483	1.73615e-06	7.88426e-05	0	0	0	85.604	8.569	72.521	hypothetical protein CCM_07981 [Cordyceps militaris CM01]	7e-61	gi|573990527|ref|XP_006673184.1|	Up
TRINITY_DN4623_c0_g1	8.14987	3.11143	2.45195e-06	0.000105374	0	0	0	16.316	2.421	2.876	C6 zinc finger domain protein [Cordyceps militaris CM01]	0	gi|573974726|ref|XP_006665308.1|	Up
TRINITY_DN5172_c0_g1	8.13855	7.92033	1.75803e-28	3.09765e-25	2.427	0.808	0.958	197.972	481.329	527.107	cytochrome P450 oxidoreductase OrdA-like protein [Cordyceps militaris CM01]	0	gi|573977608|ref|XP_006666749.1|	Up
TRINITY_DN903_c0_g4	8.13113	3.1044	0.00238837	0.030989	0	0	0	99.645	0	0	RING finger protein [Cordyceps militaris CM01]	2e-112	gi|573986495|ref|XP_006671168.1|	Up
TRINITY_DN3424_c0_g1	8.11664	4.80607	2.06561e-15	6.27518e-13	0	1	0	163.495	80.061	95.413	.	.	.
TRINITY_DN5997_c0_g1	8.09368	5.97118	9.05941e-07	4.522e-05	0	0	0.832	268.98	12.284	2.819	TAM domain methyltransferase, putative [Cordyceps militaris CM01]	0	gi|573984583|ref|XP_006670212.1|	Up
TRINITY_DN1270_c0_g1	8.06969	3.03221	6.47085e-08	4.47123e-06	0	0	0	8.717	5.281	3.914	RINT-1 family protein [Cordyceps militaris CM01]	0	gi|573977200|ref|XP_006666545.1|	Up
TRINITY_DN3407_c0_g2	8.05266	3.00857	5.51045e-07	2.96019e-05	0	0	0	7.905	13.109	34.977	hypothetical protein CCM_05948 [Cordyceps militaris CM01]	0	gi|573986469|ref|XP_006671155.1|	Up
TRINITY_DN11041_c0_g7	8.03419	2.9873	0.00013887	0.00319437	0	0	0	0	37.333	39.085	40S ribosomal protein S14 [Cordyceps militaris CM01]	1e-91	gi|573977764|ref|XP_006666827.1|	Up
TRINITY_DN1924_c0_g2	8.0217	2.98806	3.34419e-07	1.92564e-05	0	0	0	18.333	5.072	16.056	hypothetical protein BBAD15_g9760 [Beauveria bassiana D1-5]	0	gi|701769986|gb|KGQ05008.1|	Up
TRINITY_DN2272_c0_g1	8.00176	2.96611	1.83229e-05	0.000600093	0	0	0	8.985	37.719	1.94	hypothetical protein BBAD15_g5774 [Beauveria bassiana D1-5]	9e-78	gi|701774675|gb|KGQ08894.1|	Up
TRINITY_DN702_c0_g1	7.98742	2.95864	0.000127872	0.00298424	0	0	0	9.023	13.933	0	hypothetical protein CCM_07308 [Cordyceps militaris CM01]	0	gi|573989183|ref|XP_006672512.1|	Up
TRINITY_DN4070_c0_g6	7.97517	6.286	2.30068e-18	9.88732e-16	0	0.567	0.445	41.378	53.009	183.272	Pyridoxal phosphate-dependent transferase, major region [Cordyceps militaris CM01]	0	gi|573975796|ref|XP_006665843.1|	Up
TRINITY_DN777_c0_g1	7.964	2.94834	0.00024777	0.00517877	0	0	0	12.311	0	2.568	MFS multidrug transporter, putative [Cordyceps militaris CM01]	0	gi|573982929|ref|XP_006669385.1|	Up
TRINITY_DN9693_c0_g1	7.9465	2.92021	7.13106e-08	4.90817e-06	0	0	0	45.536	35.652	28.655	hypothetical protein BBAD15_g9433 [Beauveria bassiana D1-5]	3e-34	gi|701770358|gb|KGQ05328.1|	Up
TRINITY_DN11358_c0_g1	7.94142	2.92826	2.99585e-05	0.00091169	0	0	0	124.401	10.573	10.91	.	.	.
TRINITY_DN5658_c0_g2	7.93223	2.90905	2.88087e-07	1.69203e-05	0	0	0	12.149	10.197	3.834	chromatin assembly factor 1 subunit A, putative [Cordyceps militaris CM01]	0	gi|573980723|ref|XP_006668282.1|	Up
TRINITY_DN5819_c1_g1	7.92743	2.90551	9.54961e-07	4.75322e-05	0	0	0	13.716	12.305	2.842	N,O-diacetyl muramidase, putative [Cordyceps militaris CM01]	1e-109	gi|573991095|ref|XP_006673468.1|	Up
TRINITY_DN6243_c0_g2	7.90405	2.8972	0.000374725	0.00715348	0	0	0	18.39	0	2.511	hypothetical protein CCM_06252 [Cordyceps militaris CM01]	0	gi|573987071|ref|XP_006671456.1|	Up
TRINITY_DN5387_c0_g1	7.85922	2.8629	0.00313677	0.0382491	0	0	0	14.242	0	0	neutral trehalase [Cordyceps militaris CM01]	0	gi|573985673|ref|XP_006670757.1|	Up
TRINITY_DN7581_c0_g2	7.8459	6.74396	2.79853e-05	0.000859061	1.152	1.269	0	1.262	3.528	633.362	nucleosome assembly protein [Cordyceps militaris CM01]	0	gi|573982455|ref|XP_006669148.1|	Up
TRINITY_DN1971_c0_g1	7.77706	4.4803	7.72549e-12	1.19406e-09	0	0.798	0	45.698	43.313	123.737	hypothetical protein MAJ_11302, partial [Metarhizium majus ARSEF 297]	2e-138	gi|743656395|gb|KID83798.1|	Up
TRINITY_DN284_c0_g2	7.73903	2.73446	2.13609e-07	1.31601e-05	0	0	0	8.459	11.011	7.258	hypothetical protein CCM_08129 [Cordyceps militaris CM01]	0	gi|573990821|ref|XP_006673331.1|	Up
TRINITY_DN1349_c0_g1	7.70978	4.37369	1.03364e-07	6.84687e-06	0	0	0.261	2.055	32.532	48.888	hypothetical protein UCP014753 [Beauveria bassiana ARSEF 2860]	0	gi|667656165|ref|XP_008599914.1|	Up
TRINITY_DN2694_c0_g1	7.70355	2.68749	0.00437664	0.0489317	0	0	0	0	0	49.778	hypothetical protein CCM_04980 [Cordyceps militaris CM01]	7e-26	gi|573984535|ref|XP_006670188.1|	Up
TRINITY_DN2767_c0_g2	7.68856	2.68181	1.06914e-05	0.000382114	0	0	0	7.522	26.729	67.626	hypothetical protein CCM_07953 [Cordyceps militaris CM01]	7e-112	gi|573990471|ref|XP_006673156.1|	Up
TRINITY_DN2268_c0_g2	7.66721	2.66629	1.72624e-06	7.87987e-05	0	0	0	5.926	14.758	23.143	hypothetical protein CCM_08797 [Cordyceps militaris CM01]	5e-63	gi|573992151|ref|XP_006673996.1|	Up
TRINITY_DN8690_c0_g1	7.66443	5.10358	1.71136e-10	2.06535e-08	2.257	0	0	31.064	156.157	364.102	hypothetical protein BBA_03973 [Beauveria bassiana ARSEF 2860]	2e-58	gi|667650921|ref|XP_008597292.1|	Up
TRINITY_DN2698_c0_g2	7.66385	2.67016	2.84917e-07	1.67901e-05	0	0	0	6.242	5.427	4.439	Ras like GTPase [Cordyceps militaris CM01]	0	gi|573981101|ref|XP_006668471.1|	Up
TRINITY_DN2899_c0_g1	7.66356	2.66346	1.67816e-06	7.68031e-05	0	0	0	10.313	17.158	36.883	hypothetical protein Z517_08578 [Fonsecaea pedrosoi CBS 271.37]	2e-20	gi|759302332|gb|KIW78739.1|	Up
TRINITY_DN3946_c0_g2	7.62752	2.63091	5.14266e-06	0.000199151	0	0	0	5.831	6.252	24.444	.	.	.
TRINITY_DN649_c0_g7	7.61995	2.65473	0.00393838	0.045415	0	0	0	26.171	0	0	hypothetical protein BBA_05482 [Beauveria bassiana ARSEF 2860]	1e-85	gi|667653939|ref|XP_008598801.1|	Up
TRINITY_DN3604_c1_g2	7.61449	2.61705	0.00449417	0.0497408	0	0	0	0	13.871	0	Rik1-associated factor 1 [Cordyceps militaris CM01]	0	gi|573992331|ref|XP_006674086.1|	Up
TRINITY_DN6454_c0_g2	7.58229	2.62236	0.00409334	0.046684	0	0	0	11.652	0	0	.	.	.
TRINITY_DN189_c1_g1	7.57599	2.58415	1.13833e-05	0.000403567	0	0	0	4.827	11.992	34.772	MFS multidrug transporter [Cordyceps militaris CM01]	0	gi|573979678|ref|XP_006667784.1|	Up
TRINITY_DN9923_c0_g12	7.56308	2.6059	0.00419975	0.0475771	0	0	0	113.562	0	0	hypothetical protein BBA_08633 [Beauveria bassiana ARSEF 2860]	1e-32	gi|667660241|ref|XP_008601952.1|	Up
TRINITY_DN10353_c0_g1	7.51249	6.55161	1.24299e-08	1.05805e-06	0.746	1.74	2.728	6.05	201.641	794.062	60S ribosomal protein L3 [Cordyceps militaris CM01]	2e-32	gi|573992277|ref|XP_006674059.1|	Up
TRINITY_DN3199_c0_g1	7.50814	6.11624	3.97221e-19	1.89163e-16	0.302	0.586	0.561	73.207	45.943	184.094	hypothetical protein CCM_01059 [Cordyceps militaris CM01]	0	gi|573976670|ref|XP_006666280.1|	Up
TRINITY_DN3646_c0_g1	7.48052	2.51078	6.64011e-07	3.48211e-05	0	0	0	9.291	8.579	8.045	hypothetical protein FOYG_16790 [Fusarium oxysporum FOSC 3-a]	2e-11	gi|587658482|gb|EWY80873.1|	Up
TRINITY_DN1364_c0_g11	7.47485	2.48795	0.00537931	0.0578301	0	0	0	0	0	66.473	hypothetical protein CCM_06626 [Cordyceps militaris CM01]	9e-173	gi|573987819|ref|XP_006671830.1|	Up
TRINITY_DN3010_c0_g2	7.47315	6.08147	4.09737e-20	2.25611e-17	2.399	5.643	4.393	314	889.547	1143.25	hypothetical protein TCE0_013f00799 [Talaromyces cellulolyticus]	3e-12	gi|748560301|dbj|GAM33699.1|	Up
TRINITY_DN5116_c0_g3	7.45705	2.48834	8.78164e-07	4.40833e-05	0	0	0	5.831	7.734	8.331	hypothetical protein CCM_08300 [Cordyceps militaris CM01]	0	gi|573991163|ref|XP_006673502.1|	Up
TRINITY_DN4388_c0_g1	7.43659	2.48026	0.000326225	0.00644404	0	0	0	7.503	7.41	0	conserved fungal protein [Cordyceps militaris CM01]	0	gi|573974734|ref|XP_006665312.1|	Up
TRINITY_DN5695_c0_g1	7.4298	5.36311	1.24008e-14	3.12146e-12	0.538	0	0.484	85.92	17.628	52.745	fungal specific transcription factor [Beauveria bassiana ARSEF 2860]	8e-133	gi|667663069|ref|XP_008603366.1|	Up
TRINITY_DN5811_c2_g2	7.42571	2.46751	1.99592e-06	8.83623e-05	0	0	0	16.278	7.201	8.433	dioxygenase, putative [Cordyceps militaris CM01]	2e-127	gi|573988023|ref|XP_006671932.1|	Up
TRINITY_DN5240_c0_g1	7.39131	2.42813	1.04629e-05	0.000376237	0	0	0	6.117	32.427	18.875	integral membrane protein, putative [Cordyceps militaris CM01]	4e-126	gi|573983285|ref|XP_006669563.1|	Up
TRINITY_DN8243_c0_g1	7.35125	2.38751	0.00014817	0.00335044	0	0	0	1.09	6.93	26.772	hypothetical protein CCM_08337 [Cordyceps militaris CM01]	0	gi|573991237|ref|XP_006673539.1|	Up
TRINITY_DN254_c0_g1	7.33394	8.92983	1.20856e-27	1.77456e-24	3.957	5.009	5.457	479.043	1328.36	512.443	AMP dependent CoA ligase, putative [Cordyceps militaris CM01]	0	gi|573977116|ref|XP_006666503.1|	Up
TRINITY_DN1245_c0_g1	7.32632	2.36937	0.00608818	0.0629541	0	0	0	0	12.441	0	HbrB-like protein [Cordyceps militaris CM01]	0	gi|573988137|ref|XP_006671989.1|	Up
TRINITY_DN75_c0_g1	7.32382	2.37901	1.8625e-06	8.37173e-05	0	0.019	0.019	7.207	5.354	4.485	Dynamin family protein [Cordyceps militaris CM01]	0	gi|573992435|ref|XP_006674138.1|	Up
TRINITY_DN6155_c0_g1	7.31764	7.39787	5.96385e-13	1.08333e-10	9.934	3.326	7.808	108.726	2161.45	1190.05	hypothetical protein CCM_07885 [Cordyceps militaris CM01]	5e-32	gi|573990335|ref|XP_006673088.1|	Up
TRINITY_DN3737_c0_g1	7.31424	2.38366	7.64487e-05	0.00196359	0	0	0	32.202	3.507	4.793	hypothetical protein CCM_04372 [Cordyceps militaris CM01]	6e-127	gi|573983325|ref|XP_006669583.1|	Up
TRINITY_DN4941_c0_g2	7.29026	4.02911	2.75102e-06	0.000116242	0	0.452	0	1.587	64.114	22.002	cytochrome P450 monooxygenase, putative [Cordyceps militaris CM01]	0	gi|573989249|ref|XP_006672545.1|	Up
TRINITY_DN5819_c1_g2	7.27972	2.34134	4.71537e-06	0.000183816	0	0	0	6.834	8.663	3.435	N,O-diacetylmuramidase [Beauveria bassiana D1-5]	3e-96	gi|701777993|gb|KGQ11626.1|	Up
TRINITY_DN6292_c0_g2	7.26865	2.34137	9.42474e-05	0.00234553	0	0	0	16.928	0.96	6.938	glycosyl transferase [Cordyceps militaris CM01]	0	gi|573976844|ref|XP_006666367.1|	Up
TRINITY_DN11105_c0_g1	7.2529	2.30768	5.80759e-05	0.00157189	0	0	0	2.466	20.968	25.642	.	.	.
TRINITY_DN3565_c0_g1	7.24075	2.32388	0.000773637	0.01297	0	0	0	13.697	0	3.492	C6 transcription factor [Cordyceps militaris CM01]	0	gi|573988781|ref|XP_006672311.1|	Up
TRINITY_DN175_c0_g1	7.23429	2.31426	9.62826e-05	0.00238272	0	0	0	22.701	9.205	1.358	hypothetical protein CCM_03774 [Cordyceps militaris CM01]	1e-92	gi|573982129|ref|XP_006668985.1|	Up
TRINITY_DN5403_c0_g1	7.23257	2.28167	0.00691702	0.0692488	0	0	0	0	0	128.838	hypothetical protein CCM_02567 [Cordyceps militaris CM01]	1e-51	gi|573979674|ref|XP_006667782.1|	Up
TRINITY_DN8429_c0_g1	7.22512	3.91579	5.31173e-08	3.82011e-06	0	0	0.329	5.439	42.395	26.11	NAD(P)-binding domain [Cordyceps militaris CM01]	0	gi|573980130|ref|XP_006668010.1|	Up
TRINITY_DN1364_c0_g13	7.21483	2.31302	0.00602316	0.0625716	0	0	0	55.935	0	0	hypothetical protein CCM_06626 [Cordyceps militaris CM01]	8e-173	gi|573987819|ref|XP_006671830.1|	Up
TRINITY_DN3607_c0_g1	7.20272	3.89598	2.97435e-08	2.26671e-06	0	0	0.232	6.939	4.697	23.942	fatty acid oxygenase, putative [Cordyceps militaris CM01]	0	gi|573990627|ref|XP_006673234.1|	Up
TRINITY_DN4725_c0_g2	7.1889	2.26001	7.75375e-06	0.000288839	0	0	0	2.858	7.911	6.048	FAD dependent oxidoreductase, putative [Cordyceps militaris CM01]	0	gi|573992769|ref|XP_006674305.1|	Up
TRINITY_DN4379_c0_g1	7.1684	2.23566	0.000860682	0.014081	0	0	0	0	16.417	6.482	hypothetical protein CCM_02048 [Cordyceps militaris CM01]	0	gi|573978640|ref|XP_006667265.1|	Up
TRINITY_DN4600_c1_g1	7.15422	2.2353	3.51578e-05	0.0010394	0	0	0	14.892	3.288	21.26	ankyrin 2,3/unc44, putative [Cordyceps militaris CM01]	0	gi|573974964|ref|XP_006665427.1|	Up
TRINITY_DN16_c0_g2	7.11027	2.17979	0.00787072	0.075824	0	0	0	0	0	17.118	Putative HC-toxin efflux carrier TOXA [Beauveria bassiana D1-5]	1e-152	gi|701774757|gb|KGQ08963.1|	Up
TRINITY_DN2388_c0_g1	7.10258	2.18837	1.10051e-05	0.000390949	0	0	0	5.716	16.198	13.534	cytosolic Fe-S cluster assembling factor cfd1 [Cordyceps militaris CM01]	4e-175	gi|573984403|ref|XP_006670122.1|	Up
TRINITY_DN2697_c0_g2	7.09943	2.17414	0.0011543	0.0176398	0	0	0	0	2.672	11.435	beta-glucosidase 2 precursor [Cordyceps militaris CM01]	0	gi|573990385|ref|XP_006673113.1|	Up
TRINITY_DN1364_c0_g7	7.08617	2.20768	0.00696927	0.0696137	0	0	0	51.452	0	0	hypothetical protein CCM_06626 [Cordyceps militaris CM01]	8e-173	gi|573987819|ref|XP_006671830.1|	Up
TRINITY_DN10629_c0_g1	7.0735	3.78167	2.18989e-05	0.000693989	0.595	0	0	4.225	6.293	101.325	hypothetical protein CCM_09321 [Cordyceps militaris CM01]	0	gi|573993195|ref|XP_006674518.1|	Up
TRINITY_DN3226_c0_g10	7.05901	2.18565	0.0071568	0.0708443	0	0	0	16.526	0	0	choline oxidase (CodA), putative [Cordyceps militaris CM01]	0	gi|573977954|ref|XP_006666922.1|	Up
TRINITY_DN3159_c0_g5	7.04501	2.12607	0.00833555	0.0790912	0	0	0	0	0	14.596	hypothetical protein CCM_00144 [Cordyceps militaris CM01]	4e-135	gi|573974844|ref|XP_006665367.1|	Up
TRINITY_DN1075_c1_g1	7.02934	3.73662	3.95357e-05	0.001142	0	0	1.171	212.232	10.583	7.806	.	.	.
TRINITY_DN2433_c0_g1	7.02093	2.13896	0.000873058	0.0142175	0	0	0	12.799	0	5.672	.	.	.
TRINITY_DN3964_c0_g2	6.9564	3.66593	3.17834e-07	1.84826e-05	0	0	0.329	23.045	4.196	34.463	hypothetical protein CCM_08968 [Cordyceps militaris CM01]	0	gi|573992491|ref|XP_006674166.1|	Up
TRINITY_DN5180_c0_g1	6.95143	2.05639	0.00093697	0.0150705	0	0	0	0	3.736	3.697	Endonuclease/exonuclease/phosphatase [Cordyceps militaris CM01]	0	gi|573976356|ref|XP_006666123.1|	Up
TRINITY_DN3853_c0_g3	6.94799	2.06605	0.00113164	0.0173689	0	0	0	6.156	20.79	0	Fructosamine/Ketosamine-3-kinase [Cordyceps militaris CM01]	0	gi|573986857|ref|XP_006671349.1|	Up
TRINITY_DN9587_c0_g1	6.94737	2.06078	4.55311e-05	0.00128773	0	0	0	9.692	9.988	32.261	.	.	.
TRINITY_DN8682_c0_g1	6.9416	3.70313	1.1541e-06	5.54094e-05	0	0.625	0	49.627	3.789	41.219	alcohol dehydrogenase, putative [Cordyceps militaris CM01]	0	gi|573991087|ref|XP_006673464.1|	Up
TRINITY_DN4285_c0_g2	6.91609	2.05708	0.00114398	0.0174974	0	0	0	14.605	0	4.953	sorting nexin-41 [Cordyceps militaris CM01]	0	gi|573979814|ref|XP_006667852.1|	Up
TRINITY_DN4941_c0_g1	6.91216	2.02548	0.00109884	0.0169838	0	0	0	0	10.802	7.269	cytochrome P450 monooxygenase, putative [Cordyceps militaris CM01]	0	gi|573989249|ref|XP_006672545.1|	Up
TRINITY_DN119_c0_g1	6.90371	3.6161	9.76817e-08	6.56928e-06	0	0	0.581	23.246	15.708	66.61	hypothetical protein CCM_03166 [Cordyceps militaris CM01]	5e-176	gi|573980921|ref|XP_006668381.1|	Up
TRINITY_DN1959_c0_g2	6.8843	2.04582	0.00834291	0.0791185	0	0	0	12.177	0	0	DNA repair protein Rad26 [Cordyceps militaris CM01]	0	gi|573978258|ref|XP_006667074.1|	Up
TRINITY_DN7693_c0_g1	6.877	3.57566	0.000185577	0.00406442	0	0	0.629	2.084	104.379	3.321	hypothetical protein BBA_00083 [Beauveria bassiana ARSEF 2860]	1e-22	gi|667643141|ref|XP_008593402.1|	Up
TRINITY_DN3676_c0_g1	6.853	2.02113	0.0086628	0.0813205	0.019	0.01	0	15.857	0	0	.	.	.
TRINITY_DN5441_c0_g2	6.84757	1.99072	0.000102254	0.00250587	0	0	0	5.152	6.513	0.936	Counting factor 60 [Beauveria bassiana D1-5]	0	gi|701766767|gb|KGQ02561.1|	Up
TRINITY_DN4699_c0_g1	6.84275	1.98734	0.000105734	0.00256263	0	0	0	34.735	5.417	29.785	.	.	.
TRINITY_DN2570_c0_g1	6.82611	7.22691	2.04918e-08	1.63378e-06	6.941	2.029	7.17	10.619	1170.5	687.716	RNA binding protein [Cordyceps militaris CM01]	2e-75	gi|573990275|ref|XP_006673058.1|	Up
TRINITY_DN2556_c1_g1	6.80013	1.96046	0.000135378	0.00313863	0	0	0	34.209	5.479	11.309	.	.	.
TRINITY_DN9371_c0_g1	6.78089	8.69453	2.68327e-25	3.15195e-22	5.175	6.057	8.843	485.629	1224.75	496.364	Transferase [Cordyceps militaris CM01]	0	gi|573977114|ref|XP_006666502.1|	Up
TRINITY_DN2717_c0_g9	6.77749	1.93602	0.00119771	0.0181616	0	0	0	23.38	40.276	0	.	.	.
TRINITY_DN3929_c0_g2	6.7701	1.93572	9.2323e-05	0.00230089	0	0	0	28.34	8.276	7.828	hypothetical protein BBAD15_g8095 [Beauveria bassiana D1-5]	2e-13	gi|701771898|gb|KGQ06585.1|	Up
TRINITY_DN3063_c0_g1	6.74894	4.70599	1.53686e-08	1.27134e-06	0	0.875	1.374	36.341	25.664	212.292	Gurmarin-like inhibitors/Antifungal toxin [Cordyceps militaris CM01]	3e-25	gi|573975154|ref|XP_006665522.1|	Up
TRINITY_DN1323_c0_g6	6.74503	1.89528	0.0106588	0.0940921	0	0	0	0	26.51	0	nitrilase family protein (Nit3) [Cordyceps militaris CM01]	0	gi|573975662|ref|XP_006665776.1|	Up
TRINITY_DN11010_c0_g1	6.7001	1.86936	6.29829e-05	0.00168305	0	0	0	68.39	40.213	122.744	.	.	.
TRINITY_DN5652_c0_g1	6.69398	5.54095	5.71351e-08	4.05825e-06	1.086	0.423	0.648	5.907	209.093	21.568	LysM domain-containing protein [Cordyceps militaris CM01]	0	gi|573992243|ref|XP_006674042.1|	Up
TRINITY_DN3964_c0_g1	6.6653	1.82351	0.0123338	0.103872	0	0	0	0	0.031	14.687	hypothetical protein CCM_08968 [Cordyceps militaris CM01]	0	gi|573992491|ref|XP_006674166.1|	Up
TRINITY_DN3336_c0_g1	6.66436	1.84122	0.000144001	0.00327392	0	0	0	7.78	24.266	5.888	glutathione S-transferase kappa 1 [Cordyceps militaris CM01]	2e-158	gi|573978174|ref|XP_006667032.1|	Up
TRINITY_DN5606_c1_g1	6.65549	1.82913	0.000239205	0.00504162	0	0	0	11.613	95.07	46.286	.	.	.
TRINITY_DN11023_c1_g1	6.65229	7.90148	4.68443e-13	8.78082e-11	3.645	6.153	4.093	139.245	140.188	1111.71	phosphoribosyl-aminoimidazole-succinocarboxamide synthase [Cordyceps militaris CM01]	0	gi|573983455|ref|XP_006669648.1|	Up
TRINITY_DN7674_c0_g1	6.64693	6.80893	5.37096e-08	3.83143e-06	8.877	0	2.719	44.484	119.69	1025.54	hypothetical protein CCM_06079 [Cordyceps militaris CM01]	2e-89	gi|573986725|ref|XP_006671283.1|	Up
TRINITY_DN5800_c0_g1	6.643	1.84244	0.00172039	0.024154	0	0	0	9.969	0	3.697	ubiquitin thiolesterase [Cordyceps militaris CM01]	0	gi|573985969|ref|XP_006670905.1|	Up
TRINITY_DN4887_c0_g2	6.63925	6.89612	2.65181e-09	2.62499e-07	0	3.999	0	224.066	41.716	133.323	acyl-CoA dehydrogenase [Beauveria bassiana ARSEF 2860]	0	gi|667654553|ref|XP_008599108.1|	Up
TRINITY_DN2993_c0_g1	6.63597	1.83847	0.00182901	0.0252762	0	0	0	20.655	0	6.47	hypothetical protein CCM_00288 [Cordyceps militaris CM01]	1e-103	gi|573975132|ref|XP_006665511.1|	Up
TRINITY_DN632_c0_g1	6.63482	1.82247	3.02442e-05	0.000918798	0	0	0	18.189	12.66	15.988	Barwin-related endoglucanase [Cordyceps militaris CM01]	9e-57	gi|573987547|ref|XP_006671694.1|	Up
TRINITY_DN687_c0_g2	6.63134	1.83595	0.00179996	0.0249923	0	0	0	8.918	3.162	0	alkaline phosphatase family protein [Cordyceps militaris CM01]	0	gi|573990001|ref|XP_006672921.1|	Up
TRINITY_DN4334_c1_g1	6.62866	1.8056	0.000354548	0.00683494	0	0	0	2.332	17.565	25.14	hypothetical protein VHEMI00078 [Torrubiella hemipterigena]	3e-48	gi|729188520|emb|CEJ79863.1|	Up
TRINITY_DN3930_c0_g1	6.62144	1.80833	0.000102738	0.00250619	0	0	0	8.039	4.227	15.771	Fungal transcriptional regulatory protein [Cordyceps militaris CM01]	0	gi|573978164|ref|XP_006667027.1|	Up
TRINITY_DN4556_c1_g1	6.60998	1.81408	0.000218326	0.00467425	0	0	0	12.168	2.714	2.762	MFS transporter [Cordyceps militaris CM01]	1e-36	gi|573991921|ref|XP_006673881.1|	Up
TRINITY_DN5733_c0_g1	6.60169	1.81962	0.00291144	0.0362029	0	0	0	15.007	2.014	0	WD-repeat protein pop3 [Cordyceps militaris CM01]	0	gi|573975658|ref|XP_006665774.1|	Up
TRINITY_DN11201_c0_g1	6.59862	3.39307	0.00072187	0.012195	0	0.721	0	0	7.316	80.281	alcohol dehydrogenase, putative [Cordyceps militaris CM01]	0	gi|573978428|ref|XP_006667159.1|	Up
TRINITY_DN6214_c0_g1	6.59387	1.80712	0.00176213	0.0245639	0	0	0	14.299	5.855	0	hypothetical protein CCM_06684 [Cordyceps militaris CM01]	0	gi|573987935|ref|XP_006671888.1|	Up
TRINITY_DN3786_c0_g2	6.57573	1.75479	0.0134904	0.110046	0	0	0	0	0	169.544	hypothetical protein CCM_02567 [Cordyceps militaris CM01]	2e-42	gi|573979674|ref|XP_006667782.1|	Up
TRINITY_DN84_c0_g1	6.57433	1.76562	0.000399261	0.00755221	0	0	0	2.543	2.474	14.835	flavin-binding monooxygenase, putative [Cordyceps militaris CM01]	0	gi|573978928|ref|XP_006667409.1|	Up
TRINITY_DN4916_c0_g2	6.57051	1.7766	5.99078e-05	0.0016141	0	0	0	5.372	3.048	2.682	Major facilitator superfamily transporter [Cordyceps militaris CM01]	0	gi|573992647|ref|XP_006674244.1|	Up
TRINITY_DN5408_c0_g2	6.50097	4.54552	6.73099e-07	3.51929e-05	0	0.75	0	5.047	7.796	55.769	NB-ARC and ankyrin domain protein [Cordyceps militaris CM01]	0	gi|573989261|ref|XP_006672551.1|	Up
TRINITY_DN5050_c0_g2	6.49589	1.74739	0.0128776	0.106278	0	0	0	15.484	0	0	oxysterol binding protein (Orp8), putative [Cordyceps militaris CM01]	0	gi|573986837|ref|XP_006671339.1|	Up
TRINITY_DN5619_c0_g2	6.49562	6.29797	1.05336e-20	6.4001e-18	1.331	1.173	1.529	61.938	191.016	120.576	hypothetical protein CCM_03458 [Cordyceps militaris CM01]	0	gi|573981503|ref|XP_006668672.1|	Up
TRINITY_DN1665_c0_g2	6.49394	1.72726	0.00187105	0.0256559	0	0	0	9.864	6.774	0	hypothetical protein CCM_03918 [Cordyceps militaris CM01]	0	gi|573982417|ref|XP_006669129.1|	Up
TRINITY_DN1290_c0_g2	6.48775	1.72381	0.00190985	0.0260461	0	0	0	32.068	18.766	0	hypothetical protein CCM_01594 [Cordyceps militaris CM01]	3e-89	gi|573977736|ref|XP_006666813.1|	Up
TRINITY_DN3860_c0_g1	6.46997	1.67878	0.00339261	0.0404724	0	0	0	0	8.329	41.242	monooxygenase, putative [Cordyceps militaris CM01]	8e-111	gi|573978426|ref|XP_006667158.1|	Up
TRINITY_DN7767_c0_g1	6.46283	1.69274	0.000111516	0.00267334	0	0	0	10.342	13.985	5.17	.	.	.
TRINITY_DN1452_c0_g1	6.45574	1.67164	0.00217916	0.0288698	0	0	0	0	18.953	20.986	endothiapepsin precursor [Cordyceps militaris CM01]	1e-152	gi|573976206|ref|XP_006666048.1|	Up
TRINITY_DN4101_c0_g2	6.45469	1.68885	0.00208307	0.0277009	0	0	0	3.919	7.222	0	protein PFS2 [Beauveria bassiana ARSEF 2860]	0	gi|667663249|ref|XP_008603456.1|	Up
TRINITY_DN6249_c0_g1	6.43336	6.2147	3.43851e-13	6.73184e-11	1.256	0.981	2.699	26.457	235.154	181.8	hypothetical protein CCM_04642 [Cordyceps militaris CM01]	0	gi|573983863|ref|XP_006669852.1|	Up
TRINITY_DN10497_c0_g1	6.42685	1.67189	0.00038188	0.00725861	0	0	0	21.86	2.672	13.797	.	.	.
TRINITY_DN11010_c1_g1	6.41668	5.30788	2.84135e-14	6.76547e-12	0.482	0.836	0.223	33.54	23.055	77.006	hypothetical protein CCM_06743 [Cordyceps militaris CM01]	0	gi|573988051|ref|XP_006671946.1|	Up
TRINITY_DN3199_c0_g2	6.40997	3.22622	0.000280899	0.00572191	0	1.269	0	44.045	0	54.274	hypothetical protein CCM_01059 [Cordyceps militaris CM01]	1e-165	gi|573976670|ref|XP_006666280.1|	Up
TRINITY_DN5240_c1_g1	6.4009	1.63283	0.000972767	0.0155255	0	0	0	2.323	27.021	47.233	CFEM domain-containing protein [Beauveria bassiana ARSEF 2860]	1e-41	gi|667654397|ref|XP_008599030.1|	Up
TRINITY_DN10973_c0_g1	6.40064	1.64894	0.000148317	0.00335044	0	0	0	21.85	21.75	7.475	hypothetical protein CCM_04959 [Cordyceps militaris CM01]	9e-77	gi|573984493|ref|XP_006670167.1|	Up
TRINITY_DN4247_c0_g1	6.36896	1.65385	0.0145418	0.116413	0	0	0	7.13	0	0	ABC multidrug transporter, putative [Cordyceps militaris CM01]	0	gi|573984545|ref|XP_006670193.1|	Up
TRINITY_DN10654_c1_g1	6.34568	6.04208	2.43175e-09	2.4625e-07	2.304	1.615	1.267	312.719	9.226	110.249	MFS monocarboxylate transporter, putative [Cordyceps militaris CM01]	0	gi|573991081|ref|XP_006673461.1|	Up
TRINITY_DN6105_c1_g2	6.32248	1.5896	0.00284974	0.0356369	0	0	0	1.921	4.624	0	hypothetical protein FOZG_06292 [Fusarium oxysporum Fo47]	3e-43	gi|587699504|gb|EWZ46109.1|	Up
TRINITY_DN10598_c0_g1	6.31596	7.52905	1.58726e-08	1.30081e-06	2.823	4.961	7.789	135.231	27.199	1084.5	taurine catabolism dioxygenase TauD [Cordyceps militaris CM01]	0	gi|573993707|ref|XP_006674774.1|	Up
TRINITY_DN2807_c0_g2	6.31565	10.0004	3.71897e-08	2.77662e-06	6.062	0	2.177	222.861	315.194	112.451	non-ribosomal peptide synthase, putative [Cordyceps militaris CM01]	0	gi|573977118|ref|XP_006666504.1|	Up
TRINITY_DN8435_c0_g1	6.31463	9.25243	3.51626e-11	4.65838e-09	6.223	10.249	9.124	46.702	1235.37	733.055	Glycoside hydrolase, family 25 [Cordyceps militaris CM01]	2e-93	gi|573989251|ref|XP_006672546.1|	Up
TRINITY_DN10134_c0_g1	6.30159	11.1164	2.61075e-24	2.87508e-21	10.076	13.123	10.333	699.744	1435.69	473.518	polyketide synthase, putative [Cordyceps militaris CM01]	0	gi|573977112|ref|XP_006666501.1|	Up
TRINITY_DN3525_c0_g1	6.28695	1.56149	0.000103055	0.00250806	0	0	0	9.902	15.801	11.868	galactose-1-phosphate uridylyltransferase [Cordyceps militaris CM01]	3e-105	gi|573991827|ref|XP_006673834.1|	Up
TRINITY_DN3703_c0_g1	6.27763	1.5879	0.01616	0.125507	0	0	0	34.639	0	0	.	.	.
TRINITY_DN10688_c0_g1	6.2558	1.52299	0.00435547	0.0488111	0	0	0	0	6.826	28.233	ankyrin repeat protein [Cordyceps militaris CM01]	2e-24	gi|573978698|ref|XP_006667294.1|	Up
TRINITY_DN7441_c0_g2	6.24478	1.5179	0.00290696	0.0362029	0	0	0	0	5.239	6.813	4-coumarate-CoA ligase 2 [Cordyceps militaris CM01]	0	gi|573986751|ref|XP_006671296.1|	Up
TRINITY_DN227_c0_g1	6.21857	1.52461	0.00304698	0.0376492	0	0	0	20.703	0	12.416	.	.	.
TRINITY_DN161_c0_g1	6.21337	2.99869	1.12296e-06	5.42097e-05	0.444	0	0	7.226	17.774	21.135	cytochrome P450 family protein, putative [Cordyceps militaris CM01]	0	gi|573993241|ref|XP_006674541.1|	Up
TRINITY_DN5774_c0_g1	6.20224	6.38694	5.24157e-19	2.43043e-16	1.275	0.788	2.322	49.885	134.834	149.459	hypothetical protein CCM_08268 [Cordyceps militaris CM01]	0	gi|573991099|ref|XP_006673470.1|	Up
TRINITY_DN5629_c0_g1	6.1978	4.19298	3.07658e-09	2.97853e-07	0.519	0.606	0.474	52.963	14.518	58.907	hypothetical protein CCM_04233 [Cordyceps militaris CM01]	1e-32	gi|573983047|ref|XP_006669444.1|	Up
TRINITY_DN7235_c1_g1	6.19338	9.60059	2.98963e-13	5.98606e-11	22.05	76.413	43.027	569.789	5170.56	4508.54	Glutathione S-transferase [Cordyceps militaris CM01]	1e-150	gi|573979638|ref|XP_006667764.1|	Up
TRINITY_DN4392_c0_g1	6.16527	1.46745	0.000775896	0.0129709	0	0	0	3.699	21.49	26.566	Salicylate hydroxylase [Cordyceps militaris CM01]	4e-117	gi|573991887|ref|XP_006673864.1|	Up
TRINITY_DN10373_c0_g2	6.14794	1.45831	0.000684629	0.0116778	0	0	0	2.246	12.19	4.667	hypothetical protein CCM_07636 [Cordyceps militaris CM01]	1e-27	gi|573989839|ref|XP_006672840.1|	Up
TRINITY_DN3469_c0_g1	6.12682	1.45495	0.000301331	0.00606101	0	0	0	15.609	9.049	5.352	benzoate 4-monooxygenase cytochrome P450 [Cordyceps militaris CM01]	1e-138	gi|573981095|ref|XP_006668468.1|	Up
TRINITY_DN3979_c0_g2	6.12558	1.45618	0.00308553	0.0378363	0	0	0	4.062	0	3.264	hypothetical protein CCM_03807 [Cordyceps militaris CM01]	0	gi|573982195|ref|XP_006669018.1|	Up
TRINITY_DN5781_c0_g2	6.11211	7.12552	5.35429e-21	3.49417e-18	2.181	3.144	2.535	85.107	255.349	226.146	efflux protein [Cordyceps militaris CM01]	0	gi|573982307|ref|XP_006669074.1|	Up
TRINITY_DN951_c0_g2	6.11128	5.80005	4.5757e-10	5.29902e-08	0.954	1.125	1.471	7.809	96.687	147.645	hypothetical protein CCM_08033 [Cordyceps militaris CM01]	0	gi|573990629|ref|XP_006673235.1|	Up
TRINITY_DN1462_c1_g1	6.10951	1.42651	0.00204665	0.0273404	0	0	0	4.081	3.162	29.385	cytochrome P450, putative [Cordyceps militaris CM01]	6e-142	gi|573978432|ref|XP_006667161.1|	Up
TRINITY_DN9773_c0_g1	6.10588	1.42337	0.00596996	0.062243	0	0	0	10.227	0	58.131	hypothetical protein BBAD15_g5267 [Beauveria bassiana D1-5]	3e-19	gi|701775306|gb|KGQ09394.1|	Up
TRINITY_DN1726_c0_g1	6.0996	7.93069	5.02775e-14	1.16564e-11	1.908	3.442	3.512	85.853	73.194	445.81	oxidoreductase domain-containing protein [Cordyceps militaris CM01]	0	gi|573983453|ref|XP_006669647.1|	Up
TRINITY_DN263_c0_g1	6.08713	1.42489	0.000283414	0.00576645	0	0	0	17.329	16.469	7.555	.	.	.
TRINITY_DN5687_c0_g2	6.08641	1.44994	0.010088	0.0906143	0	0	0	28.503	1.743	0	hypothetical protein FOXB_08754 [Fusarium oxysporum Fo5176]	5e-14	gi|342879467|gb|EGU80714.1|	Up
TRINITY_DN54_c1_g1	6.07972	1.41281	0.000417109	0.00785198	0	0	0	5.295	18.432	11.104	.	.	.
TRINITY_DN10495_c0_g3	6.0609	1.40198	0.000918874	0.0148265	0.057	0	0	5.936	1.524	11.149	hypothetical protein CCM_04245 [Cordyceps militaris CM01]	0	gi|573983071|ref|XP_006669456.1|	Up
TRINITY_DN1452_c1_g1	6.04854	1.38501	0.00164303	0.0233469	0	0	0	1.558	18.087	20.518	endothiapepsin precursor [Cordyceps militaris CM01]	2e-91	gi|573976206|ref|XP_006666048.1|	Up
TRINITY_DN4600_c3_g1	6.03919	1.39037	0.000332907	0.00649593	0	0	0	17.778	8.266	19.16	ankyrin 2,3/unc44, putative [Cordyceps militaris CM01]	2e-113	gi|573974964|ref|XP_006665427.1|	Up
TRINITY_DN2166_c0_g1	6.01226	1.36773	0.000330222	0.00647941	0	0	0	5.047	8.193	12.108	hypothetical protein BBAD15_g8422 [Beauveria bassiana D1-5]	2e-17	gi|701771518|gb|KGQ06285.1|	Up
TRINITY_DN1619_c0_g1	6.0088	1.36594	0.000300002	0.0060481	0	0	0	6.165	12.879	11.823	gamma-glutamyltranspeptidase [Cordyceps militaris CM01]	2e-132	gi|573978674|ref|XP_006667282.1|	Up
TRINITY_DN3545_c2_g1	5.98847	1.35399	0.00427191	0.0481273	0	0	0	9.969	0	17.266	Protein kinase-like domain [Cordyceps militaris CM01]	7e-145	gi|573975778|ref|XP_006665834.1|	Up
TRINITY_DN8537_c0_g1	5.98504	1.35271	0.000250459	0.00522258	0	0	0	15.035	15.3	15.76	hypothetical protein CCM_00652 [Cordyceps militaris CM01]	7e-70	gi|573975858|ref|XP_006665874.1|	Up
TRINITY_DN2272_c0_g2	5.98314	6.35109	1.6395e-13	3.48048e-11	4.485	1.75	2.748	49.999	375.593	152.13	hypothetical protein BBAD15_g5774 [Beauveria bassiana D1-5]	1e-82	gi|701774675|gb|KGQ08894.1|	Up
TRINITY_DN6167_c0_g1	5.98129	4.03429	0.000146635	0.00332523	0.661	1.538	0	7.379	2.327	138.436	hypothetical protein BBA_06579 [Beauveria bassiana ARSEF 2860]	2e-82	gi|667656133|ref|XP_008599898.1|	Up
TRINITY_DN4600_c2_g1	5.97339	1.34628	0.000521851	0.00939993	0	0	0	17.033	5.939	18.361	ankyrin 2,3/unc44, putative [Cordyceps militaris CM01]	2e-92	gi|573974964|ref|XP_006665427.1|	Up
TRINITY_DN5871_c0_g1	5.97063	8.43572	1.60306e-11	2.25968e-09	2.247	4.115	6.289	29.124	364.237	388.569	Glucan 1,3-beta-glucosidase [Beauveria bassiana D1-5]	0	gi|701770866|gb|KGQ05762.1|	Up
TRINITY_DN8726_c0_g1	5.96409	1.34126	0.000514754	0.00930253	0	0	0	20.503	6.502	17.859	Major facilitator superfamily transporter [Cordyceps militaris CM01]	7e-90	gi|573978356|ref|XP_006667123.1|	Up
TRINITY_DN7547_c0_g1	5.96156	1.33107	0.000662385	0.0113644	0	0	0	6.022	18.682	24.033	.	.	.
TRINITY_DN4799_c0_g1	5.95034	1.32309	0.00519017	0.0560703	0	0	0	6.136	0	18.384	hypothetical protein CCM_02496 [Cordyceps militaris CM01]	2e-113	gi|573979532|ref|XP_006667711.1|	Up
TRINITY_DN5064_c0_g2	5.94885	1.30683	0.023637	0.162816	0	0	0	0	0	5.295	arg-6 protein [Cordyceps militaris CM01]	0	gi|573992891|ref|XP_006674366.1|	Up
TRINITY_DN4189_c0_g1	5.94789	3.46785	5.73498e-08	4.05825e-06	1.341	0	1.229	92.993	53.98	50.816	.	.	.
TRINITY_DN4685_c1_g1	5.9394	1.31944	0.000636834	0.0110118	0	0	0	11.212	8.694	24.626	protein tyrosine/serine phosphatase [Beauveria bassiana ARSEF 2860]	1e-14	gi|667662017|ref|XP_008602840.1|	Up
TRINITY_DN1029_c0_g1	5.93144	1.30128	0.00580526	0.0613578	0	0	0	0	14.278	37.67	hypothetical protein CCM_03164 [Cordyceps militaris CM01]	2e-28	gi|573980917|ref|XP_006668379.1|	Up
TRINITY_DN7659_c0_g1	5.9297	1.3395	0.00915271	0.0845041	0	0	0	29.717	0	3.389	hypothetical protein BBAD15_g2422 [Beauveria bassiana D1-5]	1e-84	gi|701778244|gb|KGQ11831.1|	Up
TRINITY_DN2626_c0_g1	5.92922	1.32579	0.00435382	0.0488111	0	0	0	1.376	1.054	0	phosphotidylinositol kinase Tel1, putative [Cordyceps militaris CM01]	0	gi|573989673|ref|XP_006672757.1|	Up
TRINITY_DN8593_c0_g1	5.90933	2.72729	2.88212e-05	0.00088318	0.661	0	0	4.053	25.028	26.726	U-box domain-containing protein [Cordyceps militaris CM01]	4e-118	gi|573988867|ref|XP_006672354.1|	Up
TRINITY_DN189_c0_g1	5.90774	1.29185	0.00163345	0.0233237	0	0	0	3.451	10.03	26.875	MFS multidrug transporter [Cordyceps militaris CM01]	5e-99	gi|573979678|ref|XP_006667784.1|	Up
TRINITY_DN6023_c1_g1	5.90375	5.72881	1.70972e-11	2.3909e-09	7.309	11.45	11.136	104.893	1024.18	711.532	hypothetical protein CCM_05678 [Cordyceps militaris CM01]	5e-35	gi|573985929|ref|XP_006670885.1|	Up
TRINITY_DN8293_c0_g1	5.89899	1.28814	0.00113557	0.0174141	0	0	0	4.464	23.4	24.067	.	.	.
TRINITY_DN3786_c0_g1	5.87568	1.25858	0.0273057	0.179659	0	0	0	0	0	55.552	hypothetical protein CCM_02567 [Cordyceps militaris CM01]	7e-71	gi|573979674|ref|XP_006667782.1|	Up
TRINITY_DN11364_c0_g1	5.85719	8.93629	1.00335e-27	1.60718e-24	79.719	64.444	71.386	2986.26	4177.42	5309.54	hypothetical protein TCE0_013f00799 [Talaromyces cellulolyticus]	4e-24	gi|748560301|dbj|GAM33699.1|	Up
TRINITY_DN4592_c0_g1	5.84911	2.69603	0.000225964	0.00479697	0.529	0	0	35.633	3.121	3.891	.	.	.
TRINITY_DN1765_c0_g1	5.84071	1.27193	0.00611952	0.06313	0	0	0	15.054	0	5.135	hypothetical protein CCM_00084 [Cordyceps militaris CM01]	7e-63	gi|573974724|ref|XP_006665307.1|	Up
TRINITY_DN4943_c1_g2	5.84052	1.2885	0.0243752	0.166469	0	0	0	5.926	0	0	siderochrome-iron transporter MirC [Cordyceps militaris CM01]	0	gi|573980266|ref|XP_006668075.1|	Up
TRINITY_DN967_c0_g1	5.83749	4.48131	2.69525e-06	0.000114435	3.116	0	0	148.823	49.033	12.884	mismatched base pair and cruciform DNA recognition protein, putative [Cordyceps militaris CM01]	5e-78	gi|573990817|ref|XP_006673329.1|	Up
TRINITY_DN183_c1_g5	5.83282	1.24064	0.0263073	0.174785	0	0	0	0	3.569	0	nucleolar protein NOP58 [Cordyceps militaris CM01]	0	gi|573991611|ref|XP_006673726.1|	Up
TRINITY_DN6734_c0_g1	5.83153	1.25399	0.00187054	0.0256559	0	0	0	17.587	2.046	18.955	hypothetical protein CCM_08383 [Cordyceps militaris CM01]	8e-35	gi|573991329|ref|XP_006673585.1|	Up
TRINITY_DN8148_c0_g1	5.83014	1.25416	0.00516084	0.055925	0	0	0	1.845	3.121	0	glucosyl/glucuronosyl transferase, putative [Cordyceps militaris CM01]	0	gi|573976538|ref|XP_006666214.1|	Up
TRINITY_DN2585_c0_g1	5.81145	1.23366	0.0011939	0.0181349	0	0	0	1.94	2.369	7.292	hypothetical protein CCM_07931 [Cordyceps militaris CM01]	0	gi|573990427|ref|XP_006673134.1|	Up
TRINITY_DN3571_c0_g2	5.80949	3.31509	0.000971913	0.0155255	0	0	0.822	38.195	0	12.439	phthalate transporter [Cordyceps militaris CM01]	0	gi|573975504|ref|XP_006665697.1|	Up
TRINITY_DN4097_c2_g1	5.78189	1.21872	0.000868926	0.0141764	0	0	0	27.404	13.745	42.143	.	.	.
TRINITY_DN3891_c1_g1	5.77539	2.61137	0.000102638	0.00250619	0.425	0	0	5.171	2.995	24.307	proline permease PrnB [Cordyceps militaris CM01]	0	gi|573988383|ref|XP_006672112.1|	Up
TRINITY_DN5125_c0_g1	5.77441	1.20102	0.00608336	0.0629411	0	0	0	0	38.209	48.808	.	.	.
TRINITY_DN404_c0_g1	5.77072	1.21303	0.000821057	0.0135841	0	0	0	9.74	14.539	4.998	P450 family sporulation-specific N-formyltyrosine oxidase Dit2 [Cordyceps militaris CM01]	7e-95	gi|573990423|ref|XP_006673132.1|	Up
TRINITY_DN7754_c0_g1	5.75124	1.20279	0.000816325	0.0135695	0	0	0	17.731	6.179	12.747	.	.	.
TRINITY_DN11182_c1_g1	5.75111	6.95114	1.22885e-06	5.83621e-05	4.504	11.297	5.322	5.248	294.592	831.869	short chain dehydrogenase/reductase family oxidoreductase, putative [Cordyceps militaris CM01]	0	gi|573985067|ref|XP_006670454.1|	Up
TRINITY_DN3607_c0_g2	5.74327	7.61629	2.06732e-11	2.8682e-09	2.247	3.644	3.106	18.572	207.559	256.09	fatty acid oxygenase, putative [Cordyceps militaris CM01]	0	gi|573990627|ref|XP_006673234.1|	Up
TRINITY_DN4016_c0_g2	5.73209	1.18388	0.00122431	0.018517	0	0	0	6.863	23.191	17.757	.	.	.
TRINITY_DN3891_c0_g2	5.73117	6.45005	5.24372e-15	1.42145e-12	4.051	3.951	0	83.157	169.266	165.082	Hsp70 family chaperone [Cordyceps militaris CM01]	0	gi|573988381|ref|XP_006672111.1|	Up
TRINITY_DN5844_c0_g2	5.71709	1.15714	0.0311467	0.197767	0	0	0	0	0	4.131	mitochondrial NADH kinase POS5, putative [Cordyceps militaris CM01]	0	gi|573984435|ref|XP_006670138.1|	Up
TRINITY_DN4228_c0_g2	5.70686	1.20263	0.0282296	0.184224	0	0	0	11.374	0	0	hypothetical protein TRIVIDRAFT_49802 [Trichoderma virens Gv29-8]	0	gi|358383105|gb|EHK20774.1|	Up
TRINITY_DN10580_c0_g1	5.69162	1.1493	0.00662631	0.0671395	0	0	0	0	20.383	23.588	.	.	.
TRINITY_DN75_c0_g2	5.68788	5.82847	3.98716e-21	2.70207e-18	1.898	1.25	0.987	65.56	80.114	72.213	Dynamin family protein [Cordyceps militaris CM01]	0	gi|573992435|ref|XP_006674138.1|	Up
TRINITY_DN2239_c0_g1	5.66214	1.16645	0.0127223	0.10559	0	0	0	19.872	2.714	0	.	.	.
TRINITY_DN7707_c0_g1	5.65015	2.53695	6.73714e-05	0.00177451	0	0.779	0	6.806	7.89	33.482	hypothetical protein BBAD15_g2008 [Beauveria bassiana D1-5]	4e-89	gi|701778701|gb|KGQ12219.1|	Up
TRINITY_DN8281_c0_g1	5.63082	1.10374	0.034037	0.20999	0	0	0	0	0	8.182	tRNA pseudouridine synthase [Cordyceps militaris CM01]	0	gi|573979908|ref|XP_006667899.1|	Up
TRINITY_DN3860_c2_g1	5.61814	1.10074	0.01141	0.0985513	0	0	0	0	5.072	22.686	monooxygenase, putative [Cordyceps militaris CM01]	1e-149	gi|573978426|ref|XP_006667158.1|	Up
TRINITY_DN11772_c0_g1	5.61458	1.09813	0.0190284	0.140256	0	0	0	1.587	0	28.461	ankyrin repeat protein [Cordyceps militaris CM01]	7e-124	gi|573978698|ref|XP_006667294.1|	Up
TRINITY_DN11309_c0_g1	5.61274	4.72723	5.37536e-09	4.93301e-07	1.624	5.73	4.47	103.182	92.826	404.762	hypothetical protein BBAD15_g9566 [Beauveria bassiana D1-5]	6e-75	gi|701770197|gb|KGQ05182.1|	Up
TRINITY_DN11624_c0_g1	5.60317	4.22581	6.06364e-07	3.22103e-05	2.427	0	3.338	19.805	83.307	209.211	hypothetical protein CCM_06405 [Cordyceps militaris CM01]	2e-47	gi|573987375|ref|XP_006671608.1|	Up
TRINITY_DN1087_c0_g1	5.59758	5.81831	4.66804e-20	2.41914e-17	2.465	2.884	4.528	129.936	166.489	193.52	hypothetical protein MAJ_11302, partial [Metarhizium majus ARSEF 297]	1e-163	gi|743656395|gb|KID83798.1|	Up
TRINITY_DN951_c0_g1	5.595	1.09313	0.00378767	0.0438205	0	0	0	2.38	13.965	27.559	hypothetical protein CCM_08033 [Cordyceps militaris CM01]	1e-58	gi|573990629|ref|XP_006673235.1|	Up
TRINITY_DN5542_c1_g3	5.59275	1.12212	0.0124651	0.104357	0	0	0	22.3	0	3.675	phthalate transporter [Cordyceps militaris CM01]	1e-63	gi|573986765|ref|XP_006671303.1|	Up
TRINITY_DN1719_c0_g1	5.59275	1.12212	0.0124671	0.104357	0	0	0	23.045	0	3.446	.	.	.
TRINITY_DN5315_c4_g1	5.59222	1.09213	0.00342148	0.0406517	0	0	0	4.101	28.837	44.198	pfs domain-containing protein [Cordyceps militaris CM01]	6e-65	gi|573981923|ref|XP_006668882.1|	Up
TRINITY_DN3650_c0_g1	5.58879	1.08774	0.0329117	0.205567	0	0.058	0.097	0	4.978	0	hypothetical protein CCM_01905 [Cordyceps militaris CM01]	0	gi|573978354|ref|XP_006667122.1|	Up
TRINITY_DN1757_c0_g1	5.57494	1.11571	0.0187522	0.138654	0	0	0	30.978	2.119	0	.	.	.
TRINITY_DN3525_c1_g1	5.57309	1.09611	0.00332969	0.0400109	0	0	0	17.033	11.877	2.043	galactose-1-phosphate uridylyltransferase [Cordyceps militaris CM01]	6e-128	gi|573991827|ref|XP_006673834.1|	Up
TRINITY_DN3930_c1_g1	5.56311	1.07927	0.00297275	0.0368872	0	0	0	9.912	5.772	29.67	Fungal transcriptional regulatory protein [Cordyceps militaris CM01]	4e-39	gi|573978164|ref|XP_006667027.1|	Up
TRINITY_DN3034_c0_g1	5.5568	1.07726	0.00152653	0.0220651	0	0	0	7.217	9.425	20.621	hypothetical protein CCM_01058 [Cordyceps militaris CM01]	9e-16	gi|573976668|ref|XP_006666279.1|	Up
TRINITY_DN4784_c0_g1	5.54772	2.41817	0.000551788	0.00982071	0	0	0.387	17.645	8.965	0.514	MFS monocarboxylate transporter [Cordyceps militaris CM01]	0	gi|573985981|ref|XP_006670911.1|	Up
TRINITY_DN5596_c0_g1	5.54389	1.08542	0.00976645	0.0883846	0	0	0	5.276	0	1.94	hypothetical protein CCM_06758 [Cordyceps militaris CM01]	2e-163	gi|573988081|ref|XP_006671961.1|	Up
TRINITY_DN5391_c0_g2	5.54123	1.06901	0.00357603	0.0420625	0	0	0	13.487	2.62	24.227	.	.	.
TRINITY_DN9353_c0_g1	5.53897	1.04838	0.0366051	0.219232	0	0	0	0	0	34.874	SET domain protein [Cordyceps militaris CM01]	3e-109	gi|573978456|ref|XP_006667173.1|	Up
TRINITY_DN1894_c0_g1	5.52882	1.06338	0.00327148	0.0394819	0	0	0	16.297	2.714	22.31	.	.	.
TRINITY_DN4063_c1_g1	5.51651	1.05774	0.00311104	0.0380228	0	0	0	20.369	2.964	21.329	.	.	.
TRINITY_DN6151_c0_g1	5.50276	5.33749	9.33724e-16	2.9379e-13	0.803	0.567	0.59	19.681	39.076	32.284	ankyrin, putative [Cordyceps militaris CM01]	0	gi|573987233|ref|XP_006671537.1|	Up
TRINITY_DN5736_c0_g13	5.49732	1.03307	0.0394161	0.229895	0	0	0	0	12.378	0	glucokinase regulator family protein, putative [Cordyceps militaris CM01]	1e-125	gi|573975538|ref|XP_006665714.1|	Up
TRINITY_DN4185_c1_g2	5.49612	2.41937	0.00248191	0.0319206	0	0.26	0	0	22.293	6.003	hypothetical protein CCM_08070 [Cordyceps militaris CM01]	0	gi|573990703|ref|XP_006673272.1|	Up
TRINITY_DN1245_c0_g2	5.49327	1.03448	0.00461397	0.0508749	0.302	0	0	1.262	11.167	8.41	.	.	.
TRINITY_DN2502_c0_g1	5.49141	1.04646	0.00418734	0.047478	0	0	0	13.85	1.607	8.296	alcohol dehydrogenase, putative [Cordyceps militaris CM01]	7e-100	gi|573993243|ref|XP_006674542.1|	Up
TRINITY_DN3034_c0_g2	5.49078	1.04746	0.00937689	0.0860077	0	0	0	18.113	0	11.435	hypothetical protein CCM_01058 [Cordyceps militaris CM01]	1e-15	gi|573976668|ref|XP_006666279.1|	Up
TRINITY_DN4110_c0_g2	5.48219	3.06581	5.6235e-07	3.01174e-05	0	0.558	0.445	15.934	16.104	19.64	.	.	.
TRINITY_DN6751_c1_g1	5.47979	1.06324	0.0364519	0.218586	0	0	0	40.594	0	0	oxalate decarboxylase oxdC, putative [Cordyceps militaris CM01]	9e-70	gi|573992005|ref|XP_006673923.1|	Up
TRINITY_DN1414_c0_g2	5.47979	1.06324	0.03646	0.218586	0	0	0	5.802	0	0	DNA repair protein rad32 [Cordyceps militaris CM01]	0	gi|573978802|ref|XP_006667346.1|	Up
TRINITY_DN908_c0_g1	5.47135	1.02606	0.00196722	0.0265612	0	0	0	6.165	11.679	14.949	.	.	.
TRINITY_DN1673_c0_g1	5.46271	1.03617	0.010819	0.0949841	0	0	0	32.173	0	12.838	.	.	.
TRINITY_DN11005_c0_g1	5.45876	3.05582	1.28202e-05	0.000445546	1.228	1.433	0	14.997	84.111	32.957	.	.	.
TRINITY_DN5675_c1_g1	5.44115	5.9322	2.27361e-08	1.79646e-06	0.718	3.346	2.961	210.569	10.907	83.34	cytochrome P450 monooxygenase, putative [Cordyceps militaris CM01]	0	gi|573991089|ref|XP_006673465.1|	Up
TRINITY_DN6495_c0_g1	5.43475	8.03369	2.64155e-09	2.62499e-07	11.247	19.44	15.761	62.215	477.112	1453.51	hypothetical protein CCM_02122 [Cordyceps militaris CM01]	4e-71	gi|573978786|ref|XP_006667338.1|	Up
TRINITY_DN5233_c0_g2	5.43419	1.00779	0.00150565	0.021897	0	0	0	9.396	11.752	5.672	Tat pathway signal sequence domain protein [Cordyceps militaris CM01]	3e-84	gi|573980090|ref|XP_006667990.1|	Up
TRINITY_DN3860_c1_g1	5.42619	0.987783	0.0132551	0.108529	0	0	0	0	12.096	45.407	monooxygenase, putative [Cordyceps militaris CM01]	3e-71	gi|573978426|ref|XP_006667158.1|	Up
TRINITY_DN10159_c0_g1	5.412	0.997303	0.00279748	0.0352334	0	0	0	13.993	10.166	4.188	hypothetical protein CCM_02547 [Cordyceps militaris CM01]	7e-40	gi|573979634|ref|XP_006667762.1|	Up
TRINITY_DN6023_c2_g1	5.40874	2.98246	4.71595e-05	0.00132528	6.714	0	0	24.154	169.349	152.746	.	.	.
TRINITY_DN5887_c0_g4	5.39962	0.976331	0.0427197	0.24297	0	0	0	0	9.289	0	ADP-ribosylation factor 6 [Cordyceps militaris CM01]	6e-122	gi|573993885|ref|XP_006674863.1|	Up
TRINITY_DN10887_c0_g6	5.39962	0.976331	0.0427062	0.24297	0	0	0	0	2.244	0	phosphatidylserine decarboxylase Psd2, putative [Cordyceps militaris CM01]	0	gi|573991405|ref|XP_006673623.1|	Up
TRINITY_DN2899_c0_g2	5.39802	2.95	3.08328e-05	0.000931496	0	0	1.471	10.113	49.993	19.959	hypothetical protein Z517_08578 [Fonsecaea pedrosoi CBS 271.37]	2e-20	gi|759302332|gb|KIW78739.1|
TRINITY_DN5172_c2_g1	5.39139	0.9909	0.0111429	0.0971487	0	0	0	14.892	0	8.924	.	.	.
TRINITY_DN6142_c1_g1	5.37707	0.983089	0.00526054	0.056761	0	0	0	19.136	4.039	4.165	.	.	.
TRINITY_DN2767_c0_g1	5.3757	0.97019	0.00320334	0.0389261	0	0	0	3.737	3.778	11.891	hypothetical protein CCM_07953 [Cordyceps militaris CM01]	4e-82	gi|573990471|ref|XP_006673156.1|	Up
TRINITY_DN1441_c0_g1	5.36737	0.967064	0.00216034	0.028642	0	0	0	20.914	49.346	41.733	hypothetical protein CCM_07616 [Cordyceps militaris CM01]	4e-41	gi|573989799|ref|XP_006672820.1|	Up
TRINITY_DN10055_c0_g1	5.36115	0.979371	0.0136683	0.111395	0	0	0	11.059	0	3.195	Aldo/keto reductase [Cordyceps militaris CM01]	8e-99	gi|573981513|ref|XP_006668677.1|	Up
TRINITY_DN4418_c0_g1	5.35935	0.963278	0.0018773	0.0256944	0	0	0	6.184	7.181	11.115	metallopeptidase MepB [Cordyceps militaris CM01]	3e-136	gi|573991715|ref|XP_006673778.1|	Up
TRINITY_DN1783_c0_g1	5.34213	0.954659	0.00439881	0.0490861	0	0	0	14.987	2.912	20.929	.	.	.
TRINITY_DN5717_c0_g1	5.34187	3.3609	2.26694e-07	1.38693e-05	0	0	0.939	15.58	14.935	17.882	ankyrin repeat-containing domain [Cordyceps militaris CM01]	1e-156	gi|573985879|ref|XP_006670860.1|	Up
TRINITY_DN3834_c0_g1	5.33948	2.25209	3.45375e-05	0.00102277	2.361	0	0	29.086	53.635	52.22	.	.	.
TRINITY_DN11616_c0_g1	5.33812	0.952573	0.00184029	0.0253526	0	0	0	13.047	7.588	13.021	hypothetical protein CCM_03251 [Cordyceps militaris CM01]	6e-110	gi|573981089|ref|XP_006668465.1|	Up
TRINITY_DN3762_c1_g1	5.33642	7.73259	3.87388e-18	1.58739e-15	14.023	8.451	9.376	321.102	247.448	712.388	monocarboxylate permease, putative [Cordyceps militaris CM01]	0	gi|573985899|ref|XP_006670870.1|	Up
TRINITY_DN6014_c2_g1	5.33406	4.23672	4.44053e-09	4.11801e-07	0.746	0.433	1.026	39.906	42.228	13.683	phosphatidylserine decarboxylase family protein [Cordyceps militaris CM01]	0	gi|573986693|ref|XP_006671267.1|	Up
TRINITY_DN1476_c0_g1	5.3332	5.67905	1.1302e-11	1.64579e-09	2.786	2.442	0.958	155.762	27.094	67.272	FAD binding domain protein [Cordyceps militaris CM01]	0	gi|573992733|ref|XP_006674287.1|	Up
TRINITY_DN6112_c1_g1	5.33002	0.949825	0.0101936	0.0911736	0	0	0	1.443	0	1.666	Protein kinase domain-containing protein [Cordyceps militaris CM01]	0	gi|573979632|ref|XP_006667761.1|	Up
TRINITY_DN7042_c0_g1	5.32712	0.967832	0.0216886	0.153784	0	0	0	38.319	0	3.275	.	.	.
TRINITY_DN11587_c0_g1	5.32627	0.946696	0.00268418	0.0340744	0	0	0	23.313	11.668	15.931	RNase3 domain protein [Cordyceps militaris CM01]	6e-64	gi|573993067|ref|XP_006674454.1|	Up
TRINITY_DN908_c0_g2	5.32457	7.25838	5.59187e-21	3.51888e-18	8.858	4.711	8.147	189.254	337.153	344.942	methoxy mycolic acid synthase 1 [Cordyceps militaris CM01]	0	gi|573979686|ref|XP_006667788.1|	Up
TRINITY_DN6812_c0_g1	5.31689	6.32791	4.73703e-22	3.62898e-19	5.874	6.884	10.788	313.283	315.486	322.324	Cupredoxin [Cordyceps militaris CM01]	4e-89	gi|573983037|ref|XP_006669439.1|	Up
TRINITY_DN4132_c0_g1	5.31488	0.941859	0.00372405	0.0432979	0	0	0	17.683	5.145	10.59	.	.	.
TRINITY_DN953_c0_g2	5.31109	0.942523	0.0120507	0.102477	0	0	0	4.206	4.864	0	DASH complex subunit DAD2, putative [Cordyceps militaris CM01]	1e-28	gi|573992415|ref|XP_006674128.1|	Up
TRINITY_DN8368_c0_g1	5.30971	6.75687	2.07166e-13	4.2445e-11	4.627	6.624	8.514	92.266	182.103	511.336	amidinotransferase [Cordyceps militaris CM01]	0	gi|573984549|ref|XP_006670195.1|	Up
TRINITY_DN87_c0_g2	5.3058	0.96206	0.0440299	0.247072	0	0	0	7.685	0	0	Nucleotide-binding, alpha-beta plait [Cordyceps militaris CM01]	9e-136	gi|573978082|ref|XP_006666986.1|	Up
TRINITY_DN10125_c1_g1	5.30405	0.923042	0.0110049	0.0962317	0	0	0	2.791	6.523	33.448	hypothetical protein TSTA_022640 [Talaromyces stipitatus ATCC 10500]	5e-16	gi|242804775|ref|XP_002484444.1|	Up
TRINITY_DN11315_c0_g1	5.30404	0.922659	0.0138566	0.112413	0	0	0	0	26.875	17.232	hypothetical protein CCM_06110 [Cordyceps militaris CM01]	2e-22	gi|573986787|ref|XP_006671314.1|	Up
TRINITY_DN5406_c0_g2	5.30404	0.922659	0.0138508	0.112413	0	0	0	0	8.391	5.421	hypothetical protein CCM_01833 [Cordyceps militaris CM01]	8e-84	gi|573978210|ref|XP_006667050.1|	Up
TRINITY_DN3063_c0_g2	5.30025	0.938065	0.0127204	0.10559	0	0	0	12.713	0	8.479	.	.	.
TRINITY_DN6557_c1_g1	5.29889	3.99145	0.000112686	0.00269406	2.54	0.99	0.774	164.145	8.016	9.323	DNA methyltransferase Dim-2 [Cordyceps militaris CM01]	0	gi|573982243|ref|XP_006669042.1|	Up
TRINITY_DN1453_c0_g1	5.29884	2.19615	0.000635973	0.0110077	0	0	0.648	2.16	27.585	8.65	hypothetical protein CCM_04698 [Cordyceps militaris CM01]	0	gi|573983975|ref|XP_006669908.1|	Up
TRINITY_DN9656_c0_g1	5.2957	0.920917	0.00724668	0.0713332	0	0	0	2.017	9.393	19.354	hypothetical protein CCM_02496 [Cordyceps militaris CM01]	5e-60	gi|573979532|ref|XP_006667711.1|	Up
TRINITY_DN5354_c0_g2	5.29494	0.917345	0.0482208	0.260709	0	0	0	0	3.622	0	polyphosphoinositide phosphatase Fig4 [Cordyceps militaris CM01]	0	gi|573975330|ref|XP_006665610.1|	Up
TRINITY_DN9298_c0_g1	5.28608	4.39678	2.32039e-09	2.36332e-07	2.493	0.731	1.142	26.668	80.176	73.126	hypothetical protein CCM_05323 [Cordyceps militaris CM01]	0	gi|573985219|ref|XP_006670530.1|	Up
TRINITY_DN2447_c0_g1	5.28045	0.913476	0.0147821	0.117642	0	0	0	2.676	34.379	3.207	hypothetical protein CCM_03508 [Cordyceps militaris CM01]	6e-44	gi|573981603|ref|XP_006668722.1|	Up
TRINITY_DN10354_c0_g1	5.26046	8.18375	1.96848e-06	8.73669e-05	6.865	27.227	7.363	315.003	18.432	1238.32	hypothetical protein CCM_09664 [Cordyceps militaris CM01]	0	gi|573993879|ref|XP_006674860.1|	Up
TRINITY_DN5560_c0_g2	5.25404	3.24694	0.00227271	0.0298399	0	0	0.629	0	19.58	12.61	urea active transporter [Cordyceps militaris CM01]	0	gi|573981429|ref|XP_006668635.1|	Up
TRINITY_DN161_c1_g1	5.25401	0.903607	0.00779227	0.0752774	0	0	0	7.886	27.564	3.15	cytochrome P450 family protein, putative [Cordyceps militaris CM01]	8e-32	gi|573993241|ref|XP_006674541.1|	Up
TRINITY_DN10475_c0_g1	5.24944	0.901177	0.0133497	0.109253	0	0	0	23.819	0	45.59	.	.	.
TRINITY_DN5626_c7_g1	5.24673	6.46846	4.92344e-15	1.35549e-12	16.988	16.604	12.975	231.435	550.912	988.061	heat-stable 19 kDa antigen precursor [Cordyceps militaris CM01]	1e-73	gi|573992995|ref|XP_006674418.1|	Up
TRINITY_DN8695_c0_g1	5.24628	0.900797	0.00264904	0.0337255	0	0	0	10.552	18.452	9.472	MFS alpha-glucoside transporter [Cordyceps militaris CM01]	3e-88	gi|573986649|ref|XP_006671245.1|	Up
TRINITY_DN200_c0_g1	5.24628	0.900797	0.00264643	0.0337166	0	0	0	7.551	12.065	6.219	benzoate 4-monooxygenase cytochrome P450 [Cordyceps militaris CM01]	9e-73	gi|573981095|ref|XP_006668468.1|	Up
TRINITY_DN4699_c1_g2	5.23024	0.893046	0.00307756	0.0378363	0	0	0	4.617	1.659	4.576	metal ion resistance protein/transporter (Zrc1), putative [Cordyceps militaris CM01]	9e-39	gi|573991995|ref|XP_006673918.1|	Up
TRINITY_DN3352_c0_g2	5.22651	0.890918	0.00328179	0.0395791	0	0	0	6.624	5.271	3.971	hypothetical protein CCM_03920 [Cordyceps militaris CM01]	5e-54	gi|573982421|ref|XP_006669131.1|	Up
TRINITY_DN6122_c0_g1	5.22522	5.12606	1.33169e-07	8.59503e-06	1.039	1.269	0	5.601	45.547	36.552	MFS monocarboxylate transporter [Cordyceps militaris CM01]	0	gi|573985981|ref|XP_006670911.1|	Up
TRINITY_DN3421_c0_g2	5.22237	0.868957	0.0552923	0.283174	0	0	0	0	0	6.06	MMP37-like protein [Cordyceps militaris CM01]	0	gi|573993069|ref|XP_006674455.1|	Up
TRINITY_DN11733_c0_g1	5.22237	0.868957	0.0552873	0.283174	0	0	0	0	0	68.39	tyrosinase, putative [Cordyceps militaris CM01]	4e-55	gi|573978660|ref|XP_006667275.1|	Up
TRINITY_DN2322_c0_g3	5.22237	0.868957	0.0552743	0.283174	0	0	0	0	0	16.091	hypothetical protein CCM_01849 [Cordyceps militaris CM01]	3e-76	gi|573978242|ref|XP_006667066.1|	Up
TRINITY_DN993_c0_g2	5.21834	0.889169	0.0147203	0.117309	0	0	0	3.145	0	3.115	hypothetical protein CCM_00793 [Cordyceps militaris CM01]	9e-85	gi|573976140|ref|XP_006666015.1|	Up
TRINITY_DN495_c0_g1	5.20991	0.908627	0.050462	0.269029	0	0	0	18.715	0	0	hypothetical protein CCM_08007 [Cordyceps militaris CM01]	4e-31	gi|573990577|ref|XP_006673209.1|	Up
TRINITY_DN4017_c0_g2	5.20991	0.908627	0.0504772	0.269029	0	0	0	8.927	0	0	.	.	.
TRINITY_DN227_c1_g1	5.20265	0.883161	0.0149577	0.118665	0	0	0	24.775	0	18.521	.	.	.
TRINITY_DN5871_c0_g2	5.19376	4.32461	4.773e-05	0.00133705	0	2.221	2.467	3.03	105.016	85.497	LysM domain protein [Cordyceps militaris CM01]	6e-175	gi|573977942|ref|XP_006666916.1|	Up
TRINITY_DN660_c0_g1	5.1805	9.18601	2.16753e-06	9.50049e-05	25.166	9.355	19.477	43.806	1764.63	123.829	putative glycosyltransferase [Cordyceps militaris CM01]	0	gi|573993667|ref|XP_006674754.1|	Up
TRINITY_DN5053_c0_g1	5.17599	6.80437	1.03813e-06	5.10945e-05	2.71	11.893	0	59.032	364.394	93.405	SCP-like extracellular protein, putative [Cordyceps militaris CM01]	1e-109	gi|573984319|ref|XP_006670080.1|	Up
TRINITY_DN7737_c0_g1	5.17094	0.855232	0.00807122	0.0771943	0	0	0	2.218	18.077	10.624	2-oxoglutarate-dependent ethylene/succinate-forming enzyme [Cordyceps militaris CM01]	1e-95	gi|573984565|ref|XP_006670203.1|	Up
TRINITY_DN5675_c0_g1	5.17088	2.11568	0.0208764	0.149579	0	0	0.387	20.55	0	0	alcohol dehydrogenase, putative [Cordyceps militaris CM01]	0	gi|573991087|ref|XP_006673464.1|	Up
TRINITY_DN5186_c1_g1	5.17081	3.53248	9.17751e-05	0.00229048	0.548	0	1.5	1.663	28.848	53.133	hypothetical protein BBA_03548 [Beauveria bassiana ARSEF 2860]	2e-79	gi|667650071|ref|XP_008596867.1|	Up
TRINITY_DN5763_c0_g2	5.16423	3.86753	1.93251e-08	1.56196e-06	1.218	2.788	2.341	83.415	96.093	53.407	Fungal transcriptional regulatory protein [Cordyceps militaris CM01]	6e-21	gi|573985685|ref|XP_006670763.1|	Up
TRINITY_DN6124_c1_g1	5.15953	6.31439	4.06172e-11	5.26231e-09	13.098	10.912	15.597	117.787	447.618	61.966	hypothetical protein CCM_06802 [Cordyceps militaris CM01]	7e-140	gi|573988165|ref|XP_006672003.1|	Up
TRINITY_DN5748_c0_g1	5.15913	4.90087	1.02525e-09	1.10828e-07	4.608	1.183	0	97.552	50.702	61.087	hypothetical protein CCM_01308 [Cordyceps militaris CM01]	2e-62	gi|573977164|ref|XP_006666527.1|	Up
TRINITY_DN59_c1_g1	5.15594	2.08772	0.000178656	0.00392508	0	0	0.764	5.104	17.743	18.361	hypothetical protein CCM_09555 [Cordyceps militaris CM01]	3e-105	gi|573993661|ref|XP_006674751.1|	Up
TRINITY_DN3167_c0_g2	5.14587	5.53438	2.50469e-07	1.50111e-05	3.739	0	0	29.65	48.552	56.271	hypothetical protein CCM_01733 [Cordyceps militaris CM01]	0	gi|573978012|ref|XP_006666951.1|	Up
TRINITY_DN4380_c1_g1	5.13165	0.859115	0.028157	0.183955	0	0	0	42.286	0	4.211	.	.	.
TRINITY_DN9280_c0_g1	5.12843	0.85805	0.0281694	0.183968	0	0	0	53.106	5.187	0	.	.	.
TRINITY_DN10272_c0_g1	5.12843	0.85805	0.0281823	0.183984	0	0	0	35.022	3.402	0	RNA binding protein MSSP-2 [Cordyceps militaris CM01]	2e-47	gi|573988093|ref|XP_006671967.1|	Up
TRINITY_DN9155_c0_g1	5.10879	2.73662	9.5366e-05	0.00236669	0	0.942	0.735	10.629	8.527	48.032	.	.	.
TRINITY_DN4748_c0_g1	5.10741	0.853099	0.0570709	0.287336	0	0	0	8.019	0	0	RAS small monomeric GTPase Rab6 [Cordyceps militaris CM01]	4e-68	gi|573975444|ref|XP_006665667.1|	Up
TRINITY_DN10545_c0_g1	5.1074	0.853099	0.0570921	0.287336	0	0	0	25.091	0	0	muramidase, putative [Cordyceps militaris CM01]	6e-76	gi|573993643|ref|XP_006674742.1|	Up
TRINITY_DN4041_c0_g1	5.10461	7.22995	3.55174e-11	4.67027e-09	13.069	18.046	14.116	175.185	1156.85	228.349	caleosin domain containing protein [Cordyceps militaris CM01]	3e-150	gi|573991153|ref|XP_006673497.1|	Up
TRINITY_DN4537_c3_g1	5.09922	0.804091	0.0616911	0.300691	0	0	0	0	0	37.75	putative RNA-dependent RNA polymerase [Cherry chlorotic rusty spot associated totiviral-like dsRNA 4]	6e-18	gi|104161954|emb|CAJ57274.1|	Up
TRINITY_DN11464_c0_g1	5.0989	3.95676	4.64896e-05	0.00130854	0	0	4.702	8.698	81.648	88.646	F-box domain-containing protein [Beauveria bassiana ARSEF 2860]	2e-12	gi|667658585|ref|XP_008601124.1|	Up
TRINITY_DN2909_c0_g1	5.09855	0.824933	0.00845629	0.0797644	0	0	0	22.194	3.705	15.178	extracellular protein [Cordyceps militaris CM01]	7e-63	gi|573991889|ref|XP_006673865.1|	Up
TRINITY_DN10714_c0_g1	5.09796	2.04752	0.00430949	0.0483959	3.041	0	0	0	102.167	44.882	.	.	.
TRINITY_DN3837_c0_g1	5.09621	0.825643	0.0172619	0.130819	0	0	0	5.85	7.128	0	Major facilitator superfamily transporter [Cordyceps militaris CM01]	4e-91	gi|573986855|ref|XP_006671348.1|	Up
TRINITY_DN778_c0_g1	5.09578	0.822761	0.0060972	0.0629735	0	0	0	12.865	6.408	4.405	forkhead domain-containing protein [Cordyceps militaris CM01]	7e-119	gi|573974864|ref|XP_006665377.1|	Up
TRINITY_DN5917_c1_g1	5.08281	4.92251	1.06298e-06	5.18829e-05	6.223	7.307	11.388	23.37	548.845	302.753	eukaroytic elongation factor 2 kinase [Cordyceps militaris CM01]	2e-29	gi|573986597|ref|XP_006671219.1|	Up
TRINITY_DN3696_c0_g1	5.08236	4.01564	1.22591e-08	1.04857e-06	1.445	0.423	0.329	33.913	17.064	27.867	NADP-specific glutamate dehydrogenase [Cordyceps militaris CM01]	0	gi|573977316|ref|XP_006666603.1|	Up
TRINITY_DN1810_c0_g1	5.08197	0.817707	0.00799785	0.0767132	0	0	0	25.731	7.515	7.703	Rho GTPase activation protein [Cordyceps militaris CM01]	9e-25	gi|573993385|ref|XP_006674613.1|	Up
TRINITY_DN10554_c0_g1	5.08088	0.819879	0.0184542	0.13691	0	0	0	27.04	0	16.182	zinc knuckle transcription factor (CnjB), putative [Cordyceps militaris CM01]	5e-16	gi|573992799|ref|XP_006674320.1|	Up
TRINITY_DN4633_c0_g2	5.05394	0.810479	0.0202774	0.14685	0	0	0	7.58	2.484	0	hypothetical protein CCM_01685 [Cordyceps militaris CM01]	2e-65	gi|573977916|ref|XP_006666903.1|	Up
TRINITY_DN8016_c0_g1	5.04533	0.806508	0.0168636	0.12919	0	0	0	21.955	2.557	2.625	.	.	.
TRINITY_DN4147_c0_g1	5.04233	0.789331	0.00902792	0.083678	0	0	0	3.584	4.164	15.029	ankyrin repeat-containing domain [Cordyceps militaris CM01]	1e-119	gi|573991965|ref|XP_006673903.1|	Up
TRINITY_DN9540_c0_g1	5.03744	0.788223	0.00672291	0.0678452	0	0	0	8.794	15.457	31.565	.	.	.
TRINITY_DN780_c0_g1	5.03698	0.785275	0.022097	0.155736	0	0	0	10.514	0	33.55	Fungal transcriptional regulatory protein [Cordyceps militaris CM01]	3e-69	gi|573978164|ref|XP_006667027.1|	Up
TRINITY_DN4264_c0_g1	5.02932	7.22034	9.25088e-15	2.36233e-12	4.098	1.769	4.431	45.985	135.377	154.423	Cytochrome P450 CYP584E7 [Beauveria bassiana ARSEF 2860]	0	gi|667651333|ref|XP_008597498.1|	Up
TRINITY_DN2627_c2_g1	5.02317	0.80145	0.0318278	0.200934	0	0	0	29.019	0	3.161	.	.	.
TRINITY_DN4600_c4_g1	5.01874	0.78084	0.00422014	0.0476401	0	0	0	9.797	15.248	15.623	ankyrin 2,3/unc44, putative [Cordyceps militaris CM01]	4e-73	gi|573974964|ref|XP_006665427.1|	Up
TRINITY_DN8583_c0_g1	5.01679	0.779732	0.00461772	0.0508845	0	0	0	6.939	13.464	8.308	short-chain dehydrogenase, putative [Cordyceps militaris CM01]	4e-45	gi|573990451|ref|XP_006673146.1|	Up
TRINITY_DN11314_c0_g1	4.99892	4.25775	1.84319e-07	1.14356e-05	1.605	0	10.314	179.113	76.377	163.416	hypothetical protein CCM_06757 [Cordyceps militaris CM01]	8e-12	gi|573988079|ref|XP_006671960.1|	Up
TRINITY_DN3741_c1_g1	4.99758	0.770506	0.0069342	0.069342	0	0	0	22.72	10.656	21.739	short chain dehydrogenase/reductase, putative [Cordyceps militaris CM01]	1e-63	gi|573988241|ref|XP_006672041.1|	Up
TRINITY_DN11695_c0_g1	4.99647	0.77124	0.0232508	0.161354	0	0	0	6.576	13.37	0	DEAD/DEAH box helicase, putative [Cordyceps militaris CM01]	1e-90	gi|573988075|ref|XP_006671958.1|	Up
TRINITY_DN3105_c1_g1	4.99647	0.77124	0.0232711	0.161432	0	0	0	11.135	22.721	0	hypothetical protein CCM_06427 [Cordyceps militaris CM01]	4e-20	gi|573987421|ref|XP_006671631.1|	Up
TRINITY_DN1349_c0_g2	4.99139	3.46174	0.00187963	0.0256944	0.585	0.692	0	0	9.383	33.471	hypothetical protein CCM_07978 [Cordyceps militaris CM01]	0	gi|573990521|ref|XP_006673181.1|	Up
TRINITY_DN59_c0_g1	4.9886	2.64583	4.4154e-05	0.00125686	0.67	0.788	0	6.146	22.94	22.938	hypothetical protein CCM_09555 [Cordyceps militaris CM01]	0	gi|573993661|ref|XP_006674751.1|	Up
TRINITY_DN2436_c0_g1	4.98763	2.67347	0.000121068	0.00285571	0	1.327	0	4.617	14.048	26.338	hypothetical protein CCM_06118 [Cordyceps militaris CM01]	0	gi|573986803|ref|XP_006671322.1|	Up
TRINITY_DN11773_c0_g1	4.98441	0.765338	0.0103083	0.0920121	0	0	0	22.07	4.3	17.608	.	.	.
TRINITY_DN3375_c1_g1	4.9844	0.765338	0.0103247	0.0920654	0	0	0	19.212	3.736	15.326	.	.	.
TRINITY_DN6310_c0_g5	4.98359	6.03935	0.00924444	0.0850862	0	12.825	0	36.13	365.886	0	speract/scavenger receptor domain-containing protein [Cordyceps militaris CM01]	1e-61	gi|573975136|ref|XP_006665513.1|	Up
TRINITY_DN5547_c0_g1	4.98245	0.766072	0.0214053	0.152389	0	0	0	16.918	22.867	0	penicillin-binding protein, putative [Cordyceps militaris CM01]	2e-58	gi|573990677|ref|XP_006673259.1|	Up
TRINITY_DN2574_c0_g1	4.9665	4.84746	2.72696e-09	2.66939e-07	0	2.067	1.645	21.812	56.151	42.052	hypothetical protein CCM_07653 [Cordyceps militaris CM01]	3e-89	gi|573989871|ref|XP_006672856.1|	Up
TRINITY_DN753_c0_g2	4.96481	0.736329	0.0713185	0.328011	0	0	0	0	0	10.042	.	.	.
TRINITY_DN6289_c0_g1	4.96181	3.11881	5.99104e-05	0.0016141	0	3.336	0	11.021	55.566	40.329	.	.	.
TRINITY_DN1998_c0_g1	4.95445	2.60735	1.81768e-05	0.000597702	0	0.74	0.581	11.556	12.639	23.097	Cytochrome P450 [Cordyceps militaris CM01]	0	gi|573975770|ref|XP_006665830.1|	Up
TRINITY_DN4088_c0_g2	4.94805	0.753889	0.0239744	0.164393	0	0	0	8.096	0	3.834	choline transport protein, putative [Cordyceps militaris CM01]	7e-109	gi|573991833|ref|XP_006673837.1|	Up
TRINITY_DN8933_c0_g1	4.94775	0.751672	0.0140739	0.113649	0	0	0	18.763	5.458	2.807	.	.	.
TRINITY_DN5127_c0_g1	4.93241	0.729534	0.0231943	0.161089	0	0	0	0	10.406	6.402	Endoribonuclease L-PSP/chorismate mutase-like protein [Cordyceps militaris CM01]	2e-94	gi|573992165|ref|XP_006674003.1|	Up
TRINITY_DN2741_c0_g1	4.93093	1.92767	0.00205315	0.0274064	0.935	0	0	12.359	1.106	26.224	.	.	.
TRINITY_DN11451_c0_g1	4.92998	0.728401	0.0256479	0.172296	0	0	0	0	27.366	12.017	catechol O-methyltransferase [Cordyceps militaris CM01]	2e-60	gi|573987795|ref|XP_006671818.1|	Up
TRINITY_DN2382_c1_g1	4.92943	0.746501	0.0197731	0.144325	0	0	0	14.29	1.847	1.906	hypothetical protein CCM_09585 [Cordyceps militaris CM01]	3e-23	gi|573993721|ref|XP_006674781.1|	Up
TRINITY_DN4532_c1_g1	4.92802	0.74761	0.0283452	0.18468	0	0	0	24.737	0	6.573	.	.	.
TRINITY_DN2717_c0_g5	4.92569	0.725004	0.0697784	0.323807	0	0	0	0	17.388	0	.	.	.
TRINITY_DN6013_c0_g4	4.92569	0.725004	0.0697582	0.323799	0	0	0	0	8.548	0	hypothetical protein CCM_03058 [Cordyceps militaris CM01]	2e-149	gi|573980705|ref|XP_006668273.1|	Up
TRINITY_DN10118_c0_g1	4.92392	0.727644	0.0162236	0.125708	0	0	0	1.797	4.175	15.075	.	.	.
TRINITY_DN11360_c0_g1	4.9141	0.72538	0.0112286	0.0975582	0	0	0	3.546	16.563	21.192	.	.	.
TRINITY_DN309_c0_g1	4.91409	0.72538	0.0112246	0.0975582	0	0	0	5.888	27.71	35.239	cryptochrome-2 [Cordyceps militaris CM01]	1e-37	gi|573979324|ref|XP_006667607.1|	Up
TRINITY_DN11179_c0_g1	4.91115	0.724247	0.0111218	0.0970131	0	0	0	2.294	13.37	11.001	.	.	.
TRINITY_DN6890_c0_g1	4.89503	0.71896	0.00713551	0.0707528	0	0	0	8.163	19.11	19.525	.	.	.
TRINITY_DN5710_c0_g2	4.89336	2.59344	7.1462e-05	0.00185232	0	1.086	0	7.953	6.064	18.167	MFS transporter, putative [Cordyceps militaris CM01]	0	gi|573985607|ref|XP_006670724.1|	Up
TRINITY_DN3999_c1_g1	4.89309	3.04672	0.000140291	0.00321881	0.992	2.327	0	67.759	5.866	30.31	hypothetical protein CCM_05097 [Cordyceps militaris CM01]	1e-60	gi|573984771|ref|XP_006670306.1|	Up
TRINITY_DN7848_c0_g2	4.89308	0.717827	0.00773843	0.0748771	0	0	0	3.546	13.756	8.65	.	.	.
TRINITY_DN3010_c1_g1	4.89308	0.717827	0.00773628	0.0748771	0	0	0	20.244	60.148	36.449	.	.	.
TRINITY_DN7134_c0_g1	4.88627	0.714804	0.00756969	0.0737857	0	0	0	13.276	10.374	26.475	.	.	.
TRINITY_DN7931_c0_g1	4.88278	0.713672	0.00585992	0.0617534	0	0	0	15.809	18.578	25.231	.	.	.
TRINITY_DN5310_c2_g1	4.88045	0.712539	0.00576574	0.0610164	0	0	0	10.973	17.106	13.135	.	.	.
TRINITY_DN4820_c1_g1	4.87966	2.51421	0.000192625	0.00419018	1.511	0	1.384	12.34	21.5	72.076	hypothetical protein CCM_03693 [Cordyceps militaris CM01]	1e-69	gi|573981969|ref|XP_006668905.1|	Up
TRINITY_DN788_c0_g1	4.87728	0.735049	0.0761754	0.342052	0	0	0	45.708	0	0	.	.	.
TRINITY_DN5027_c2_g1	4.87205	0.708383	0.00948599	0.0866248	0	0	0	13.458	7.859	16.102	hypothetical protein CCM_01568 [Cordyceps militaris CM01]	4e-44	gi|573977684|ref|XP_006666787.1|	Up
TRINITY_DN989_c0_g1	4.86989	0.70725	0.00820355	0.078091	0	0	0	13.592	11.908	12.199	.	.	.
TRINITY_DN10071_c0_g1	4.86523	1.87644	0.00125896	0.0188951	0	0	0.619	16.545	8.788	1.655	.	.	.
TRINITY_DN4229_c0_g1	4.85628	0.700829	0.00946595	0.0865991	0	0.221	0	2.562	1.555	1.232	Protein kinase-like domain [Cordyceps militaris CM01]	6e-173	gi|573991831|ref|XP_006673836.1|	Up
TRINITY_DN302_c0_g1	4.85627	0.700829	0.00947784	0.0866213	0	0	0	22.424	15.77	10.727	Major facilitator superfamily transporter [Cordyceps militaris CM01]	2e-65	gi|573983743|ref|XP_006669792.1|	Up
TRINITY_DN11131_c0_g1	4.85272	5.26876	8.56047e-14	1.93379e-11	4.287	2.865	3.938	90.412	83.767	151.833	hypothetical protein CCM_06908 [Cordyceps militaris CM01]	3e-148	gi|573988377|ref|XP_006672109.1|	Up
TRINITY_DN11340_c0_g1	4.84363	0.696671	0.0140352	0.11344	0	0	0	18.323	3.559	10.967	.	.	.
TRINITY_DN5642_c2_g1	4.83822	0.694407	0.013857	0.112413	0	0	0	13.133	7.64	2.625	hypothetical protein CCM_07357 [Cordyceps militaris CM01]	4e-68	gi|573989281|ref|XP_006672561.1|	Up
TRINITY_DN8276_c0_g1	4.83821	0.694407	0.0138636	0.112414	0	0	0	38.845	22.888	7.749	.	.	.
TRINITY_DN2203_c0_g2	4.82725	5.91791	3.25357e-08	2.44991e-06	6.572	0	2.767	31.552	120.703	115.875	low affinity iron transporter, putative [Cordyceps militaris CM01]	0	gi|573983181|ref|XP_006669511.1|	Up
TRINITY_DN728_c1_g1	4.82539	0.690249	0.0169945	0.129616	0	0	0	12.512	2.077	4.279	.	.	.
TRINITY_DN7787_c0_g1	4.82538	0.690249	0.0170001	0.129616	0	0	0	21.086	3.517	7.212	.	.	.
TRINITY_DN7887_c0_g1	4.8226	0.689117	0.0167825	0.128756	0	0	0	25.607	8.558	4.382	MFS transporter, putative [Cordyceps militaris CM01]	2e-52	gi|573981529|ref|XP_006668685.1|	Up
TRINITY_DN4261_c1_g1	4.82258	0.689117	0.0167997	0.128756	0	0	0	20.254	6.753	3.458	.	.	.
TRINITY_DN5907_c1_g3	4.82156	5.06401	2.15243e-06	9.45782e-05	1.7	0	0	13.573	14.904	19.697	histone-lysine N-methyltransferase (Ash1), putative [Cordyceps militaris CM01]	0	gi|573987553|ref|XP_006671697.1|	Up
TRINITY_DN372_c0_g2	4.81233	0.687985	0.0283466	0.18468	0	0.212	0	8.555	4.488	0	adenylate cyclase, putative [Cordyceps militaris CM01]	7e-123	gi|573979332|ref|XP_006667611.1|	Up
TRINITY_DN9456_c0_g1	4.81233	0.687985	0.028359	0.18468	0	0	0	34.544	17.367	0	O-methyltransferase family protein [Cordyceps militaris CM01]	2e-53	gi|573991115|ref|XP_006673478.1|	Up
TRINITY_DN7404_c0_g1	4.81233	0.687985	0.0283623	0.18468	0	0	0	34.544	17.367	0	hypothetical protein CCM_03774 [Cordyceps militaris CM01]	2e-18	gi|573982129|ref|XP_006668985.1|	Up
TRINITY_DN2781_c0_g1	4.80834	1.88076	0.00521515	0.0563057	0	1.634	0	25.635	0	30.72	.	.	.
TRINITY_DN3005_c0_g1	4.80254	14.7742	8.66282e-07	4.3736e-05	3190.63	2266.66	1559.66	78064.5	2224.77	113405	.	.	.
TRINITY_DN2652_c1_g1	4.79433	0.682694	0.0333954	0.207631	0	0	0	87.573	26.061	0	.	.	.
TRINITY_DN4690_c0_g10	4.78448	0.659615	0.027321	0.179668	0	0	0	0	9.633	8.502	hypothetical protein CCM_08956 [Cordyceps militaris CM01]	3e-85	gi|573992467|ref|XP_006674154.1|	Up
TRINITY_DN7728_c0_g1	4.77986	5.89829	6.36818e-16	2.07791e-13	2.323	5.893	3.561	79.296	136.984	104.143	hypothetical protein CCM_06909 [Cordyceps militaris CM01]	0	gi|573988379|ref|XP_006672110.1|	Up
TRINITY_DN3768_c2_g1	4.77864	0.657672	0.0261488	0.174325	0	0	0	12.789	15.29	107.784	hypothetical protein CCM_08884 [Cordyceps militaris CM01]	1e-36	gi|573992325|ref|XP_006674083.1|	Up
TRINITY_DN4499_c3_g1	4.77374	1.82917	0.00414578	0.0471282	0.727	0	0	22.261	0.856	4.451	.	.	.
TRINITY_DN5402_c0_g1	4.77371	0.677403	0.0433429	0.245128	0	0	0	34.047	4.425	0	.	.	.
TRINITY_DN4875_c1_g1	4.77121	0.656515	0.0185734	0.137679	0	0	0	2.753	6.408	19.731	hypothetical protein CCM_07853 [Cordyceps militaris CM01]	1e-76	gi|573990271|ref|XP_006673056.1|	Up
TRINITY_DN4733_c0_g1	4.77003	4.50488	2.44028e-05	0.000759679	11.492	0	0	37.889	124.992	161.521	nucleoside-diphosphate-sugar epimerase, putative [Cordyceps militaris CM01]	3e-89	gi|573992175|ref|XP_006674008.1|	Up
TRINITY_DN9534_c0_g1	4.76895	2.97112	0.00183528	0.0253034	0	4.951	0	40.231	1.67	98.152	hypothetical protein CCM_01600 [Cordyceps militaris CM01]	7e-93	gi|573977746|ref|XP_006666818.1|	Up
TRINITY_DN11138_c0_g1	4.75919	0.653042	0.0145531	0.116451	0	0	0	3.269	19.058	11.72	hypothetical protein CCM_04867 [Cordyceps militaris CM01]	1e-50	gi|573984311|ref|XP_006670076.1|	Up
TRINITY_DN10107_c1_g1	4.74992	9.22635	1.12018e-07	7.33741e-06	17.98	25.689	22.321	71.725	237.565	1446.49	amino acid transporter, putative [Cordyceps militaris CM01]	0	gi|573978888|ref|XP_006667389.1|	Up
TRINITY_DN4799_c2_g1	4.74981	0.649941	0.0119796	0.102021	0	0	0	7.274	8.506	21.762	hypothetical protein CCM_02496 [Cordyceps militaris CM01]	1e-71	gi|573979532|ref|XP_006667711.1|	Up
TRINITY_DN4905_c0_g1	4.74904	5.04108	4.28771e-09	3.99732e-07	1.275	2.615	1.471	14.71	80.761	45.202	hypothetical protein CCM_09195 [Cordyceps militaris CM01]	2e-106	gi|573992943|ref|XP_006674392.1|	Up
TRINITY_DN5984_c0_g1	4.7469	0.672112	0.0749377	0.339208	0	0	0	11.891	0	0	Protein kinase-like domain [Cordyceps militaris CM01]	1e-77	gi|573976800|ref|XP_006666345.1|	Up
TRINITY_DN11746_c0_g1	4.74688	0.672112	0.075018	0.33945	0	0	0	26.591	0	0	.	.	.
TRINITY_DN6939_c0_g1	4.74134	0.646469	0.0115344	0.0994793	0	0	0	16.947	50.16	20.313	.	.	.
TRINITY_DN4234_c0_g1	4.73924	4.21025	1.14369e-07	7.46363e-06	2.965	0.74	1.742	21.124	65.158	65.652	RTA1 like protein [Cordyceps militaris CM01]	5e-174	gi|573988729|ref|XP_006672285.1|	Up
TRINITY_DN3077_c1_g1	4.73881	0.644155	0.0449497	0.250456	0	0	0	25.205	105.381	0	.	.	.
TRINITY_DN1664_c0_g1	4.73788	1.78794	0.000666237	0.0114194	1.52	0	0	23.303	7.212	26.053	multidrug resistance protein, putative [Cordyceps militaris CM01]	1e-91	gi|573988393|ref|XP_006672117.1|	Up
TRINITY_DN1004_c1_g6	4.73657	8.08831	3.29927e-10	3.87554e-08	25.893	20.767	22.486	175.863	1363.56	285.43	copper radical oxidase [Cordyceps militaris CM01]	6e-138	gi|573978128|ref|XP_006667009.1|	Up
TRINITY_DN9118_c0_g1	4.73429	7.34032	1.04368e-05	0.000376066	22.361	9.518	11.678	11.91	952.409	184.425	O-methyltransferase, putative [Cordyceps militaris CM01]	0	gi|573987511|ref|XP_006671676.1|	Up
TRINITY_DN8923_c0_g1	4.73333	0.643367	0.0137265	0.111714	0	0	0	7.79	6.053	12.427	.	.	.
TRINITY_DN11727_c0_g1	4.73057	0.64221	0.0119919	0.102076	0	0	0	14.098	16.532	16.867	.	.	.
TRINITY_DN1364_c0_g12	4.72613	4.43959	6.59826e-05	0.00175356	2.908	0	2.158	115.741	20.665	6.562	hypothetical protein CCM_06626 [Cordyceps militaris CM01]	0	gi|573987819|ref|XP_006671830.1|	Up
TRINITY_DN6687_c0_g1	4.7239	1.76467	0.00626598	0.0641899	0	0	1.432	33.492	0	22.938	.	.	.
TRINITY_DN4417_c2_g1	4.72148	0.637951	0.0174088	0.131447	0	0	0	7.809	2.275	9.358	urea active transporter, putative [Cordyceps militaris CM01]	6e-79	gi|573991197|ref|XP_006673519.1|	Up
TRINITY_DN3513_c0_g1	4.72147	0.637951	0.0174174	0.131447	0	0	0	11.183	3.256	13.375	.	.	.
TRINITY_DN8221_c1_g1	4.72131	3.8862	9.8598e-08	6.58755e-06	1.209	0.942	0.745	14.414	26.687	38.537	Major facilitator superfamily transporter [Cordyceps militaris CM01]	0	gi|573993695|ref|XP_006674768.1|	Up
TRINITY_DN4774_c1_g1	4.71986	0.636794	0.0127466	0.105652	0	0	0	22.261	13.077	19.971	.	.	.
TRINITY_DN4719_c1_g1	4.71986	0.636794	0.0127478	0.105652	0	0	0	12.932	7.546	11.606	multidrug resistance-associated protein 1 [Cordyceps militaris CM01]	3e-52	gi|573986795|ref|XP_006671318.1|	Up
TRINITY_DN5658_c5_g1	4.71765	0.635637	0.0125371	0.104694	0	0	0	15.752	13.818	9.415	hypothetical protein BBAD15_g5637 [Beauveria bassiana D1-5]	5e-20	gi|701774854|gb|KGQ09039.1|	Up
TRINITY_DN6460_c0_g1	4.71448	5.30845	1.72895e-07	1.08029e-05	1.303	3.057	2.4	13.955	133.78	29.899	penicillopepsin [Cordyceps militaris CM01]	0	gi|573977832|ref|XP_006666861.1|	Up
TRINITY_DN152_c0_g1	4.7059	0.631377	0.0175411	0.13197	0	0	0	14.787	3.455	10.624	.	.	.
TRINITY_DN9157_c0_g1	4.70549	1.80754	0.00586846	0.0617739	0	1.202	0	20.875	0	17.517	hypothetical protein CCM_06462 [Cordyceps militaris CM01]	3e-13	gi|573987491|ref|XP_006671666.1|	Up
TRINITY_DN6987_c0_g1	4.70527	0.630221	0.0144167	0.115677	0	0	0	18.916	8.85	9.049	.	.	.
TRINITY_DN6538_c0_g1	4.70526	0.630221	0.0144255	0.115677	0	0	0	26.553	12.483	12.713	.	.	.
TRINITY_DN4953_c0_g1	4.70451	0.632534	0.0329784	0.205838	0	0	0	15.265	0	14.618	hypothetical protein CCM_07853 [Cordyceps militaris CM01]	3e-79	gi|573990271|ref|XP_006673056.1|	Up
TRINITY_DN8988_c0_g1	4.70451	0.632534	0.0329959	0.20585	0	0	0	21.296	0	20.381	endothiapepsin precursor [Cordyceps militaris CM01]	4e-14	gi|573982581|ref|XP_006669211.1|	Up
TRINITY_DN2503_c0_g1	4.69917	2.79216	0.000241038	0.00506812	0.519	0	0.958	9.052	4.31	31.93	hypothetical protein CCM_09636 [Cordyceps militaris CM01]	0	gi|573993823|ref|XP_006674832.1|	Up
TRINITY_DN2638_c1_g1	4.68784	0.624804	0.0206188	0.148429	0	0	0	13.535	2.63	5.409	.	.	.
TRINITY_DN4594_c1_g1	4.68783	0.624804	0.0206269	0.148429	0	0	0	14.49	2.808	5.786	hypothetical protein CCM_03775 [Cordyceps militaris CM01]	5e-22	gi|573982131|ref|XP_006668986.1|	Up
TRINITY_DN11699_c0_g1	4.68782	0.624804	0.020635	0.148429	0	0	0	17.434	3.392	6.95	Protein kinase-like domain [Cordyceps militaris CM01]	3e-91	gi|573983333|ref|XP_006669587.1|	Up
TRINITY_DN6807_c0_g1	4.68448	0.625961	0.0347665	0.213175	0	0	0	25.884	0	15.486	F-box domain-containing protein [Cordyceps militaris CM01]	4e-37	gi|573989697|ref|XP_006672769.1|	Up
TRINITY_DN9287_c0_g1	4.68447	0.625961	0.0347853	0.213175	0	0	0	21.258	0	12.713	.	.	.
TRINITY_DN9272_c0_g1	4.68197	1.74125	0.00202851	0.0271392	1.322	0	0	13.477	3.131	30.698	carboxylesterase [Cordyceps militaris CM01]	1e-112	gi|573990745|ref|XP_006673293.1|	Up
TRINITY_DN5880_c3_g1	4.6739	0.622492	0.0343593	0.211416	0	0	0	13.305	7.744	0	.	.	.
TRINITY_DN1379_c1_g1	4.6719	2.86643	0.000140341	0.00321881	0	25.987	0	82.947	365.27	234.842	.	.	.
TRINITY_DN6200_c0_g1	4.67066	6.59801	1.00794e-11	1.50508e-09	8.527	13.066	13.265	144.493	151.878	588.947	hypothetical protein CCM_06307 [Cordyceps militaris CM01]	0	gi|573987181|ref|XP_006671511.1|	Up
TRINITY_DN5756_c0_g3	4.66988	4.36295	2.85609e-06	0.000120106	0.793	0	3.58	17.023	73.309	28.689	hypothetical protein BBA_09246 [Beauveria bassiana ARSEF 2860]	3e-12	gi|667661467|ref|XP_008602565.1|	Up
TRINITY_DN7312_c0_g1	4.66854	9.88209	4.63544e-13	8.78082e-11	88.454	82.076	70.379	690.912	3676.46	1682.54	hypothetical protein CCM_08377 [Cordyceps militaris CM01]	2e-67	gi|573991317|ref|XP_006673579.1|	Up
TRINITY_DN9680_c0_g1	4.66467	0.618232	0.0284311	0.184991	0	0	0	24.536	4.091	4.188	.	.	.
TRINITY_DN4845_c0_g1	4.66466	0.618232	0.0284507	0.185051	0	0	0	16.66	2.776	2.853	hypothetical protein MANI_016274 [Metarhizium anisopliae]	1e-11	gi|672381340|gb|KFG83525.1|	Up
TRINITY_DN2501_c0_g1	4.66465	0.618232	0.0284638	0.185063	0	0	0	17.75	2.954	3.036	.	.	.
TRINITY_DN4793_c4_g1	4.66464	0.618232	0.0284807	0.185063	0	0	0	21.086	3.517	3.606	.	.	.
TRINITY_DN9704_c0_g1	4.66462	0.618232	0.0285005	0.185063	0	0	0	20.703	3.455	3.538	hypothetical protein CCM_04482 [Cordyceps militaris CM01]	3e-15	gi|573983545|ref|XP_006669693.1|	Up
TRINITY_DN6027_c0_g2	4.66237	0.619388	0.0401981	0.232914	0	0	0	19.728	0	6.722	phosphatidylserine decarboxylase family protein [Cordyceps militaris CM01]	2e-57	gi|573992979|ref|XP_006674410.1|	Up
TRINITY_DN5960_c1_g1	4.65484	0.617076	0.0402625	0.233025	0	0	0	29.086	9.727	0	.	.	.
TRINITY_DN6004_c0_g2	4.64636	2.74861	0.000141875	0.00323814	0	0	0.387	7.771	1.555	2.1	hypothetical protein BBA_02872 [Beauveria bassiana ARSEF 2860]	1e-80	gi|667648719|ref|XP_008596191.1|	Up
TRINITY_DN6007_c3_g2	4.64342	4.1596	1.16441e-05	0.000411161	2.956	2.23	1.558	113.342	8.412	55.358	hypothetical protein CCM_09176 [Cordyceps militaris CM01]	1e-113	gi|573992905|ref|XP_006674373.1|	Up
TRINITY_DN1171_c0_g1	4.6416	1.71814	0.0215761	0.15315	0	0	0.803	28.551	1.033	0	hypothetical protein CCM_03771 [Cordyceps militaris CM01]	2e-24	gi|573982123|ref|XP_006668982.1|	Up
TRINITY_DN1410_c0_g1	4.64056	1.70298	0.000413675	0.00780401	0	0	1.113	11.116	12.9	17.768	.	.	.
TRINITY_DN4774_c2_g1	4.63659	0.612816	0.0521379	0.274394	0	0	0	32.25	0	4.827	.	.	.
TRINITY_DN4860_c1_g1	4.63587	1.69892	0.00408672	0.046684	2.077	0	0	6.395	7.442	58.702	.	.	.
TRINITY_DN5518_c3_g1	4.63489	1.69897	0.00345779	0.0409726	0.925	0	0	0.937	15.259	15.782	kinesin, putative [Cordyceps militaris CM01]	5e-171	gi|573984509|ref|XP_006670175.1|	Up
TRINITY_DN5683_c0_g2	4.63215	3.79532	5.68151e-05	0.00154966	0.737	0.836	0.939	1.835	41.925	18.738	glucose oxidase [Beauveria bassiana ARSEF 2860]	0	gi|667651025|ref|XP_008597344.1|	Up
TRINITY_DN6826_c0_g1	4.62088	0.584277	0.0575375	0.289	0	0	0	4.263	0	35.673	.	.	.
TRINITY_DN4200_c0_g1	4.61702	0.585093	0.0360089	0.216989	0	0	0	1.759	32.104	20.039	.	.	.
TRINITY_DN9168_c0_g1	4.61262	4.06815	2.5225e-05	0.00077845	0	5.259	0	30.109	52.049	51.102	Glycoside hydrolase [Cordyceps militaris CM01]	0	gi|573992797|ref|XP_006674319.1|	Up
TRINITY_DN3477_c2_g1	4.60513	1.69727	0.00126646	0.0189753	0.737	0	0	15.083	3.496	6.334	.	.	.
TRINITY_DN3724_c1_g1	4.6029	0.606244	0.0899471	0.367548	0	0	0	56.251	0	0	.	.	.
TRINITY_DN1673_c1_g1	4.60289	0.606244	0.0899846	0.367616	0	0	0	28.13	0	0	.	.	.
TRINITY_DN5799_c1_g2	4.60265	2.70227	0.0176004	0.132247	0	0	0.813	24.651	0.918	0	hypothetical protein CCM_03779 [Cordyceps militaris CM01]	7e-22	gi|573982139|ref|XP_006668990.1|	Up
TRINITY_DN4397_c1_g1	4.5986	2.78355	0.000114154	0.00272546	0.425	0.99	0	15.886	3.475	16.49	hypothetical protein CCM_07853 [Cordyceps militaris CM01]	0	gi|573990271|ref|XP_006673056.1|	Up
TRINITY_DN2716_c1_g1	4.59366	4.11269	1.04705e-07	6.90976e-06	1.851	1.298	0.339	18.486	31.864	35.296	aorsin endoprotease precursor [Cordyceps militaris CM01]	0	gi|573990333|ref|XP_006673087.1|	Up
TRINITY_DN8536_c0_g1	4.58787	1.67084	0.000692148	0.0117946	0	0	1.326	25.148	10.312	12.405	.	.	.
TRINITY_DN10741_c0_g1	4.58582	0.576359	0.0214175	0.152414	0	0	0	9.205	5.396	27.536	ferulic acid esterase (FaeA), putative [Cordyceps militaris CM01]	1e-37	gi|573985147|ref|XP_006670494.1|	Up
TRINITY_DN2703_c1_g1	4.57391	0.57281	0.0217479	0.153856	0	0	0	7.159	16.741	8.57	hypothetical protein BBAD15_g12054 [Beauveria bassiana D1-5]	5e-64	gi|701767041|gb|KGQ02726.1|	Up
TRINITY_DN8899_c0_g1	4.57291	0.571627	0.0300928	0.192687	0	0	0	3.871	11.251	2.317	cellulase, putative [Cordyceps militaris CM01]	2e-120	gi|573983683|ref|XP_006669762.1|	Up
TRINITY_DN6969_c0_g1	4.57259	0.570808	0.0478028	0.259623	0	0	0	9.157	0	18.27	hypothetical protein CCM_03435 [Cordyceps militaris CM01]	1e-11	gi|573981457|ref|XP_006668649.1|	Up
TRINITY_DN5443_c0_g1	4.57259	0.570808	0.0477788	0.259622	0	0	0	25.138	0	50.223	amidase family protein [Cordyceps militaris CM01]	1e-14	gi|573993303|ref|XP_006674572.1|	Up
TRINITY_DN6521_c0_g1	4.56423	0.568443	0.0184495	0.13691	0	0	0	24.603	19.402	29.476	hypothetical protein CCM_04597 [Cordyceps militaris CM01]	3e-40	gi|573983775|ref|XP_006669808.1|	Up
TRINITY_DN6801_c0_g1	4.55924	3.55122	4.69208e-06	0.000183313	3.097	2.413	0.948	22.089	74.426	61.806	hypothetical protein CCM_04301 [Cordyceps militaris CM01]	1e-95	gi|573983183|ref|XP_006669512.1|	Up
TRINITY_DN4844_c0_g1	4.55646	7.27124	2.56501e-08	2.00869e-06	14.278	3.298	5.97	305.33	31.144	228.314	RNA-binding protein [Cordyceps militaris CM01]	0	gi|573987627|ref|XP_006671734.1|	Up
TRINITY_DN4835_c1_g1	4.55172	0.562893	0.0234858	0.162348	0	0	0	12.273	3.58	11.012	hypothetical protein CCM_02298 [Cordyceps militaris CM01]	7e-26	gi|573979136|ref|XP_006667513.1|	Up
TRINITY_DN2486_c0_g1	4.55083	0.561711	0.019439	0.142181	0	0	0	9.281	5.406	5.558	hypothetical protein CCM_06522 [Cordyceps militaris CM01]	2e-11	gi|573987611|ref|XP_006671726.1|	Up
TRINITY_DN5278_c3_g1	4.5488	1.65143	0.00049976	0.00906876	1.256	0	0	16.631	11.877	12.268	NAD dependent epimerase/dehydratase, putative [Cordyceps militaris CM01]	2e-57	gi|573992901|ref|XP_006674371.1|	Up
TRINITY_DN1535_c0_g1	4.54652	0.560528	0.0230508	0.160346	0	0	0	18.925	16.647	5.66	.	.	.
TRINITY_DN4397_c2_g1	4.54126	3.86224	3.55931e-06	0.000144505	0.519	0.298	1.18	22.022	4.853	22.652	hypothetical protein CCM_07853 [Cordyceps militaris CM01]	0	gi|573990271|ref|XP_006673056.1|	Up
TRINITY_DN1894_c1_g1	4.5381	2.30996	0.000725077	0.0122374	0	2.125	0	18.505	4.29	29.956	.	.	.
TRINITY_DN1199_c0_g2	4.53703	3.3496	7.89689e-05	0.0020195	0	1.442	0.281	8.755	5.897	25.905	ABC multidrug transporter, putative [Cordyceps militaris CM01]	1e-159	gi|573990035|ref|XP_006672938.1|	Up
TRINITY_DN7791_c0_g1	4.53438	0.556162	0.0263417	0.174883	0	0	0	18.094	4.227	8.661	.	.	.
TRINITY_DN5503_c3_g1	4.53158	0.55498	0.0261723	0.174416	0	0	0	29.688	13.975	7.11	.	.	.
TRINITY_DN8303_c0_g1	4.53078	0.557344	0.0443076	0.248157	0	0	0	18.39	0	13.203	.	.	.
TRINITY_DN1557_c1_g1	4.52983	2.77635	0.00567986	0.0602742	0	2.067	0	20.98	0	28.769	hypothetical protein CCM_01573 [Cordyceps militaris CM01]	1e-155	gi|573977694|ref|XP_006666792.1|	Up
TRINITY_DN11400_c0_g1	4.52594	4.33088	3.53799e-07	2.01745e-05	1.879	2.75	0.861	18.151	73.006	35.536	cytochrome P450, putative [Cordyceps militaris CM01]	0	gi|573980218|ref|XP_006668054.1|	Up
TRINITY_DN1952_c0_g1	4.51963	0.553798	0.0439709	0.247047	0	0	0	14.433	9.017	0	exosome-associated family protein [Cordyceps militaris CM01]	6e-19	gi|573987405|ref|XP_006671623.1|	Up
TRINITY_DN10627_c0_g1	4.51527	1.60764	0.00153014	0.0220993	0	0	1.006	6.71	6.492	21.465	muramidase, putative [Cordyceps militaris CM01]	7e-81	gi|573987583|ref|XP_006671712.1|	Up
TRINITY_DN9039_c0_g1	4.5105	0.549432	0.0358841	0.216638	0	0	0	23.351	4.55	4.656	.	.	.
TRINITY_DN3519_c0_g1	4.51049	0.549432	0.0358942	0.216638	0	0	0	13.774	2.672	2.75	hypothetical protein BBA_04359 [Beauveria bassiana ARSEF 2860]	8e-53	gi|667651693|ref|XP_008597678.1|	Up
TRINITY_DN3463_c1_g1	4.51049	0.549432	0.0358945	0.216638	0	0	0	26.046	5.083	5.192	.	.	.
TRINITY_DN9776_c0_g1	4.50751	0.550613	0.0506126	0.269054	0	0	0	43.481	0	17.357	.	.	.
TRINITY_DN655_c0_g1	4.50751	0.550613	0.0506177	0.269054	0	0	0	32.613	0	13.009	.	.	.
TRINITY_DN7058_c0_g1	4.5075	0.550613	0.0506454	0.269054	0	0	0	29.602	0	11.811	.	.	.
TRINITY_DN2220_c0_g1	4.49696	4.00627	2.94982e-05	0.000899236	0.737	1.298	1.355	3.756	56.923	18.019	UV-damage endonuclease [Cordyceps militaris CM01]	0	gi|573981067|ref|XP_006668454.1|	Up
TRINITY_DN8462_c0_g1	4.49611	4.19775	2.0916e-05	0.000671295	0.774	2.721	0.716	7.494	68.904	18.453	hypothetical protein CCM_00853 [Cordyceps militaris CM01]	0	gi|573976260|ref|XP_006666075.1|	Up
TRINITY_DN3968_c0_g1	4.49329	1.63491	0.00152255	0.0220291	0	1.317	0	11.508	4.008	20.689	multidrug resistance protein, putative [Cordyceps militaris CM01]	7e-140	gi|573988393|ref|XP_006672117.1|	Up
TRINITY_DN11016_c0_g1	4.48375	1.58968	0.00207933	0.027672	0	0	0.939	8.373	19.423	3.766	P450 family sporulation-specific N-formyltyrosine oxidase Dit2 [Cordyceps militaris CM01]	2e-173	gi|573990423|ref|XP_006673132.1|	Up
TRINITY_DN712_c0_g1	4.48229	3.87156	4.61553e-05	0.00130121	7.318	16.027	5.544	55.39	547.415	118.237	.	.	.
TRINITY_DN593_c0_g1	4.48053	4.282	0.000205067	0.00442262	0	0	3.793	40.843	7.212	43.832	Protein kinase-like domain [Cordyceps militaris CM01]	0	gi|573983917|ref|XP_006669879.1|	Up
TRINITY_DN11814_c0_g1	4.4799	0.543884	0.0646859	0.309777	0	0	0	76.619	0	13.146	.	.	.
TRINITY_DN4592_c2_g1	4.4799	0.543884	0.0646897	0.309777	0	0	0	26.18	0	4.473	.	.	.
TRINITY_DN9619_c0_g1	4.47852	1.60447	0.00150887	0.0219179	1.322	0	0	21.564	4.697	14.539	.	.	.
TRINITY_DN5287_c1_g1	4.47555	0.542703	0.0647898	0.309907	0	0	0	28.054	4.686	0	.	.	.
TRINITY_DN2935_c1_g1	4.47555	0.542703	0.0648028	0.309907	0	0	0	20.436	3.402	0	Metalloprotease stcE [Beauveria bassiana D1-5]	8e-66	gi|701768202|gb|KGQ03577.1|	Up
TRINITY_DN11529_c0_g1	4.47554	0.542703	0.0648132	0.309907	0	0	0	37.182	6.241	0	hypothetical protein CCM_08084 [Cordyceps militaris CM01]	6e-20	gi|573990731|ref|XP_006673286.1|	Up
TRINITY_DN11472_c0_g1	4.46507	0.512804	0.116835	0.425427	0	0	0	0	0	46.605	putative RNA-dependent RNA polymerase [Cherry chlorotic rusty spot associated totiviral-like dsRNA 3]	3e-37	gi|104161952|emb|CAJ57273.1|	Up
TRINITY_DN4495_c2_g1	4.46507	0.512804	0.1168	0.425425	0	0	0	0	0	20.313	.	.	.
TRINITY_DN5907_c1_g1	4.45763	7.76117	2.15018e-16	7.87069e-14	2.899	5.269	6.202	69.89	117.676	124.627	histone-lysine N-methyltransferase (Ash1), putative [Cordyceps militaris CM01]	0	gi|573987553|ref|XP_006671697.1|	Up
TRINITY_DN6142_c0_g2	4.45593	7.24738	6.68858e-14	1.53055e-11	2.096	5.365	2.67	72.471	40.84	105.992	multidrug resistance-associated protein, putative [Cordyceps militaris CM01]	0	gi|573984225|ref|XP_006670033.1|	Up
TRINITY_DN5712_c0_g1	4.45002	6.40016	1.05355e-12	1.8751e-10	3.73	7.682	6.734	50.019	155.082	157.972	aldehyde dehydrogenase family protein [Cordyceps militaris CM01]	0	gi|573985473|ref|XP_006670657.1|	Up
TRINITY_DN3863_c0_g2	4.4427	0.537157	0.109802	0.411501	0	0	0	9.663	0	0	hypothetical protein CCM_00495 [Cordyceps militaris CM01]	3e-107	gi|573975546|ref|XP_006665718.1|	Up
TRINITY_DN10489_c0_g1	4.4427	0.537157	0.109814	0.411501	0	0	0	17.511	0	0	.	.	.
TRINITY_DN5595_c1_g2	4.4427	0.537157	0.109837	0.411501	0	0	0	48.69	0	0	.	.	.
TRINITY_DN8670_c0_g1	4.44269	0.537157	0.109857	0.411501	0	0	0	14.863	0	0	.	.	.
TRINITY_DN9050_c0_g1	4.44268	0.537157	0.109905	0.411501	0	0	0	21.105	0	0	.	.	.
TRINITY_DN6564_c0_g1	4.43448	2.59215	0.000343296	0.00666176	0	0.625	0.987	4.368	9.477	25.539	hypothetical protein CCM_08338 [Cordyceps militaris CM01]	0	gi|573991239|ref|XP_006673540.1|	Up
TRINITY_DN10775_c0_g1	4.43095	0.5059	0.0697517	0.323799	0	0	0	6.538	0	46.925	ankyrin repeat protein [Cordyceps militaris CM01]	1e-20	gi|573978698|ref|XP_006667294.1|	Up
TRINITY_DN2100_c0_g1	4.43094	0.5059	0.0697311	0.323799	0	0	0	4.827	0	34.669	MFS monosaccharide transporter, putative [Cordyceps militaris CM01]	5e-66	gi|573990525|ref|XP_006673183.1|	Up
TRINITY_DN4175_c0_g1	4.43094	0.5059	0.0697005	0.323786	0	0	0	7.178	0	51.558	.	.	.
TRINITY_DN8678_c0_g1	4.43093	0.5059	0.0696892	0.323786	0	0	0	8.669	0	62.331	.	.	.
TRINITY_DN2651_c1_g1	4.43093	0.5059	0.0696746	0.323786	0	0	0	12.416	0	89.65	ThiF family protein [Beauveria bassiana ARSEF 2860]	3e-27	gi|667650013|ref|XP_008596838.1|	Up
TRINITY_DN9848_c0_g1	4.43087	0.50796	0.0451288	0.250456	0	0	0	0	27.251	20.792	.	.	.
TRINITY_DN1448_c0_g1	4.43087	0.50796	0.0451203	0.250456	0	0	0	0	10.082	7.783	hypothetical protein CCM_07923 [Cordyceps militaris CM01]	1e-25	gi|573990411|ref|XP_006673126.1|	Up
TRINITY_DN203_c0_g2	4.43086	0.50796	0.0451029	0.250456	0	0	0	0	1.284	1.232	inosine-5'-monophosphate dehydrogenase IMD2 [Cordyceps militaris CM01]	0	gi|573985409|ref|XP_006670625.1|	Up
TRINITY_DN5578_c0_g1	4.42863	0.504329	0.114527	0.422552	0	0	0	0	7.066	0	hypothetical protein TRIVIDRAFT_170216, partial [Trichoderma virens Gv29-8]	2e-38	gi|358385063|gb|EHK22660.1|	Up
TRINITY_DN555_c1_g1	4.42804	0.505539	0.0665324	0.315121	0	0	0	0	41.226	6.984	catechol O-methyltransferase [Cordyceps militaris CM01]	8e-57	gi|573987795|ref|XP_006671818.1|	Up
TRINITY_DN7510_c0_g1	4.42255	4.74615	0.000200159	0.00432735	0.727	0.423	1.838	54.387	0.856	10.396	cation transport ATPase [Cordyceps militaris CM01]	0	gi|573991959|ref|XP_006673900.1|	Up
TRINITY_DN10556_c0_g1	4.41814	2.14356	0.00371899	0.0432818	0	0	0.987	20.761	1.263	4.588	hypothetical protein CCM_01967 [Cordyceps militaris CM01]	7e-39	gi|573978478|ref|XP_006667184.1|	Up
TRINITY_DN555_c0_g1	4.41784	0.50469	0.0379154	0.224335	0	0	0	2.294	2.672	13.74	.	.	.
TRINITY_DN2071_c0_g1	4.41784	0.50469	0.0379132	0.224335	0	0	0	3.661	4.279	21.888	hypothetical protein CCM_08387 [Cordyceps militaris CM01]	5e-17	gi|573991337|ref|XP_006673589.1|	Up
TRINITY_DN11665_c0_g1	4.41784	0.50469	0.0379129	0.224335	0	0	0	3.89	4.55	23.28	hypothetical protein CCM_04956 [Cordyceps militaris CM01]	2e-60	gi|573984487|ref|XP_006670164.1|	Up
TRINITY_DN8841_c0_g1	4.41784	0.50469	0.0379093	0.224335	0	0	0	2.667	3.11	15.976	.	.	.
TRINITY_DN7990_c0_g1	4.40884	0.503479	0.0271023	0.178788	0	0	0	2.772	6.46	13.272	.	.	.
TRINITY_DN5547_c3_g1	4.40883	0.503479	0.0270958	0.178788	0	0	0	3.345	7.817	16.011	.	.	.
TRINITY_DN99_c0_g1	4.40882	0.503479	0.0270823	0.178788	0	0	0	3.737	8.746	17.894	putative protein-arginine deiminase [Cordyceps militaris CM01]	3e-59	gi|573991507|ref|XP_006673674.1|	Up
TRINITY_DN4537_c4_g1	4.40327	0.498998	0.0712073	0.327676	0	0	0	11.221	0	33.55	.	.	.
TRINITY_DN7098_c0_g1	4.40326	0.498998	0.0711295	0.327489	0	0	0	16.574	0	49.675	.	.	.
TRINITY_DN4799_c4_g1	4.40326	0.498998	0.0711268	0.327489	0	0	0	9.73	0	29.1	hypothetical protein CCM_02496 [Cordyceps militaris CM01]	6e-62	gi|573979532|ref|XP_006667711.1|	Up
TRINITY_DN3259_c1_g1	4.40224	5.84945	1.61649e-12	2.7653e-10	3.362	3.932	5.254	43.481	140.23	82.153	deoxyribodipyrimidine photo-lyase Phr1, putative [Cordyceps militaris CM01]	0	gi|573974858|ref|XP_006665374.1|	Up
TRINITY_DN2841_c1_g1	4.40222	0.501059	0.0404996	0.233815	0	0	0	5.84	27.48	13.979	wd-repeat protein [Cordyceps militaris CM01]	2e-54	gi|573976178|ref|XP_006666034.1|	Up
TRINITY_DN1558_c1_g1	4.4004	5.05485	7.25168e-11	9.06203e-09	9.575	8.018	11.282	113.151	264.356	242.75	.	.	.
TRINITY_DN3929_c0_g1	4.3981	3.77253	1.31487e-05	0.000454276	1.162	4.076	4.257	143.069	29.067	35.125	hypothetical protein BBA_08825 [Beauveria bassiana ARSEF 2860]	1e-29	gi|667660625|ref|XP_008602144.1|	Up
TRINITY_DN6023_c0_g1	4.39486	3.88078	0.000495497	0.00900997	0	2.125	0	3.986	26.698	14.995	C6 zinc finger domain-containing protein [Cordyceps militaris CM01]	0	gi|573985931|ref|XP_006670886.1|	Up
TRINITY_DN1457_c1_g1	4.39373	0.497788	0.0400263	0.2323	0	0	0	17.329	10.259	41.55	.	.	.
TRINITY_DN11724_c0_g1	4.39373	0.497788	0.0400244	0.2323	0	0	0	8.258	4.832	19.765	.	.	.
TRINITY_DN10846_c0_g1	4.39373	0.497788	0.0400184	0.2323	0	0	0	10.16	5.959	24.307	.	.	.
TRINITY_DN2161_c0_g1	4.38803	0.496578	0.0302162	0.193112	0	0	0	10.619	12.483	18.487	.	.	.
TRINITY_DN6866_c0_g1	4.38803	0.496578	0.0302084	0.193112	0	0	0	5.592	6.523	10.031	.	.	.
TRINITY_DN4638_c0_g1	4.38605	3.56688	7.84977e-05	0.00201036	0.708	0.279	0.658	26.553	2.233	7.532	hypothetical protein BBA_07011 [Beauveria bassiana ARSEF 2860]	2e-60	gi|667656997|ref|XP_008600330.1|	Up
TRINITY_DN1279_c0_g4	4.37945	0.492098	0.0611559	0.299491	0	0	0	41.751	0	67.169	.	.	.
TRINITY_DN8979_c0_g1	4.37945	0.492098	0.061145	0.299491	0	0	0	14.29	0	22.801	.	.	.
TRINITY_DN5943_c0_g1	4.37945	0.492098	0.0611182	0.299491	0	0	0	9.807	0	16.912	.	.	.
TRINITY_DN4124_c1_g1	4.37659	0.490888	0.0338464	0.209034	0	0	0	12.091	4.717	14.47	.	.	.
TRINITY_DN1575_c0_g1	4.37493	0.489679	0.0283427	0.18468	0	0	0	5.572	4.321	4.451	.	.	.
TRINITY_DN1938_c0_g1	4.37146	0.48847	0.0332484	0.206936	0	0	0	10.352	12.096	4.131	.	.	.
TRINITY_DN9080_c0_g1	4.36254	5.1831	8.32862e-07	4.22911e-05	2.285	1.336	3.154	27.604	10.426	103.23	metallopeptidase MepB [Cordyceps militaris CM01]	0	gi|573989345|ref|XP_006672593.1|	Up
TRINITY_DN2789_c0_g1	4.36075	0.48399	0.0352233	0.214568	0	0	0	30.787	9.101	18.441	.	.	.
TRINITY_DN2972_c1_g1	4.36074	0.48399	0.0352352	0.214568	0	0	0	46.253	13.777	27.799	.	.	.
TRINITY_DN7738_c0_g1	4.36073	0.48399	0.035246	0.214568	0	0	0	9.377	2.734	5.615	serine peptidase, putative [Cordyceps militaris CM01]	9e-62	gi|573987633|ref|XP_006671737.1|	Up
TRINITY_DN2857_c0_g1	4.36073	0.48399	0.035247	0.214568	0	0	0	41.005	12.19	24.615	.	.	.
TRINITY_DN2614_c1_g1	4.36073	0.48399	0.0352539	0.214568	0	0	0	31.103	9.195	18.635	.	.	.
TRINITY_DN2520_c0_g1	4.36072	0.48399	0.0352761	0.214629	0	0	0	35.872	10.625	21.511	Protein kinase-like domain [Cordyceps militaris CM01]	3e-38	gi|573988487|ref|XP_006672164.1|	Up
TRINITY_DN2409_c1_g1	4.35813	0.482782	0.0350058	0.214013	0	0	0	32.106	18.985	9.62	.	.	.
TRINITY_DN10660_c0_g1	4.35812	0.482782	0.035017	0.214013	0	0	0	17.817	10.437	5.329	pantothenate transporter, putative [Cordyceps militaris CM01]	3e-49	gi|573991171|ref|XP_006673506.1|	Up
TRINITY_DN9662_c0_g1	4.35811	0.482782	0.0350293	0.214014	0	0	0	13.592	7.942	4.063	misfolded glycoproteins degradation protein Yos9, putative [Cordyceps militaris CM01]	3e-20	gi|573979302|ref|XP_006667596.1|	Up
TRINITY_DN4875_c0_g1	4.35749	0.485199	0.0584188	0.291594	0	0	0	10.638	0	9.552	hypothetical protein CCM_07853 [Cordyceps militaris CM01]	3e-87	gi|573990271|ref|XP_006673056.1|	Up
TRINITY_DN8675_c0_g1	4.35749	0.485199	0.0584354	0.291594	0	0	0	14.395	0	12.918	.	.	.
TRINITY_DN756_c1_g1	4.35749	0.485199	0.0584512	0.291594	0	0	0	22.978	0	20.621	.	.	.
TRINITY_DN1274_c0_g2	4.35748	0.485199	0.0585004	0.29165	0	0	0	12.674	0	11.606	NAD(P)-binding domain [Cordyceps militaris CM01]	1e-36	gi|573983875|ref|XP_006669858.1|	Up
TRINITY_DN5343_c1_g1	4.35748	0.485199	0.0585121	0.29165	0	0	0	33.521	0	30.138	.	.	.
TRINITY_DN8118_c0_g1	4.35558	4.49392	4.75972e-05	0.00133545	1.416	2.49	1.306	6.863	9.612	91.043	inorganic phosphate transporter PHO84 [Cordyceps militaris CM01]	0	gi|573976256|ref|XP_006666073.1|	Up
TRINITY_DN617_c0_g1	4.35532	1.50425	0.00465006	0.0511772	3.636	0	0	11.652	17.492	77.839	hypothetical protein CCM_00651 [Cordyceps militaris CM01]	1e-15	gi|573975856|ref|XP_006665873.1|	Up
TRINITY_DN5949_c1_g1	4.34591	0.481573	0.057716	0.289401	0	0	0	19.327	17.002	0	.	.	.
TRINITY_DN2207_c0_g1	4.34104	6.00082	0.0334782	0.207999	2.569	3.317	0	121.505	0	0	F-box and WD domain protein [Cordyceps militaris CM01]	0	gi|573991795|ref|XP_006673818.1|	Up
TRINITY_DN712_c0_g2	4.33828	6.85073	6.3551e-08	4.40854e-06	12.899	8.557	8.843	44.532	464.369	93.508	flavin-binding monooxygenase-like protein [Cordyceps militaris CM01]	0	gi|573990769|ref|XP_006673305.1|	Up
TRINITY_DN11590_c0_g1	4.33747	0.477095	0.0458649	0.252595	0	0	0	13.085	3.048	3.127	.	.	.
TRINITY_DN11574_c0_g1	4.33746	0.477095	0.0458855	0.252595	0	0	0	22.72	5.323	5.432	.	.	.
TRINITY_DN10710_c0_g1	4.33745	0.477095	0.0458921	0.252595	0	0	0	33.569	7.922	8.034	.	.	.
TRINITY_DN8135_c0_g1	4.33744	0.477095	0.0459128	0.252595	0	0	0	21.564	5.051	5.158	.	.	.
TRINITY_DN7861_c0_g1	4.33743	0.477095	0.0459255	0.252595	0	0	0	46.998	11.157	11.275	.	.	.
TRINITY_DN6926_c0_g1	4.33743	0.477095	0.0459321	0.252595	0	0	0	26.553	6.241	6.356	.	.	.
TRINITY_DN4817_c0_g2	4.33609	4.63362	0.000250302	0.00522258	0.907	2.192	0	3.441	7.619	50.794	hypothetical protein MYCTH_2308117 [Myceliophthora thermophila ATCC 42464]	0	gi|367031230|ref|XP_003664898.1|	Up
TRINITY_DN3826_c1_g1	4.33369	0.478303	0.0639102	0.307705	0	0	0	27.385	0	13.112	.	.	.
TRINITY_DN1843_c0_g1	4.33369	0.478303	0.0639139	0.307705	0	0	0	29.201	0	13.979	.	.	.
TRINITY_DN3925_c1_g1	4.33291	2.87125	0.00177431	0.0246946	1.7	3.99	1.558	36.532	2.025	116.708	hypothetical protein CCM_03644 [Cordyceps militaris CM01]	2e-48	gi|573981875|ref|XP_006668858.1|	Up
TRINITY_DN3882_c0_g2	4.33135	5.5082	1.09051e-08	9.41903e-07	1.501	1.759	4.112	38.816	17.597	90.974	protein kinase [Cordyceps militaris CM01]	0	gi|573979574|ref|XP_006667732.1|	Up
TRINITY_DN7696_c0_g1	4.32555	0.475886	0.0636414	0.307138	0	0	0	23.332	10.948	0	Peptidase M43B, pregnancy-associated plasma-A [Cordyceps militaris CM01]	2e-14	gi|573992559|ref|XP_006674200.1|	Up
TRINITY_DN3457_c0_g3	4.31979	3.10546	0.00526523	0.0567768	0.17	0.25	0.213	0.306	0.303	14.31	NACHT and TPR domain protein [Cordyceps militaris CM01]	0	gi|573990999|ref|XP_006673420.1|	Up
TRINITY_DN5878_c5_g1	4.31511	7.8373	1.93739e-09	2.00805e-07	12.097	15.335	12.994	561.273	67.986	169.396	CobW domain protein [Cordyceps militaris CM01]	0	gi|573990461|ref|XP_006673151.1|	Up
TRINITY_DN2604_c0_g1	4.30796	3.70005	4.41979e-06	0.000174221	0.869	1.009	0.532	22.624	6.805	19.4	ABC transporter, putative [Cordyceps militaris CM01]	0	gi|573978204|ref|XP_006667047.1|	Up
TRINITY_DN1396_c0_g1	4.30437	0.471409	0.079938	0.350543	0	0	0	20.923	0	4.177	.	.	.
TRINITY_DN7859_c0_g1	4.30437	0.471409	0.0799517	0.350543	0	0	0	27.623	0	5.512	hypothetical protein CCM_07853 [Cordyceps militaris CM01]	5e-19	gi|573990271|ref|XP_006673056.1|	Up
TRINITY_DN7132_c0_g1	4.30436	0.471409	0.0799705	0.350543	0	0	0	23.485	0	4.679	.	.	.
TRINITY_DN3449_c0_g1	4.30435	0.471409	0.0799987	0.350543	0	0	0	21.258	0	4.234	hypothetical protein CCM_09547 [Cordyceps militaris CM01]	2e-67	gi|573993645|ref|XP_006674743.1|	Up
TRINITY_DN7074_c0_g1	4.30434	0.471409	0.0800255	0.350543	0	0	0	17.511	0	3.492	RNA polymerase II accessory factor, Cdc73 [Cordyceps militaris CM01]	3e-19	gi|573976286|ref|XP_006666088.1|	Up
TRINITY_DN3139_c0_g1	4.30433	0.471409	0.0800743	0.350543	0	0	0	23.083	0	4.599	.	.	.
TRINITY_DN4651_c2_g1	4.30432	0.471409	0.0801039	0.350543	0	0	0	25.559	0	5.101	.	.	.
TRINITY_DN7729_c0_g1	4.30251	1.47801	0.00114195	0.0174966	1.218	0	0	9.979	10.134	13.454	hypothetical protein CCM_08120 [Cordyceps militaris CM01]	3e-22	gi|573990803|ref|XP_006673322.1|	Up
TRINITY_DN5880_c1_g1	4.29965	0.470201	0.0803625	0.350543	0	0	0	14.653	2.849	0	C6 transcription factor [Cordyceps militaris CM01]	8e-103	gi|573991699|ref|XP_006673770.1|	Up
TRINITY_DN3987_c0_g1	4.29963	0.470201	0.0804267	0.350543	0	0	0	14.337	2.922	0	.	.	.
TRINITY_DN5037_c1_g1	4.29734	2.04035	0.00346521	0.0410054	0.888	0	0.813	4.502	3.131	33.493	GLEYA adhesin domain [Cordyceps militaris CM01]	3e-166	gi|573981981|ref|XP_006668911.1|	Up
TRINITY_DN5942_c2_g1	4.29582	3.8358	6.90869e-05	0.00180878	3.494	3.067	1.606	11.566	31.979	120.576	hypothetical protein CCM_04607 [Cordyceps militaris CM01]	8e-142	gi|573983795|ref|XP_006669818.1|	Up
TRINITY_DN4774_c0_g1	4.29307	2.12759	0.00374554	0.0434186	0	2.961	0	28.359	1.492	32.455	hypothetical protein CCM_02206 [Cordyceps militaris CM01]	3e-14	gi|573978952|ref|XP_006667421.1|	Up
TRINITY_DN11663_c0_g1	4.29197	3.28948	4.56496e-05	0.00128902	2.276	0.885	1.393	10.81	62.611	21.294	.	.	.
TRINITY_DN4473_c1_g1	4.28931	1.53024	0.0160464	0.124829	0	0.913	0	19.881	0.918	0.959	hypothetical protein CCM_03764 [Cordyceps militaris CM01]	4e-96	gi|573982109|ref|XP_006668975.1|	Up
TRINITY_DN6940_c0_g1	4.2859	3.26854	2.51351e-05	0.000778349	6.506	0	2.98	34.945	102.49	63.803	hypothetical protein CCM_05323 [Cordyceps militaris CM01]	4e-54	gi|573985219|ref|XP_006670530.1|	Up
TRINITY_DN2399_c0_g1	4.27852	7.68132	3.30362e-07	1.90852e-05	4.835	5.653	5.341	70.913	10.99	222.426	ABC bile acid transporter, putative [Cordyceps militaris CM01]	0	gi|573980923|ref|XP_006668382.1|	Up
TRINITY_DN4175_c1_g1	4.2767	3.97847	0.00155896	0.022448	0.992	0.923	0.184	4.014	0.47	36.643	.	.	.
TRINITY_DN1717_c0_g1	4.27382	1.47111	0.00503243	0.0547355	1.105	0	0	21.439	3.924	4.063	.	.	.
TRINITY_DN6751_c0_g1	4.26272	0.464517	0.133989	0.461474	0	0	0	30.978	0	0	oxalate decarboxylase oxdC, putative [Cordyceps militaris CM01]	1e-60	gi|573992005|ref|XP_006673923.1|	Up
TRINITY_DN8895_c0_g1	4.26272	0.464517	0.133993	0.461474	0	0	0	27.088	0	0	.	.	.
TRINITY_DN10578_c0_g1	4.26272	0.464517	0.134011	0.461474	0	0	0	23.905	0	0	hypothetical protein CCM_04363 [Cordyceps militaris CM01]	1e-57	gi|573983307|ref|XP_006669574.1|	Up
TRINITY_DN7627_c0_g1	4.26272	0.464517	0.134016	0.461474	0	0	0	22.194	0	0	.	.	.
TRINITY_DN4465_c0_g2	4.26272	0.464517	0.134023	0.461474	0	0	0	5.534	0	0	C6 transcription factor [Cordyceps militaris CM01]	4e-82	gi|573984743|ref|XP_006670292.1|	Up
TRINITY_DN11559_c0_g1	4.26271	0.464517	0.134035	0.461474	0	0	0	64.26	0	0	.	.	.
TRINITY_DN11252_c0_g1	4.26271	0.464517	0.13405	0.461474	0	0	0	18.027	0	0	hypothetical protein BBAD15_g8932 [Beauveria bassiana D1-5]	2e-22	gi|701770911|gb|KGQ05798.1|	Up
TRINITY_DN8431_c0_g1	4.2627	0.464517	0.134095	0.461474	0	0	0	26.333	0	0	.	.	.
TRINITY_DN7988_c0_g1	4.26269	0.464517	0.134156	0.461504	0	0	0	16.66	0	0	hypothetical protein CCM_05965 [Cordyceps militaris CM01]	3e-22	gi|573986503|ref|XP_006671172.1|	Up
TRINITY_DN5518_c2_g1	4.25554	1.42179	0.00685118	0.0688688	0	0	1.442	1.615	18.713	21.226	kinesin, putative [Cordyceps militaris CM01]	5e-107	gi|573984509|ref|XP_006670175.1|	Up
TRINITY_DN11503_c0_g1	4.25106	0.430374	0.141565	0.470999	0	0	0	0	0	43.365	hypothetical protein CCM_02059 [Cordyceps militaris CM01]	6e-15	gi|573978662|ref|XP_006667276.1|	Up
TRINITY_DN6133_c0_g1	4.25105	0.430374	0.141483	0.470999	0	0	0	0	0	1.906	hypothetical protein CCM_07631 [Cordyceps militaris CM01]	0	gi|573989829|ref|XP_006672835.1|	Up
TRINITY_DN7736_c0_g1	4.25105	0.430374	0.141446	0.470999	0	0	0	0	0	28.598	.	.	.
TRINITY_DN3860_c3_g1	4.25104	0.430374	0.141422	0.470999	0	0	0	0	0	74.815	monooxygenase, putative [Cordyceps militaris CM01]	1e-34	gi|573978426|ref|XP_006667158.1|	Up
TRINITY_DN10519_c0_g1	4.25104	0.430374	0.141413	0.470999	0	0	0	0	0	54.753	cytochrome P450, putative [Cordyceps militaris CM01]	6e-20	gi|573978432|ref|XP_006667161.1|	Up
TRINITY_DN3793_c0_g1	4.24399	3.48219	0.00473793	0.0519492	7.375	3.461	0	112.998	0	99.293	.	.	.
TRINITY_DN8394_c0_g1	4.24169	2.47778	0.00164132	0.0233469	0	2.048	0.803	20.464	2.067	35.217	hypothetical protein CCM_08615 [Cordyceps militaris CM01]	7e-110	gi|573991789|ref|XP_006673815.1|	Up
TRINITY_DN10681_c0_g1	4.2346	0.429134	0.0832167	0.354261	0	0	0	0	13.589	68.527	.	.	.
TRINITY_DN4928_c0_g1	4.23459	0.429134	0.0832103	0.354261	0	0	0	0	6.648	33.824	.	.	.
TRINITY_DN4188_c1_g1	4.2271	1.41562	0.0128132	0.105925	0	0	1.374	19.862	0	18.304	hypothetical protein CCM_08481 [Cordyceps militaris CM01]	1e-97	gi|573991523|ref|XP_006673682.1|	Up
TRINITY_DN4431_c1_g1	4.21702	0.426656	0.0584269	0.291594	0	0	0	0	17.503	17.837	.	.	.
TRINITY_DN4881_c1_g1	4.21701	0.426656	0.0584103	0.291594	0	0	0	0	26.729	27.103	.	.	.
TRINITY_DN2949_c0_g1	4.21701	0.426656	0.0584004	0.291594	0	0	0	0	23.754	24.113	.	.	.
TRINITY_DN8057_c0_g1	4.21453	0.425417	0.0634104	0.306443	0	0	0	0	28.19	14.333	penicillin-binding protein, putative [Cordyceps militaris CM01]	8e-46	gi|573990677|ref|XP_006673259.1|	Up
TRINITY_DN9467_c0_g1	4.21441	0.424179	0.0812528	0.35162	0	0	0	0	32.448	6.607	.	.	.
TRINITY_DN11698_c0_g1	4.21441	0.424179	0.081233	0.35162	0	0	0	0	13.505	2.773	.	.	.
TRINITY_DN4474_c2_g1	4.21243	0.423294	0.114638	0.422743	0	0	0	2.619	0	15.657	hypothetical protein CCM_05519 [Cordyceps militaris CM01]	5e-30	gi|573985611|ref|XP_006670726.1|	Up
TRINITY_DN9902_c0_g1	4.21242	0.423294	0.11458	0.422628	0	0	0	10.801	0	64.864	.	.	.
TRINITY_DN6061_c2_g1	4.21155	1.46736	0.0099552	0.0897241	0	1.134	0	20.818	1.148	3.56	hypothetical protein CCM_00795 [Cordyceps militaris CM01]	1e-12	gi|573976144|ref|XP_006666017.1|	Up
TRINITY_DN7867_c0_g1	4.20666	3.86047	9.66728e-05	0.00238902	4.146	3.24	6.337	66.363	11.481	186.148	.	.	.
TRINITY_DN3331_c0_g1	4.19764	0.422055	0.070914	0.326924	0	0	0	6.194	7.295	29.659	ABC bile acid transporter, putative [Cordyceps militaris CM01]	2e-50	gi|573991717|ref|XP_006673779.1|	Up
TRINITY_DN328_c0_g1	4.19762	0.422055	0.0708695	0.32689	0	0	0	5.314	6.241	25.414	.	.	.
TRINITY_DN7267_c0_g4	4.19446	12.309	0.0016768	0.0236611	334.088	237.065	161.135	4249.73	3.329	8997.68	RNA-dependent RNA polymerase domain containing protein [Haemonchus contortus]	3e-48	gi|560138591|emb|CDJ82925.1|	Up
TRINITY_DN6775_c0_g1	4.18624	0.41834	0.0692727	0.32257	0	0	0	4.454	20.884	5.329	.	.	.
TRINITY_DN2388_c1_g1	4.18624	0.41834	0.0692524	0.32257	0	0	0	4.903	22.992	5.866	.	.	.
TRINITY_DN4634_c0_g1	4.18536	0.419578	0.0554451	0.283174	0	0	0	4.903	17.252	11.72	hypothetical protein CCM_00558 [Cordyceps militaris CM01]	2e-21	gi|573975672|ref|XP_006665781.1|	Up
TRINITY_DN8992_c0_g1	4.18535	0.419578	0.0554258	0.283174	0	0	0	5.009	17.628	11.982	.	.	.
TRINITY_DN9745_c0_g1	4.18534	0.419578	0.0554141	0.283174	0	0	0	5.525	19.465	13.215	.	.	.
TRINITY_DN2179_c1_g1	4.18534	0.419578	0.0554134	0.283174	0	0	0	3.527	12.357	8.433	.	.	.
TRINITY_DN10647_c0_g1	4.1828	0.416217	0.0913281	0.3704	0	0	0	11.776	0	28.187	.	.	.
TRINITY_DN11568_c0_g1	4.17458	0.414979	0.0542237	0.279936	0	0	0	14.787	8.725	26.555	.	.	.
TRINITY_DN11745_c0_g1	4.17457	0.414979	0.0542026	0.279936	0	0	0	22.491	13.401	40.546	hypothetical protein CCM_08288 [Cordyceps militaris CM01]	9e-12	gi|573991139|ref|XP_006673490.1|	Up
TRINITY_DN1725_c0_g1	4.17457	0.414979	0.0541872	0.279936	0	0	0	8.679	5.083	15.577	efflux pump antibiotic resistance protein, putative [Cordyceps militaris CM01]	2e-41	gi|573975174|ref|XP_006665532.1|	Up
TRINITY_DN8982_c0_g1	4.17457	0.414979	0.0541748	0.279936	0	0	0	7.608	4.446	13.648	C6 zinc finger domain protein [Cordyceps militaris CM01]	1e-16	gi|573985845|ref|XP_006670843.1|	Up
TRINITY_DN1768_c0_g1	4.17105	0.413741	0.0461728	0.253368	0	0	0	8.469	9.915	10.122	.	.	.
TRINITY_DN10719_c0_g1	4.17105	0.413741	0.0461632	0.253368	0	0	0	11.585	13.631	13.865	gamma-glutamyltranspeptidase [Cordyceps militaris CM01]	1e-13	gi|573978674|ref|XP_006667282.1|	Up
TRINITY_DN4701_c0_g1	4.16915	0.412504	0.053103	0.277543	0	0	0	23.447	41.935	14.093	.	.	.
TRINITY_DN9834_c0_g1	4.16502	0.411266	0.0896019	0.366931	0	0	0	10.237	24.026	0	hypothetical protein CCM_00567 [Cordyceps militaris CM01]	3e-17	gi|573975690|ref|XP_006665790.1|	Up
TRINITY_DN896_c0_g2	4.16502	0.411266	0.0896152	0.366931	0	0	0	2.036	5.688	0	hypothetical protein CCM_07105 [Cordyceps militaris CM01]	2e-71	gi|573988771|ref|XP_006672306.1|	Up
TRINITY_DN6121_c6_g1	4.16325	5.51573	2.18223e-10	2.60234e-08	7.913	5.961	5.718	156.135	47.373	147.907	hypothetical protein CCM_08803 [Cordyceps militaris CM01]	4e-137	gi|573992163|ref|XP_006674002.1|	Up
TRINITY_DN3124_c0_g1	4.16132	3.18174	5.15425e-06	0.000199162	1.303	0.51	0.793	19.442	17.899	12.188	hypothetical protein CCM_00558 [Cordyceps militaris CM01]	5e-19	gi|573975672|ref|XP_006665781.1|	Up
TRINITY_DN7711_c0_g1	4.15984	0.407906	0.0506488	0.269054	0	0	0	28.541	11.293	22.835	.	.	.
TRINITY_DN10721_c0_g1	4.15984	0.407906	0.0506573	0.269054	0	0	0	17.377	6.815	13.865	.	.	.
TRINITY_DN1208_c0_g1	4.15984	0.407906	0.0506618	0.269054	0	0	0	11.221	4.373	8.947	.	.	.
TRINITY_DN1780_c0_g1	4.15984	0.407906	0.050663	0.269054	0	0	0	16.689	6.544	13.317	.	.	.
TRINITY_DN538_c1_g1	4.15983	0.407906	0.0506761	0.269054	0	0	0	33.282	13.213	26.658	.	.	.
TRINITY_DN5486_c1_g1	4.15983	0.407906	0.0506819	0.269054	0	0	0	15.465	6.053	12.336	.	.	.
TRINITY_DN536_c1_g1	4.15983	0.407906	0.0506957	0.269054	0	0	0	15.58	6.095	12.427	.	.	.
TRINITY_DN10843_c0_g1	4.15982	0.407906	0.0507431	0.269077	0	0	0	20.139	7.922	16.079	hypothetical protein CCM_04836 [Cordyceps militaris CM01]	2e-13	gi|573984249|ref|XP_006670045.1|	Up
TRINITY_DN607_c1_g1	4.15981	0.407906	0.0507482	0.269077	0	0	0	26.591	10.51	21.26	efflux pump antibiotic resistance protein, putative [Cordyceps militaris CM01]	3e-15	gi|573975772|ref|XP_006665831.1|	Up
TRINITY_DN4014_c0_g1	4.15981	0.407906	0.0507592	0.269077	0	0	0	8.354	3.246	6.664	.	.	.
TRINITY_DN7858_c0_g1	4.15981	0.407906	0.0507715	0.269077	0	0	0	15.695	6.147	12.519	.	.	.
TRINITY_DN3937_c1_g1	4.15981	0.407906	0.0507764	0.269077	0	0	0	17.1	6.7	13.637	MFS transporter [Beauveria bassiana ARSEF 2860]	3e-13	gi|667650199|ref|XP_008596931.1|	Up
TRINITY_DN6865_c0_g1	4.15852	0.409143	0.0813184	0.35162	0	0	0	8.249	0	9.871	.	.	.
TRINITY_DN304_c1_g1	4.15852	0.409143	0.081333	0.35162	0	0	0	18.591	0	22.241	.	.	.
TRINITY_DN8702_c0_g1	4.15852	0.409143	0.0813414	0.35162	0	0	0	11.346	0	13.58	.	.	.
TRINITY_DN7158_c0_g1	4.15852	0.409143	0.0813525	0.35162	0	0	0	10.858	0	12.987	.	.	.
TRINITY_DN4257_c0_g1	4.15851	0.409143	0.0813626	0.35162	0	0	0	14.911	0	17.837	amidase, putative [Cordyceps militaris CM01]	3e-61	gi|573975150|ref|XP_006665520.1|	Up
TRINITY_DN11781_c0_g1	4.15851	0.409143	0.0813755	0.35162	0	0	0	20.713	0	24.798	hypothetical protein CCM_02408 [Cordyceps militaris CM01]	8e-18	gi|573979356|ref|XP_006667623.1|	Up
TRINITY_DN8931_c0_g1	4.15851	0.409143	0.08142	0.351623	0	0	0	16.306	0	19.514	Zinc finger domain-containing protein, PHD-finger [Cordyceps militaris CM01]	2e-25	gi|573979802|ref|XP_006667846.1|	Up
TRINITY_DN3893_c2_g1	4.15758	0.406669	0.0502328	0.268419	0	0	0	11.346	8.85	4.53	.	.	.
TRINITY_DN1160_c0_g1	4.15757	0.406669	0.0502456	0.268419	0	0	0	8.01	6.22	3.195	oryzin precursor [Cordyceps militaris CM01]	2e-47	gi|573975026|ref|XP_006665458.1|	Up
TRINITY_DN2992_c1_g1	4.15757	0.406669	0.0502562	0.268419	0	0	0	35.175	27.96	14.093	Pfs, NACHT and Ankyrin domain protein [Beauveria bassiana ARSEF 2860]	2e-18	gi|667657217|ref|XP_008600440.1|	Up
TRINITY_DN11465_c0_g1	4.15725	6.39501	9.73879e-17	3.81328e-14	9.962	12.825	9.617	165.454	205.659	202.159	hypothetical protein CCM_08437 [Cordyceps militaris CM01]	0	gi|573991437|ref|XP_006673639.1|	Up
TRINITY_DN4175_c2_g1	4.15638	1.97988	0.00631876	0.0645804	1.095	1.288	0	7.828	1.294	38.903	.	.	.
TRINITY_DN1078_c0_g1	4.15454	5.00818	7.98817e-10	8.79697e-08	3.721	4.355	6.299	85.709	43.751	107.692	hypothetical protein CCM_04834 [Cordyceps militaris CM01]	3e-20	gi|573984245|ref|XP_006670043.1|	Up
TRINITY_DN10030_c0_g1	4.15132	12.0958	3.10725e-05	0.000932704	300.933	220.01	144.087	3503.7	100.34	8071.51	putative replicase [Spinach latent virus]	4e-23	gi|20522135|ref|NP_620677.1|	Up
TRINITY_DN10768_c0_g1	4.1463	0.405432	0.0805581	0.35075	0	0	0	24.603	29.109	0	.	.	.
TRINITY_DN1185_c1_g1	4.13987	2.37498	0.000529508	0.00950096	1.237	1.442	1.132	42.812	7.306	24.147	.	.	.
TRINITY_DN2998_c0_g1	4.13909	0.400836	0.0615021	0.300643	0	0	0	15.303	4.477	4.576	hypothetical protein CCM_04561 [Cordyceps militaris CM01]	5e-53	gi|573983703|ref|XP_006669772.1|	Up
TRINITY_DN2911_c0_g1	4.13908	0.400836	0.0615187	0.300643	0	0	0	22.433	6.596	6.71	ankyrin repeat-containing domain [Cordyceps militaris CM01]	6e-40	gi|573987717|ref|XP_006671779.1|	Up
TRINITY_DN3515_c0_g1	4.13907	0.400836	0.0615298	0.300643	0	0	0	25.664	7.556	7.68	polyketide synthase, putative [Cordyceps militaris CM01]	2e-46	gi|573990599|ref|XP_006673220.1|	Up
TRINITY_DN2172_c0_g1	4.13907	0.400836	0.0615472	0.300643	0	0	0	14.395	4.206	4.302	.	.	.
TRINITY_DN5391_c0_g1	4.13906	0.400836	0.0615537	0.300643	0	0	0	35.49	10.51	10.624	.	.	.
TRINITY_DN1869_c1_g1	4.13905	0.400836	0.0615778	0.300643	0	0	0	23.953	7.045	7.167	zinc knuckle transcription factor (CnjB), putative [Cordyceps militaris CM01]	2e-21	gi|573992799|ref|XP_006674320.1|	Up
TRINITY_DN6717_c0_g1	4.13904	0.400836	0.0615963	0.300643	0	0	0	20.617	6.053	6.162	.	.	.
TRINITY_DN3062_c1_g1	4.13903	0.400836	0.0616064	0.300643	0	0	0	15.389	4.498	4.599	.	.	.
TRINITY_DN6430_c0_g4	4.13453	5.31687	3.31829e-12	5.46433e-10	1.265	2.115	2.158	30.156	27.867	39.291	glycosyl hydrolase, putative [Cordyceps militaris CM01]	0	gi|573991689|ref|XP_006673765.1|	Up
TRINITY_DN1988_c1_g1	4.1344	0.402072	0.0845029	0.356732	0	0	0	27.107	0	16.227	.	.	.
TRINITY_DN344_c0_g2	4.1344	0.402072	0.0845189	0.356732	0	0	0	11.833	0	5.957	.	.	.
TRINITY_DN3602_c0_g1	4.13439	0.402072	0.084553	0.356732	0	0	0	14.242	0	8.525	hypothetical protein BBAD15_g5133 [Beauveria bassiana D1-5]	9e-18	gi|701775465|gb|KGQ09523.1|	Up
TRINITY_DN7904_c0_g1	4.13438	0.402072	0.0845935	0.356732	0	0	0	18.792	0	11.241	.	.	.
TRINITY_DN7875_c0_g1	4.13438	0.402072	0.0845981	0.356732	0	0	0	16.125	0	9.643	.	.	.
TRINITY_DN11820_c0_g1	4.13438	0.402072	0.0846012	0.356732	0	0	0	9.482	0	5.672	.	.	.
TRINITY_DN2395_c0_g1	4.13437	0.402072	0.0846358	0.356766	0	0	0	19.059	0	11.4	.	.	.
TRINITY_DN9706_c0_g1	4.12601	0.399599	0.0842087	0.356365	0	0	0	17.473	10.239	0	.	.	.
TRINITY_DN8883_c0_g1	4.12601	0.399599	0.0842192	0.356365	0	0	0	20.923	12.284	0	.	.	.
TRINITY_DN1479_c0_g1	4.126	0.399599	0.0842501	0.356365	0	0	0	18.056	10.583	0	.	.	.
TRINITY_DN9870_c0_g1	4.12599	0.399599	0.0842802	0.356375	0	0	0	22.433	13.192	0	hypothetical protein CCM_00976 [Cordyceps militaris CM01]	5e-38	gi|573976504|ref|XP_006666197.1|	Up
TRINITY_DN1934_c0_g1	4.12546	1.93729	0.0105935	0.0937032	0	1.115	0.871	0	11.846	28.461	hypothetical protein CCM_07018 [Cordyceps militaris CM01]	4e-38	gi|573988597|ref|XP_006672219.1|	Up
TRINITY_DN9322_c0_g1	4.12305	1.35635	0.00810388	0.0773931	0	0	0.958	15.934	7.389	1.278	MFS monocarboxylate transporter [Cordyceps militaris CM01]	2e-147	gi|573985981|ref|XP_006670911.1|	Up
TRINITY_DN4683_c0_g2	4.12256	4.8458	0.000624796	0.0108569	3.05	0	0	13.334	31.822	8.057	pH response protein PalF [Cordyceps militaris CM01]	0	gi|573986391|ref|XP_006671116.1|	Up
TRINITY_DN3891_c0_g1	4.11384	4.40703	0.000351885	0.00679104	0	0	5.718	24.154	57.789	21.192	Hsp70 family chaperone [Cordyceps militaris CM01]	0	gi|573988381|ref|XP_006672111.1|	Up
TRINITY_DN8094_c1_g1	4.11043	1.32435	0.0223755	0.157074	0	0	1.761	1.969	41.132	2.351	.	.	.
TRINITY_DN9289_c0_g1	4.1064	8.67572	2.36641e-06	0.000102954	25.1	46.513	43.298	63.19	1505.65	385.522	Carbohydrate-binding WSC [Cordyceps militaris CM01]	0	gi|573977344|ref|XP_006666617.1|	Up
TRINITY_DN10596_c0_g1	4.10579	5.76402	1.06608e-06	5.18905e-05	3.985	10.008	10.479	120.215	20.853	280.066	hypothetical protein CCM_02025 [Cordyceps militaris CM01]	3e-37	gi|573978594|ref|XP_006667242.1|	Up
TRINITY_DN7092_c0_g1	4.10328	0.395004	0.103689	0.398338	0	0	0	39.705	0	9.517	hypothetical protein CCM_08288 [Cordyceps militaris CM01]	1e-15	gi|573991139|ref|XP_006673490.1|	Up
TRINITY_DN7895_c0_g1	4.10327	0.395004	0.103691	0.398338	0	0	0	38.482	0	9.221	.	.	.
TRINITY_DN3653_c1_g1	4.10327	0.395004	0.103696	0.398338	0	0	0	51.261	0	12.313	.	.	.
TRINITY_DN671_c2_g1	4.10327	0.395004	0.103701	0.398338	0	0	0	30.711	0	7.349	.	.	.
TRINITY_DN4797_c2_g1	4.10327	0.395004	0.103717	0.398338	0	0	0	17.53	0	4.188	MFS monocarboxylate transporter, putative [Cordyceps militaris CM01]	2e-54	gi|573977076|ref|XP_006666483.1|	Up
TRINITY_DN2771_c0_g1	4.10319	1.33912	0.00225305	0.0296039	0	0	0.948	9.501	9.79	5.067	protein kinase [Cordyceps militaris CM01]	4e-145	gi|573980559|ref|XP_006668202.1|	Up
TRINITY_DN8605_c0_g1	4.09843	0.393769	0.103654	0.398338	0	0	0	15.408	3.601	0	.	.	.
TRINITY_DN4594_c0_g1	4.09843	0.393769	0.103678	0.398338	0	0	0	15.934	3.716	0	hypothetical protein CCM_03775 [Cordyceps militaris CM01]	4e-20	gi|573982131|ref|XP_006668986.1|	Up
TRINITY_DN278_c1_g1	4.09841	0.393769	0.103712	0.398338	0	0	0	39.294	9.289	0	.	.	.
TRINITY_DN7812_c0_g1	4.0984	0.393769	0.103758	0.398338	0	0	0	18.094	4.227	0	chitotriosidase-1 [Colletotrichum higginsianum]	3e-65	gi|380492672|emb|CCF34432.1|	Up
TRINITY_DN7909_c0_g1	4.0984	0.393769	0.103762	0.398338	0	0	0	24.67	5.792	0	.	.	.
TRINITY_DN5685_c1_g1	4.0984	0.393769	0.103763	0.398338	0	0	0	16.565	3.872	0	.	.	.
TRINITY_DN1855_c0_g1	4.0984	0.393769	0.103763	0.398338	0	0	0	32.087	7.556	0	Protein kinase-like domain [Cordyceps militaris CM01]	5e-43	gi|573986397|ref|XP_006671119.1|	Up
TRINITY_DN8857_c0_g1	4.09839	0.393769	0.103793	0.398338	0	0	0	23.819	5.584	0	.	.	.
TRINITY_DN1471_c1_g1	4.09837	0.393769	0.103836	0.398338	0	0	0	20.283	4.749	0	.	.	.
TRINITY_DN4920_c2_g1	4.09837	0.393769	0.103842	0.398338	0	0	0	20.283	4.749	0	.	.	.
TRINITY_DN3053_c0_g1	4.09837	0.393769	0.103851	0.398338	0	0	0	19.919	4.665	0	.	.	.
TRINITY_DN3617_c1_g1	4.09836	0.393769	0.103864	0.398338	0	0	0	57.015	13.589	0	endothiapepsin precursor [Cordyceps militaris CM01]	1e-40	gi|573982581|ref|XP_006669211.1|	Up
TRINITY_DN11045_c0_g1	4.09067	11.94	1.25469e-05	0.000437775	412.352	309.844	196.809	6715.19	187.614	8579.73	.	.	.
TRINITY_DN3962_c0_g1	4.0821	1.31766	0.00550597	0.0588327	0	0	1.751	9.769	6.815	28.073	.	.	.
TRINITY_DN2479_c0_g1	4.07804	2.35273	0.00157466	0.0226125	0	1.529	0.6	23.294	2.317	12.77	.	.	.
TRINITY_DN9133_c0_g1	4.07781	1.90831	0.0010195	0.0160538	0	1.375	1.074	9.597	11.126	27.308	hypothetical protein CCM_06507 [Cordyceps militaris CM01]	1e-24	gi|573987581|ref|XP_006671711.1|	Up
TRINITY_DN3304_c0_g1	4.06605	5.52275	0.0232134	0.161159	0	0	11.204	0	96.52	92.583	alcohol dehydrogenase, putative [Cordyceps militaris CM01]	0	gi|573992001|ref|XP_006673921.1|	Up
TRINITY_DN5839_c0_g1	4.06592	8.15253	2.86948e-08	2.21756e-06	13.711	21.834	17.377	44.704	340.806	488.422	Cytochrome P450 [Cordyceps militaris CM01]	0	gi|573986543|ref|XP_006671192.1|	Up
TRINITY_DN1374_c0_g1	4.06326	4.26004	0.00348944	0.0412102	0	3.759	0	47.648	10.969	3.344	hypothetical protein BBA_02596 [Beauveria bassiana ARSEF 2860]	5e-166	gi|667648167|ref|XP_008595915.1|	Up
TRINITY_DN2901_c1_g1	4.06146	8.38645	5.74635e-07	3.0682e-05	11.615	19.497	15.645	26.553	508.538	234.979	sulfatase domain protein [Cordyceps militaris CM01]	0	gi|573993019|ref|XP_006674430.1|	Up
TRINITY_DN7068_c0_g1	4.0562	0.38794	0.169806	0.520452	0	0	0	57.092	0	0	.	.	.
TRINITY_DN8663_c0_g1	4.05619	0.38794	0.169821	0.520452	0	0	0	50.286	0	0	.	.	.
TRINITY_DN825_c0_g1	4.05619	0.38794	0.16984	0.520452	0	0	0	29.822	0	0	hypothetical protein CCM_04561 [Cordyceps militaris CM01]	6e-16	gi|573983703|ref|XP_006669772.1|	Up
TRINITY_DN10903_c1_g1	4.05619	0.38794	0.169842	0.520452	0	0	0	25.884	0	0	.	.	.
TRINITY_DN11384_c0_g1	4.05619	0.38794	0.169844	0.520452	0	0	0	25.721	0	0	.	.	.
TRINITY_DN1928_c0_g1	4.05619	0.38794	0.16986	0.520452	0	0	0	15.637	0	0	extracellular serine-rich protein [Cordyceps militaris CM01]	3e-22	gi|573975042|ref|XP_006665466.1|	Up
TRINITY_DN10672_c0_g1	4.05618	0.38794	0.169875	0.520452	0	0	0	24.335	0	0	.	.	.
TRINITY_DN4907_c0_g2	4.05618	0.38794	0.169876	0.520452	0	0	0	14.615	0	0	tyrosyl-DNA phosphodiesterase [Cordyceps militaris CM01]	4e-75	gi|573983229|ref|XP_006669535.1|	Up
TRINITY_DN7963_c0_g1	4.05618	0.38794	0.169899	0.520452	0	0	0	41.827	0	0	.	.	.
TRINITY_DN8892_c0_g1	4.05618	0.38794	0.169909	0.520452	0	0	0	34.2	0	0	.	.	.
TRINITY_DN1757_c1_g1	4.05618	0.38794	0.16991	0.520452	0	0	0	63.123	0	0	.	.	.
TRINITY_DN3742_c0_g1	4.05617	0.38794	0.169952	0.520452	0	0	0	5.477	0	0	DUF1479 domain protein [Cordyceps militaris CM01]	7e-67	gi|573975496|ref|XP_006665693.1|	Up
TRINITY_DN2382_c0_g1	4.05616	0.38794	0.17	0.520452	0	0	0	28.78	0	0	hypothetical protein CCM_09585 [Cordyceps militaris CM01]	4e-12	gi|573993721|ref|XP_006674781.1|	Up
TRINITY_DN2037_c1_g1	4.05615	0.38794	0.170056	0.520452	0	0	0	36.236	0	0	.	.	.
TRINITY_DN1074_c0_g1	4.05614	0.38794	0.170072	0.520452	0	0	0	41.043	0	0	.	.	.
TRINITY_DN11038_c0_g1	4.05614	0.38794	0.170077	0.520452	0	0	0	34.754	0	0	.	.	.
TRINITY_DN1004_c0_g1	4.04483	7.56464	1.49082e-08	1.24494e-06	21.011	17.69	19.67	94.608	691.288	167.136	copper radical oxidase [Cordyceps militaris CM01]	1e-144	gi|573978128|ref|XP_006667009.1|	Up
TRINITY_DN5087_c1_g1	4.04445	1.33287	0.0383626	0.226123	2.748	0	0	59.195	3.288	0	.	.	.
TRINITY_DN5362_c1_g1	4.04194	3.81836	8.70268e-05	0.00219059	2.937	0	2.254	56.432	10.98	22.162	.	.	.
TRINITY_DN2817_c1_g1	4.0393	1.35196	0.0123099	0.10383	0	1.682	0	26.324	1.701	5.261	.	.	.
TRINITY_DN1263_c0_g1	4.03908	3.76507	8.45585e-05	0.00214069	0.755	2.221	1.045	10.055	47.895	8.821	carboxypeptidase Y [Cordyceps militaris CM01]	0	gi|573987389|ref|XP_006671615.1|	Up
TRINITY_DN8625_c0_g1	4.0325	3.43129	5.18354e-05	0.00143113	1.237	0.961	1.142	5.037	32.083	19.651	acyl-protein thioesterase 1,2, putative [Cordyceps militaris CM01]	0	gi|573987513|ref|XP_006671677.1|	Up
TRINITY_DN1079_c0_g1	4.02827	2.56738	0.00010396	0.00252609	1.369	0	1.258	16.077	8.913	23.474	hypothetical protein CCM_01459 [Cordyceps militaris CM01]	8e-112	gi|573977466|ref|XP_006666678.1|	Up
TRINITY_DN1279_c0_g2	4.01053	13.0167	0.000100266	0.00246745	2152.43	1295.21	1145.46	14264.9	570.199	58366	.	.	.
TRINITY_DN6095_c1_g1	4.01034	1.91232	0.00303596	0.0375658	0	2.625	0	28.608	5.312	10.978	hypothetical protein CCM_04839 [Cordyceps militaris CM01]	8e-69	gi|573984255|ref|XP_006670048.1|	Up
TRINITY_DN6109_c7_g1	4.0079	1.28067	0.0053556	0.0576103	1.728	0	0	5.305	10.27	23.291	.	.	.
TRINITY_DN1462_c0_g1	4.00019	0.343246	0.176942	0.527889	0	0	0	0	0	55.05	cytochrome P450, putative [Cordyceps militaris CM01]	9e-49	gi|573978432|ref|XP_006667161.1|	Up
TRINITY_DN4178_c0_g1	4.00018	0.343246	0.176903	0.527889	0	0	0	0	0	64.864	.	.	.
TRINITY_DN470_c0_g1	4.00018	0.343246	0.176863	0.527889	0	0	0	0	0	23.965	.	.	.
TRINITY_DN7637_c0_g1	4.00016	0.343246	0.176761	0.527889	0	0	0	0	0	87.414	MFS monosaccharide transporter, putative [Cordyceps militaris CM01]	2e-37	gi|573990525|ref|XP_006673183.1|	Up
TRINITY_DN9497_c0_g1	4.00016	0.343246	0.176734	0.527889	0	0	0	0	0	30.161	COPII coat assembly protein sec16 [Cordyceps militaris CM01]	5e-55	gi|573990167|ref|XP_006673004.1|	Up
TRINITY_DN4923_c3_g1	3.99891	1.27641	0.00587283	0.0617739	2.106	0	0	8.612	10.019	28.358	ABC multidrug transporter, putative [Cordyceps militaris CM01]	2e-94	gi|573979334|ref|XP_006667612.1|	Up
TRINITY_DN3567_c0_g2	3.99297	4.10271	6.10408e-05	0.00163954	4.901	0	1.287	19.489	55.869	25.186	hypothetical protein CCM_00214 [Cordyceps militaris CM01]	3e-50	gi|573974984|ref|XP_006665437.1|	Up
TRINITY_DN4511_c1_g1	3.99293	1.81793	0.00148065	0.0215969	0	0	1.751	11.661	16.908	6.995	wd-repeat protein [Cordyceps militaris CM01]	8e-161	gi|573976178|ref|XP_006666034.1|	Up
TRINITY_DN7703_c0_g1	3.9902	2.82604	0.000581056	0.0102076	1.162	2.73	2.138	5.945	42.739	52.699	.	.	.
TRINITY_DN1135_c0_g1	3.98891	3.54541	3.06624e-05	0.000928302	1.426	0.836	0.977	10.858	33.92	8.251	hypothetical protein CCM_06158 [Cordyceps militaris CM01]	1e-126	gi|573986883|ref|XP_006671362.1|	Up
TRINITY_DN6557_c0_g1	3.98862	1.83899	0.0249939	0.169317	3.702	0	3.367	129.333	8.903	0	.	.	.
TRINITY_DN3913_c0_g1	3.98664	1.87627	0.00137611	0.0203928	0	2.894	0	10.094	21.959	16.638	phosphoglycerate mutase [Cordyceps militaris CM01]	2e-130	gi|573984055|ref|XP_006669948.1|	Up
TRINITY_DN9996_c0_g1	3.97967	0.341978	0.103902	0.398338	0	0	0	0	10.259	41.55	.	.	.
TRINITY_DN10141_c1_g1	3.97967	0.341978	0.103894	0.398338	0	0	0	0	4.373	17.894	.	.	.
TRINITY_DN6977_c0_g1	3.97966	0.341978	0.103892	0.398338	0	0	0	0	10.76	43.524	.	.	.
TRINITY_DN11437_c0_g1	3.97966	0.341978	0.103889	0.398338	0	0	0	0	4.53	18.521	.	.	.
TRINITY_DN9716_c0_g1	3.97966	0.341978	0.10387	0.398338	0	0	0	0	10.03	40.626	enoyl-CoA hydratase/isomerase [Cordyceps militaris CM01]	6e-31	gi|573990575|ref|XP_006673208.1|	Up
TRINITY_DN5037_c0_g1	3.97965	0.341978	0.103833	0.398338	0	0	0	0	12.858	51.901	GLEYA adhesin domain [Cordyceps militaris CM01]	2e-14	gi|573981981|ref|XP_006668911.1|	Up
TRINITY_DN10183_c0_g1	3.97357	1.83418	0.00151467	0.0219658	0	2.355	1.838	22.558	11.929	41.755	.	.	.
TRINITY_DN2354_c1_g1	3.97187	1.7998	0.00751711	0.0734617	0	0	1.5	15.848	0.971	12.998	RhoGAP domain-containing protein [Beauveria bassiana ARSEF 2860]	4e-172	gi|667650369|ref|XP_008597016.1|	Up
TRINITY_DN11584_c0_g1	3.96714	0.340709	0.123619	0.438322	0	0	0	0	10.875	16.638	small oligopeptide transporter, OPT family [Cordyceps militaris CM01]	1e-39	gi|573990459|ref|XP_006673150.1|	Up
TRINITY_DN4491_c2_g1	3.96714	0.340709	0.123616	0.438322	0	0	0	0	12.973	19.811	Acyl-CoA oxidase [Cordyceps militaris CM01]	2e-49	gi|573975910|ref|XP_006665900.1|	Up
TRINITY_DN4233_c2_g1	3.96713	0.340709	0.123605	0.438322	0	0	0	0	12.973	19.811	flavin-containing amine oxidasedehydrogenase, putative [Cordyceps militaris CM01]	7e-62	gi|573986241|ref|XP_006671041.1|	Up
TRINITY_DN2550_c0_g26	3.9668	0.336905	0.222303	0.585585	0	0	0	0	2.307	0	GPI-anchored cell wall beta-1,3-endoglucanase EglC [Cordyceps militaris CM01]	0	gi|573982825|ref|XP_006669333.1|	Up
TRINITY_DN8964_c0_g1	3.96339	0.338173	0.14577	0.477498	0	0	0	0	41.059	10.385	.	.	.
TRINITY_DN8565_c0_g1	3.96339	0.338173	0.145732	0.477462	0	0	0	0	42.52	10.75	.	.	.
TRINITY_DN5927_c2_g1	3.96338	0.338173	0.145718	0.477462	0	0	0	0	37.166	9.415	.	.	.
TRINITY_DN706_c0_g1	3.96232	0.339441	0.122671	0.43657	0	0	0	0	45.86	30.8	.	.	.
TRINITY_DN3477_c1_g1	3.96026	2.22687	0.00244103	0.031533	0	0.683	1.064	20.063	8.203	2.123	.	.	.
TRINITY_DN3240_c0_g2	3.95992	2.55085	0.0449953	0.250456	0	0.99	0.784	0	29.703	0	FAD-binding, type 2 [Cordyceps militaris CM01]	0	gi|573986775|ref|XP_006671308.1|	Up
TRINITY_DN4531_c0_g1	3.9574	4.15033	0.000269588	0.00552985	1.388	1.625	6.512	112.702	6.544	40.306	hypothetical protein CCM_03388 [Cordyceps militaris CM01]	7e-50	gi|573981363|ref|XP_006668602.1|	Up
TRINITY_DN8840_c0_g1	3.95575	0.335983	0.150207	0.483672	0	0	0	9.291	0	44.574	.	.	.
TRINITY_DN934_c0_g1	3.95575	0.335983	0.150191	0.483672	0	0	0	7.618	0	36.506	RNase3 domain protein [Cordyceps militaris CM01]	1e-48	gi|573993067|ref|XP_006674454.1|	Up
TRINITY_DN6904_c0_g1	3.94779	3.24095	0.00196147	0.0265176	4.561	10.72	2.09	4.674	84.361	184.676	hypothetical protein BBA_03005 [Beauveria bassiana ARSEF 2860]	5e-31	gi|667648985|ref|XP_008596324.1|	Up
TRINITY_DN3203_c1_g1	3.94536	1.8033	0.00448214	0.0497012	1.416	0	1.297	37.612	8.402	5.204	.	.	.
TRINITY_DN5919_c2_g1	3.9403	1.27786	0.00773197	0.0748771	0	1.779	0	21.64	5.385	5.558	.	.	.
TRINITY_DN4382_c0_g1	3.93924	0.334715	0.0966481	0.382011	0	0	0	5.563	6.544	19.971	hypothetical protein Z520_01841 [Fonsecaea multimorphosa CBS 102226]	8e-12	gi|761340794|gb|KIY01703.1|	Up
TRINITY_DN10933_c0_g1	3.93659	2.26332	0.000889353	0.0144694	0	2.009	0	10.485	6.742	13.968	hypothetical protein CCM_08084 [Cordyceps militaris CM01]	2e-173	gi|573990731|ref|XP_006673286.1|	Up
TRINITY_DN10014_c0_g1	3.93595	6.95596	3.90786e-11	5.10047e-09	16.091	18.325	14	112.53	427.193	193.497	hypothetical protein CCM_08770 [Cordyceps militaris CM01]	3e-115	gi|573992097|ref|XP_006673969.1|	Up
TRINITY_DN8533_c0_g1	3.93422	0.330913	0.148308	0.480895	0	0	0	9.998	47.498	0	hypothetical protein TRIATDRAFT_30031 [Trichoderma atroviride IMI 206040]	5e-23	gi|358392837|gb|EHK42241.1|	Up
TRINITY_DN7854_c0_g1	3.93422	0.330913	0.14825	0.480796	0	0	0	10.256	48.74	0	.	.	.
TRINITY_DN1892_c1_g1	3.93251	0.33218	0.0950545	0.378736	0	0	0	11.891	42.551	14.299	Acyl transferase/acyl hydrolase/lysophospholipase [Penicillium italicum]	1e-36	gi|700492063|gb|KGO76199.1|	Up
TRINITY_DN4200_c1_g1	3.9325	0.33218	0.0950298	0.378736	0	0	0	7.694	27.292	9.221	.	.	.
TRINITY_DN4744_c1_g1	3.9319	0.333448	0.083358	0.354261	0	0	0	12.789	30.57	30.8	class I glutamine amidotransferase, putative [Cordyceps militaris CM01]	9e-26	gi|573992161|ref|XP_006674001.1|	Up
TRINITY_DN10867_c0_g1	3.9319	0.333448	0.0833549	0.354261	0	0	0	9.998	23.754	23.999	hypothetical protein CCM_08586 [Cordyceps militaris CM01]	1e-45	gi|573991731|ref|XP_006673786.1|	Up
TRINITY_DN9901_c0_g1	3.93189	0.333448	0.0833347	0.354261	0	0	0	6.71	15.833	16.079	PAS-like protein [Cordyceps militaris CM01]	2e-49	gi|573990941|ref|XP_006673391.1|	Up
TRINITY_DN2254_c0_g1	3.93189	0.333448	0.0833281	0.354261	0	0	0	3.527	8.235	8.433	hypothetical protein CCM_03360 [Cordyceps militaris CM01]	3e-35	gi|573981307|ref|XP_006668574.1|	Up
TRINITY_DN3035_c0_g1	3.93189	0.333448	0.083328	0.354261	0	0	0	6.194	14.591	14.835	3-hydroxybutyryl-CoA dehydratase [Beauveria bassiana D1-5]	1e-57	gi|701767877|gb|KGQ03325.1|	Up
TRINITY_DN3930_c2_g1	3.93189	0.333448	0.0833244	0.354261	0	0	0	4.397	10.301	10.522	Fungal transcriptional regulatory protein [Cordyceps militaris CM01]	2e-65	gi|573978164|ref|XP_006667027.1|	Up
TRINITY_DN3889_c0_g1	3.92913	7.22182	9.77681e-16	3.02224e-13	15.128	11.941	20.067	264.803	215.209	234.762	hypothetical protein CCM_02903 [Cordyceps militaris CM01]	5e-152	gi|573980368|ref|XP_006668118.1|	Up
TRINITY_DN2829_c0_g1	3.92495	0.328723	0.121938	0.435458	0	0	0	17.329	0	31.165	.	.	.
TRINITY_DN1794_c0_g1	3.92495	0.328723	0.12191	0.435458	0	0	0	11.04	0	19.811	.	.	.
TRINITY_DN7856_c0_g1	3.92495	0.328723	0.121907	0.435458	0	0	0	11.977	0	21.5	.	.	.
TRINITY_DN7848_c0_g1	3.92495	0.328723	0.121869	0.435458	0	0	0	3.527	0	8.296	.	.	.
TRINITY_DN8877_c0_g1	3.92495	0.328723	0.121868	0.435458	0	0	0	10.868	0	19.514	.	.	.
TRINITY_DN5547_c4_g1	3.92495	0.328723	0.121742	0.435458	0	0	0	7.694	0	13.808	.	.	.
TRINITY_DN4076_c3_g1	3.92494	0.328723	0.121615	0.435458	0	0	0	7.121	0	12.781	hypothetical protein CCM_00169 [Cordyceps militaris CM01]	8e-22	gi|573974894|ref|XP_006665392.1|	Up
TRINITY_DN1802_c0_g1	3.92494	0.328723	0.121488	0.435452	0	0	0	13.678	0	24.569	.	.	.
TRINITY_DN10459_c0_g1	3.92351	1.7628	0.00691129	0.0692488	0.954	0	0.871	2.915	4.884	26.772	.	.	.
TRINITY_DN8854_c0_g1	3.92093	0.327457	0.0796603	0.350331	0	0	0	12.837	7.556	15.36	Putative hydroxymethylpyrimidine/phosphomethylpyrimidine kinase 2 [Beauveria bassiana D1-5]	8e-19	gi|701778246|gb|KGQ11833.1|	Up
TRINITY_DN11652_c0_g1	3.92093	0.327457	0.079666	0.350331	0	0	0	8.736	5.114	10.453	.	.	.
TRINITY_DN3814_c2_g1	3.92093	0.327457	0.0796672	0.350331	0	0	0	6.528	3.809	7.817	Taurine catabolism dioxygenase TauD/TfdA [Cordyceps militaris CM01]	6e-24	gi|573992211|ref|XP_006674026.1|	Up
TRINITY_DN3988_c1_g1	3.92093	0.327457	0.0796694	0.350331	0	0	0	9.338	5.469	11.161	hypothetical protein CCM_01568 [Cordyceps militaris CM01]	2e-62	gi|573977684|ref|XP_006666787.1|	Up
TRINITY_DN11712_c0_g1	3.92093	0.327457	0.0796978	0.350368	0	0	0	10.619	6.241	12.713	.	.	.
TRINITY_DN231_c0_g1	3.92088	5.23858	0.0142481	0.114898	4.023	0	1.616	80.433	5.323	0	bZIP transcription factor (AP-1), putative [Cordyceps militaris CM01]	0	gi|573993307|ref|XP_006674574.1|	Up
TRINITY_DN3545_c0_g1	3.92065	1.26374	0.0209046	0.14967	0	1.567	0	10.896	0	17.951	Protein kinase-like domain [Cordyceps militaris CM01]	1e-132	gi|573975778|ref|XP_006665834.1|	Up
TRINITY_DN5503_c0_g1	3.9199	2.59932	0.00253629	0.0324778	0	1.942	0	18.065	8.809	2.362	.	.	.
TRINITY_DN10663_c0_g1	3.91911	0.32619	0.0786358	0.348951	0	0	0	17.931	21.26	10.75	.	.	.
TRINITY_DN3207_c0_g1	3.9191	0.32619	0.0786973	0.348951	0	0	0	11.871	13.975	7.11	.	.	.
TRINITY_DN7547_c1_g1	3.9191	0.32619	0.0787359	0.348951	0	0	0	12.177	14.34	7.292	hypothetical protein CCM_02570 [Cordyceps militaris CM01]	3e-37	gi|573979680|ref|XP_006667785.1|	Up
TRINITY_DN10923_c0_g1	3.9191	0.32619	0.0787363	0.348951	0	0	0	8.306	9.727	4.976	.	.	.
TRINITY_DN11517_c0_g1	3.9191	0.32619	0.0787391	0.348951	0	0	0	11.489	13.516	6.87	.	.	.
TRINITY_DN4258_c1_g1	3.9191	0.32619	0.0787471	0.348951	0	0	0	15.886	18.786	9.517	.	.	.
TRINITY_DN2287_c1_g1	3.9191	0.32619	0.0787566	0.348951	0	0	0	7.608	8.903	4.553	.	.	.
TRINITY_DN3707_c0_g3	3.91773	3.28265	0.00100619	0.0159292	0	2.029	0	10.266	4.926	16.262	uncharacterized protein FFUJ_05554 [Fusarium fujikuroi IMI 58289]	5e-156	gi|517318762|emb|CCT69652.1|	Up
TRINITY_DN2162_c1_g1	3.91687	1.2494	0.02159	0.15315	0	1.346	0	0	10.865	14.036	.	.	.
TRINITY_DN3576_c2_g1	3.91637	1.79415	0.00101466	0.0160059	0	8.932	6.821	85.547	128.697	65.218	.	.	.
TRINITY_DN8696_c0_g1	3.91187	0.324924	0.119126	0.430563	0	0	0	10.705	18.859	0	.	.	.
TRINITY_DN4302_c0_g1	3.9105	1.21249	0.0111902	0.0974168	0	0	1.625	12.684	2.108	21.705	hypothetical protein CCM_00526 [Cordyceps militaris CM01]	1e-86	gi|573975608|ref|XP_006665749.1|	Up
TRINITY_DN3768_c0_g1	3.90709	1.75413	0.0027578	0.0348333	0	0	2.109	15.255	5.448	19.685	hypothetical protein CCM_08884 [Cordyceps militaris CM01]	2e-100	gi|573992325|ref|XP_006674083.1|	Up
TRINITY_DN8909_c0_g1	3.90615	0.320203	0.0866015	0.359577	0	0	0	13.028	5.083	5.192	tyrosinase precursor [Cordyceps militaris CM01]	4e-65	gi|573992057|ref|XP_006673949.1|	Up
TRINITY_DN3097_c0_g1	3.90615	0.320203	0.0866096	0.359577	0	0	0	12.779	4.989	5.101	amidase, putative [Cordyceps militaris CM01]	2e-21	gi|573979776|ref|XP_006667833.1|	Up
TRINITY_DN4510_c1_g1	3.90614	0.320203	0.0866214	0.359577	0	0	0	15.695	6.147	6.254	chitosanase, putative [Cordyceps militaris CM01]	1e-19	gi|573983869|ref|XP_006669855.1|	Up
TRINITY_DN9482_c0_g1	3.90614	0.320203	0.0866322	0.359577	0	0	0	36.723	14.612	14.721	Tetratricopeptide-like helical [Cordyceps militaris CM01]	1e-13	gi|573976902|ref|XP_006666396.1|	Up
TRINITY_DN10781_c0_g1	3.90614	0.320203	0.0866357	0.359577	0	0	0	14.806	5.792	5.9	.	.	.
TRINITY_DN6125_c1_g1	3.90614	0.320203	0.0866386	0.359577	0	0	0	14.003	5.469	5.58	Six-hairpin glycosidase-like protein [Cordyceps militaris CM01]	1e-38	gi|573989757|ref|XP_006672799.1|	Up
TRINITY_DN3115_c0_g1	3.90613	0.320203	0.0866417	0.359577	0	0	0	26.295	10.385	10.51	.	.	.
TRINITY_DN11335_c0_g1	3.90613	0.320203	0.0866548	0.359577	0	0	0	17.1	6.7	6.824	.	.	.
TRINITY_DN10742_c0_g1	3.90613	0.320203	0.0866585	0.359577	0	0	0	21.736	8.558	8.673	.	.	.
TRINITY_DN4013_c0_g1	3.90612	0.320203	0.0866655	0.359577	0	0	0	21.736	8.558	8.673	hypothetical protein CCM_07117 [Cordyceps militaris CM01]	1e-51	gi|573988795|ref|XP_006672318.1|	Up
TRINITY_DN8763_c0_g1	3.90611	0.320203	0.0866886	0.359577	0	0	0	20.522	8.068	8.194	.	.	.
TRINITY_DN4191_c0_g1	3.9061	0.320203	0.086719	0.359577	0	0	0	14.806	5.792	5.9	Cyclin-like F-box [Cordyceps militaris CM01]	9e-45	gi|573993493|ref|XP_006674667.1|	Up
TRINITY_DN4503_c0_g1	3.90609	0.320203	0.0867326	0.359577	0	0	0	28.895	11.428	11.56	.	.	.
TRINITY_DN9042_c0_g1	3.90609	0.320203	0.0867386	0.359577	0	0	0	33.741	13.401	13.511	glutathione S-transferase, putative [Cordyceps militaris CM01]	1e-38	gi|573978672|ref|XP_006667281.1|	Up
TRINITY_DN7995_c0_g1	3.90609	0.320203	0.0867387	0.359577	0	0	0	17.817	6.982	7.11	.	.	.
TRINITY_DN10569_c0_g1	3.90609	0.320203	0.086748	0.359577	0	0	0	24.077	9.498	9.62	.	.	.
TRINITY_DN11740_c0_g1	3.90609	0.320203	0.0867516	0.359577	0	0	0	13.907	5.438	5.546	Hsp70 family protein [Cordyceps militaris CM01]	2e-57	gi|573977354|ref|XP_006666622.1|	Up
TRINITY_DN1119_c0_g1	3.90509	2.74578	0.00106621	0.0166401	2.937	1.144	0.9	6.003	54.522	19.195	tyrosinase precursor [Cordyceps militaris CM01]	1e-90	gi|573979934|ref|XP_006667912.1|	Up
TRINITY_DN5957_c0_g2	3.90087	0.321468	0.11572	0.423775	0.198	0	0	2.686	0	2.043	MFS transporter, putative [Cordyceps militaris CM01]	2e-40	gi|573975610|ref|XP_006665750.1|	Up
TRINITY_DN9671_c0_g1	3.90086	0.321468	0.115749	0.423775	0	0	0	8.641	0	6.893	hypothetical protein CCM_06026 [Cordyceps militaris CM01]	2e-11	gi|573986625|ref|XP_006671233.1|	Up
TRINITY_DN2016_c1_g1	3.90086	0.321468	0.115763	0.423775	0	0	0	22.395	0	17.882	hypothetical protein CCM_06976 [Cordyceps militaris CM01]	2e-49	gi|573988513|ref|XP_006672177.1|	Up
TRINITY_DN1600_c1_g1	3.90085	0.321468	0.115817	0.423775	0	0	0	16.058	0	12.804	.	.	.
TRINITY_DN10530_c0_g1	3.90085	0.321468	0.115827	0.423775	0	0	0	23.819	0	19.035	.	.	.
TRINITY_DN9768_c0_g1	3.90084	0.321468	0.115861	0.423775	0	0	0	14.194	0	11.32	.	.	.
TRINITY_DN4789_c0_g1	3.90083	0.321468	0.1159	0.423775	0	0	0	21.736	0	17.357	.	.	.
TRINITY_DN4856_c0_g1	3.90082	0.321468	0.115941	0.423775	0	0	0	13.276	0	10.59	pfs domain-containing protein [Cordyceps militaris CM01]	1e-18	gi|573981923|ref|XP_006668882.1|	Up
TRINITY_DN10804_c0_g1	3.90082	0.321468	0.115946	0.423775	0	0	0	10.858	0	8.661	.	.	.
TRINITY_DN8042_c0_g1	3.90082	0.321468	0.115959	0.423775	0	0	0	20.331	0	16.227	.	.	.
TRINITY_DN10129_c0_g1	3.90082	0.321468	0.115978	0.423775	0	0	0	20.713	0	16.536	.	.	.
TRINITY_DN2167_c0_g1	3.90082	0.321468	0.11598	0.423775	0	0	0	17.817	0	14.208	norsolorinic acid reductase [Cordyceps militaris CM01]	1e-60	gi|573988933|ref|XP_006672387.1|	Up
TRINITY_DN3023_c1_g1	3.90082	0.321468	0.115982	0.423775	0	0	0	11.288	0	9.004	.	.	.
TRINITY_DN7506_c0_g1	3.90081	0.321468	0.115997	0.423775	0	0	0	38.377	0	30.8	.	.	.
TRINITY_DN4547_c1_g1	3.89764	3.42893	0.00149082	0.0217272	0.453	0.538	2.941	48.948	10.249	2.796	chitinase 3 precursor, putative [Cordyceps militaris CM01]	0	gi|573981761|ref|XP_006668801.1|	Up
TRINITY_DN3762_c0_g1	3.89732	6.15572	3.0907e-05	0.000931496	0	7.23	7.102	44.924	30.538	136.952	FAD binding domain protein [Cordyceps militaris CM01]	0	gi|573985897|ref|XP_006670869.1|	Up
TRINITY_DN3163_c0_g2	3.89712	5.66193	6.65092e-12	1.04633e-09	7.8	4.826	4.238	63.362	117.457	67.42	hypothetical protein CCM_08135 [Cordyceps militaris CM01]	5e-117	gi|573990833|ref|XP_006673337.1|	Up
TRINITY_DN863_c0_g2	3.89471	1.21561	0.00853966	0.0804216	2.285	0	0	13.028	34.16	6.185	.	.	.
TRINITY_DN8319_c0_g1	3.89345	1.21448	0.0112122	0.0975114	2.559	0	0	18.39	3.058	31.451	.	.	.
TRINITY_DN7094_c0_g1	3.89264	0.318937	0.115263	0.423239	0	0	0	20.139	15.833	0	.	.	.
TRINITY_DN11674_c0_g1	3.89264	0.318937	0.115275	0.423239	0	0	0	10.189	7.942	0	.	.	.
TRINITY_DN6084_c4_g1	3.89263	0.318937	0.115297	0.423239	0	0	0	37.258	29.662	0	.	.	.
TRINITY_DN7163_c0_g1	3.89263	0.318937	0.115303	0.423239	0	0	0	11.68	9.111	0	polyketide synthase, putative [Cordyceps militaris CM01]	6e-70	gi|573992639|ref|XP_006674240.1|	Up
TRINITY_DN7097_c0_g1	3.89263	0.318937	0.115316	0.423239	0	0	0	20.331	15.979	0	.	.	.
TRINITY_DN3724_c2_g1	3.89263	0.318937	0.115322	0.423239	0	0	0	18.266	14.34	0	.	.	.
TRINITY_DN224_c1_g1	3.89263	0.318937	0.115324	0.423239	0	0	0	31.15	24.694	0	hypothetical protein CCM_04814 [Cordyceps militaris CM01]	3e-31	gi|573984205|ref|XP_006670023.1|	Up
TRINITY_DN2985_c0_g1	3.89262	0.318937	0.115353	0.423239	0	0	0	13.449	10.51	0	.	.	.
TRINITY_DN11752_c0_g1	3.89261	0.318937	0.115385	0.423239	0	0	0	23.332	18.39	0	pantothenate transporter, putative [Cordyceps militaris CM01]	1e-47	gi|573991171|ref|XP_006673506.1|	Up
TRINITY_DN5797_c1_g1	3.89099	1.21464	0.0192529	0.14129	0	0	1.297	23.198	1.68	3.469	fungal specific transcription factor domain protein [Cordyceps militaris CM01]	9e-27	gi|573993733|ref|XP_006674787.1|	Up
TRINITY_DN9336_c0_g1	3.88706	1.24009	0.00679575	0.0685018	0	2.288	0	23.934	6.961	9.552	ThiJ/PfpI [Cordyceps militaris CM01]	2e-58	gi|573981803|ref|XP_006668822.1|	Up
TRINITY_DN4923_c4_g1	3.86981	3.57896	6.31961e-06	0.00024102	0.699	1.221	1.596	17.683	11.46	23.759	ABC multidrug transporter, putative [Cordyceps militaris CM01]	0	gi|573979334|ref|XP_006667612.1|	Up
TRINITY_DN4366_c1_g1	3.86938	0.314218	0.136344	0.46574	0	0	0	15.045	0	4.496	.	.	.
TRINITY_DN320_c0_g1	3.86938	0.314218	0.136358	0.46574	0	0	0	22.261	0	6.653	.	.	.
TRINITY_DN5787_c3_g1	3.86938	0.314218	0.136362	0.46574	0	0	0	34.658	0	10.385	.	.	.
TRINITY_DN5042_c2_g1	3.86936	0.314218	0.136403	0.46574	0	0	0	17.587	0	5.261	Sporulation-specific protein 5 [Beauveria bassiana D1-5]	3e-52	gi|701767616|gb|KGQ03133.1|	Up
TRINITY_DN3375_c0_g1	3.86936	0.314218	0.136413	0.46574	0	0	0	17.042	0	5.101	.	.	.
TRINITY_DN2006_c1_g1	3.86935	0.314218	0.136453	0.465769	0	0	0	27.882	0	8.342	non-ribosomal peptide synthase, putative [Cordyceps militaris CM01]	1e-49	gi|573981097|ref|XP_006668469.1|	Up
TRINITY_DN4784_c1_g1	3.86866	2.1916	0.0035133	0.0414631	0	1.952	0.764	25.444	14.747	2.031	MFS monocarboxylate transporter [Cordyceps militaris CM01]	7e-178	gi|573985981|ref|XP_006670911.1|	Up
TRINITY_DN7057_c0_g1	3.86417	0.312953	0.137009	0.465854	0	0	0	25.664	7.556	0	.	.	.
TRINITY_DN5301_c1_g1	3.86417	0.312953	0.137023	0.465854	0	0	0	12.273	3.58	0	hypothetical protein CCM_02291 [Cordyceps militaris CM01]	6e-64	gi|573979122|ref|XP_006667506.1|	Up
TRINITY_DN3703_c1_g1	3.86415	0.312953	0.137073	0.465854	0	0	0	17.253	5.051	0	.	.	.
TRINITY_DN6670_c0_g1	3.86415	0.312953	0.137087	0.465854	0	0	0	21.908	6.44	0	oryzin precursor [Cordyceps militaris CM01]	1e-53	gi|573975026|ref|XP_006665458.1|	Up
TRINITY_DN8035_c0_g1	3.86414	0.312953	0.137101	0.465854	0	0	0	17.702	5.187	0	.	.	.
TRINITY_DN11830_c0_g1	3.86414	0.312953	0.137103	0.465854	0	0	0	21.086	6.189	0	.	.	.
TRINITY_DN1784_c1_g1	3.86414	0.312953	0.13711	0.465854	0	0	0	25.903	7.629	0	.	.	.
TRINITY_DN9866_c0_g1	3.86414	0.312953	0.137111	0.465854	0	0	0	35.872	10.625	0	.	.	.
TRINITY_DN10838_c0_g1	3.86414	0.312953	0.137119	0.465854	0	0	0	22.261	6.544	0	.	.	.
TRINITY_DN4797_c4_g1	3.86413	0.312953	0.137139	0.465854	0	0	0	12.741	3.716	0	MFS monocarboxylate transporter, putative [Cordyceps militaris CM01]	2e-77	gi|573977076|ref|XP_006666483.1|	Up
TRINITY_DN10778_c0_g1	3.86412	0.312953	0.137165	0.465854	0	0	0	39.982	11.877	0	.	.	.
TRINITY_DN11531_c0_g1	3.86359	1.21473	0.0298968	0.191928	1.813	0	0	29.65	6.46	0	.	.	.
TRINITY_DN11433_c0_g1	3.85464	5.81005	6.51446e-07	3.42641e-05	10.501	13.931	12.22	304.699	25.633	198.564	hypothetical protein CCM_09418 [Cordyceps militaris CM01]	3e-69	gi|573993389|ref|XP_006674615.1|	Up
TRINITY_DN5391_c1_g1	3.85282	2.17525	0.00167869	0.0236628	1.246	2.913	0	17.769	7.368	38.035	.	.	.
TRINITY_DN8217_c0_g1	3.84965	7.13615	1.44676e-05	0.000491175	6.289	12.027	9.656	342.713	35.318	22.55	zinc finger protein OZF [Cordyceps militaris CM01]	0	gi|573982135|ref|XP_006668988.1|	Up
TRINITY_DN3882_c0_g1	3.84659	4.44601	9.99363e-08	6.64482e-06	0.755	2.865	1.858	25.635	28.576	26.589	protein kinase [Cordyceps militaris CM01]	0	gi|573979574|ref|XP_006667732.1|	Up
TRINITY_DN11619_c0_g1	3.84627	1.19227	0.00897352	0.0833492	1.69	0	0	19.031	4.018	10.362	.	.	.
TRINITY_DN5278_c2_g1	3.84521	1.7233	0.00164102	0.0233469	1.416	0	1.297	17.396	10.103	20.849	C6 finger domain protein, putative [Cordyceps militaris CM01]	2e-97	gi|573992903|ref|XP_006674372.1|	Up
TRINITY_DN8539_c1_g1	3.84347	4.57703	0.00012596	0.00295135	16.837	12.566	4.209	25.033	367.087	91.853	hypothetical protein BBA_00254 [Beauveria bassiana ARSEF 2860]	1e-55	gi|667643483|ref|XP_008593573.1|	Up
TRINITY_DN2017_c0_g1	3.84318	1.20706	0.049389	0.265396	1.898	0	0	34.945	0	2.328	hypothetical protein EPUS_06362 [Endocarpon pusillum Z07020]	3e-84	gi|629641454|ref|XP_007800225.1|	Up
TRINITY_DN9400_c0_g1	3.84041	1.20551	0.00421164	0.047631	0	1.625	0	12.713	6.554	8.456	hypothetical protein CCM_09491 [Cordyceps militaris CM01]	1e-47	gi|573993533|ref|XP_006674687.1|	Up
TRINITY_DN71_c1_g1	3.82867	3.04371	0.000659773	0.0113306	3.598	0	4.402	8.564	51.13	63.084	.	.	.
TRINITY_DN9373_c0_g1	3.82815	1.17358	0.00985912	0.0889947	4.325	0	0	22.271	10.437	53.281	.	.	.
TRINITY_DN2001_c1_g1	3.82634	3.28248	3.79005e-05	0.0011073	1.917	9.018	5.273	62.874	66.274	105.901	hypothetical protein CCM_00938 [Cordyceps militaris CM01]	1e-41	gi|573976428|ref|XP_006666159.1|	Up
TRINITY_DN5894_c0_g1	3.82483	2.68146	0.00108472	0.0168394	2.644	1.029	0.813	8.316	46.194	9.837	hypothetical protein CCM_07920 [Cordyceps militaris CM01]	2e-15	gi|573990405|ref|XP_006673123.1|	Up
TRINITY_DN1557_c0_g1	3.82158	1.69643	0.0158422	0.123622	1.53	0	1.403	17.167	0	33.665	hypothetical protein CCM_01573 [Cordyceps militaris CM01]	9e-58	gi|573977694|ref|XP_006666792.1|	Up
TRINITY_DN2983_c0_g2	3.81771	2.07362	0.00137062	0.0203628	0	0	1.471	7.064	12.639	3.07	SWR1-complex protein 5 [Cordyceps militaris CM01]	1e-155	gi|573977440|ref|XP_006666665.1|	Up
TRINITY_DN7145_c0_g1	3.81511	0.306972	0.218052	0.579604	0	0	0	65.933	0	0	.	.	.
TRINITY_DN10835_c0_g1	3.81511	0.306972	0.218073	0.579604	0	0	0	19.126	0	0	.	.	.
TRINITY_DN3068_c0_g1	3.81511	0.306972	0.218074	0.579604	0	0	0	46.444	0	0	.	.	.
TRINITY_DN7005_c0_g1	3.81511	0.306972	0.218076	0.579604	0	0	0	24.852	0	0	hypothetical protein CCM_06174 [Cordyceps militaris CM01]	8e-47	gi|573986915|ref|XP_006671378.1|	Up
TRINITY_DN3820_c0_g1	3.81509	0.306972	0.218186	0.579604	0	0	0	21.984	0	0	hypothetical protein BBA_02947 [Beauveria bassiana ARSEF 2860]	8e-18	gi|667648869|ref|XP_008596266.1|	Up
TRINITY_DN7769_c0_g1	3.81509	0.306972	0.218186	0.579604	0	0	0	23.494	0	0	.	.	.
TRINITY_DN340_c0_g1	3.81509	0.306972	0.218192	0.579604	0	0	0	42.372	0	0	.	.	.
TRINITY_DN5154_c0_g2	3.81508	0.306972	0.218195	0.579604	0	0	0	2.17	0	0	vesicular-fusion protein SEC18 [Cordyceps militaris CM01]	0	gi|573991599|ref|XP_006673720.1|	Up
TRINITY_DN9775_c0_g1	3.81508	0.306972	0.218204	0.579604	0	0	0	20.522	0	0	.	.	.
TRINITY_DN201_c1_g1	3.81508	0.306972	0.218223	0.579604	0	0	0	18.495	0	0	.	.	.
TRINITY_DN11510_c0_g1	3.81507	0.306972	0.218268	0.579635	0	0	0	29.44	0	0	.	.	.
TRINITY_DN5695_c0_g2	3.81506	0.306972	0.218332	0.579717	0	0	0	32.202	0	0	.	.	.
TRINITY_DN7944_c0_g1	3.81505	0.306972	0.218383	0.579766	0	0	0	31.523	0	0	.	.	.
TRINITY_DN3646_c0_g2	3.81468	5.03714	1.61267e-07	1.02213e-05	1.143	5.788	4.896	31.848	84.852	49.333	hypothetical protein FOYG_16790 [Fusarium oxysporum FOSC 3-a]	2e-11	gi|587658482|gb|EWY80873.1|	Up
TRINITY_DN10079_c0_g1	3.81187	5.79445	1.04586e-06	5.13316e-05	7.385	9.797	9.056	19.059	232.91	114.357	Methionine synthase, vitamin-B12 independent, putative [Cordyceps militaris CM01]	0	gi|573985217|ref|XP_006670529.1|	Up
TRINITY_DN5721_c1_g1	3.81149	1.16469	0.0256311	0.172296	1.246	0	0	8.88	0	15.212	.	.	.
TRINITY_DN5466_c0_g1	3.80911	5.06524	8.57141e-07	4.33989e-05	8.3	1.942	7.121	142.61	30.027	73.708	.	.	.
TRINITY_DN6114_c1_g1	3.80306	3.78346	0.00308571	0.0378363	7.016	7.249	4.122	133.482	0	111.995	.	.	.
TRINITY_DN3718_c0_g1	3.79191	2.60076	0.00193254	0.0262338	0.585	0	2.148	2.38	26.186	13.569	hypothetical protein CCM_01701 [Cordyceps militaris CM01]	0	gi|573977948|ref|XP_006666919.1|	Up
TRINITY_DN6029_c0_g1	3.78922	6.26863	0.000115958	0.00275869	4.835	4.624	7.073	211.85	12.128	9.472	benzoate 4-monooxygenase cytochrome P450, putative [Cordyceps militaris CM01]	0	gi|573983945|ref|XP_006669893.1|	Up
TRINITY_DN9586_c0_g1	3.78626	1.17276	0.00874686	0.0818914	0	2.807	0	14.701	5.709	26.407	argonaute siRNA chaperone complex subunit Arb1 [Beauveria bassiana ARSEF 2860]	7e-46	gi|667658285|ref|XP_008600974.1|	Up
TRINITY_DN321_c0_g1	3.7858	1.18709	0.0154616	0.121622	0	1.567	0	17.778	1.586	6.562	forkhead domain-containing protein [Cordyceps militaris CM01]	7e-137	gi|573974864|ref|XP_006665377.1|	Up
TRINITY_DN9567_c0_g1	3.78315	1.16752	0.0383494	0.226123	1.624	0	0	26.629	0	3.983	.	.	.
TRINITY_DN1203_c0_g1	3.7795	2.37082	0.000202119	0.00436439	1.454	0	1.335	17.042	16.313	9.78	hypothetical protein MAA_08556 [Metarhizium robertsii ARSEF 23]	5e-12	gi|629730786|ref|XP_007824745.1|	Up
TRINITY_DN3915_c0_g1	3.77846	1.14155	0.00983132	0.0888804	0	0	1.596	17.826	9.56	4.268	elastinolytic metalloproteinase Mep [Cordyceps militaris CM01]	4e-71	gi|573977652|ref|XP_006666771.1|	Up
TRINITY_DN10529_c0_g1	3.77191	3.84794	2.34514e-05	0.000733948	3.324	1.461	0.764	27.547	11.282	38.138	secreted serine protease [Cordyceps militaris CM01]	0	gi|573991127|ref|XP_006673484.1|	Up
TRINITY_DN4530_c1_g1	3.76598	1.16123	0.0536667	0.278928	1.228	0	0	21.363	1.461	0	.	.	.
TRINITY_DN2980_c0_g1	3.76579	2.10445	0.000985686	0.0156823	1.199	2.452	0	11.04	24.193	22.047	oxidoreductase, short chain dehydrogenase/reductase family, putative [Cordyceps militaris CM01]	2e-119	gi|573992751|ref|XP_006674296.1|	Up
TRINITY_DN3762_c2_g1	3.76447	1.6714	0.00484295	0.052936	24.429	0	0	100.831	60.221	242.67	.	.	.
TRINITY_DN4846_c0_g1	3.76421	2.56533	0.00309004	0.0378363	0	0	1.664	1.959	9.351	13.842	Peptidase M20D/carboxypeptidase Ss1 [Cordyceps militaris CM01]	0	gi|573991119|ref|XP_006673480.1|	Up
TRINITY_DN11499_c0_g1	3.76371	5.92158	2.38298e-07	1.45135e-05	16.724	14.979	27.091	515.795	62.841	222.597	.	.	.
TRINITY_DN3676_c0_g2	3.763	3.13304	0.000818341	0.0135774	0	0	2.593	12.722	15.113	9.609	.	.	.
TRINITY_DN8209_c0_g1	3.76178	1.13359	0.013447	0.109794	0	0	1.664	22.3	4.321	6.676	.	.	.
TRINITY_DN7761_c0_g1	3.75474	1.15555	0.0059616	0.0621926	0	1.711	0	13.439	5.198	8.947	glutamyl-tRNA(Gln) amidotransferase [Cordyceps militaris CM01]	1e-115	gi|573975300|ref|XP_006665595.1|	Up
TRINITY_DN1123_c0_g1	3.74929	5.44634	6.15732e-06	0.000236366	1.001	6.441	3.454	88.902	11.783	44.631	C6 zinc finger domain-containing protein [Cordyceps militaris CM01]	0	gi|573991091|ref|XP_006673466.1|	Up
TRINITY_DN5763_c0_g1	3.74699	2.61709	0.000696045	0.0118267	5.213	2.057	1.364	14.701	68.132	45.635	Fungal transcriptional regulatory protein [Cordyceps militaris CM01]	5e-36	gi|573985685|ref|XP_006670763.1|	Up
TRINITY_DN362_c0_g1	3.74572	1.11466	0.0151083	0.11943	0	0	2.012	13.496	2.62	24.227	Uncharacterised domain, di-copper centre [Penicillium roqueforti FM164]	4e-29	gi|584416491|emb|CDM28194.1|	Up
TRINITY_DN3961_c1_g1	3.7448	6.67118	8.92486e-14	1.99058e-11	15.402	11.383	14.91	211.745	128.029	216.423	DUF1115 domain protein [Cordyceps militaris CM01]	0	gi|573987425|ref|XP_006671633.1|	Up
TRINITY_DN2481_c0_g1	3.72973	5.29775	3.84381e-08	2.85772e-06	3.135	3.057	4.083	39.629	18.766	78.193	hypothetical protein CCM_00639 [Cordyceps militaris CM01]	0	gi|573975834|ref|XP_006665862.1|	Up
TRINITY_DN2908_c0_g2	3.72459	2.75993	0.00282307	0.035442	0	0	2.651	26.094	5.678	7.246	.	.	.
TRINITY_DN10918_c0_g1	3.72161	7.23758	6.40775e-15	1.71068e-12	20.312	23.324	17.251	280.116	295.187	219.139	hypothetical protein CCM_04656 [Cordyceps militaris CM01]	2e-120	gi|573983891|ref|XP_006669866.1|	Up
TRINITY_DN263_c1_g7	3.72093	1.10618	0.00566381	0.0601545	0	0	2.806	22.089	14.737	18.875	.	.	.
TRINITY_DN7399_c0_g1	3.72032	7.65404	1.2531e-06	5.93539e-05	17.29	17.623	23.095	57.637	586.971	111.07	replication factor C subunit 5 [Cordyceps militaris CM01]	0	gi|573976272|ref|XP_006666081.1|	Up
TRINITY_DN3766_c0_g1	3.71432	2.0336	0.00129161	0.0192703	0	0.625	0.987	11.432	5.041	7.189	high affinity methionine permease [Cordyceps militaris CM01]	0	gi|573974982|ref|XP_006665436.1|	Up
TRINITY_DN4397_c0_g1	3.70793	2.02409	0.00755727	0.0737315	0	0.981	1.529	14.452	0.981	21.42	hypothetical protein CCM_07853 [Cordyceps militaris CM01]	0	gi|573990271|ref|XP_006673056.1|	Up
TRINITY_DN4189_c1_g1	3.70344	1.10833	0.0914528	0.370479	0	0	1.238	23.399	0	0	oxalate decarboxylase oxdC, putative [Cordyceps militaris CM01]	6e-76	gi|573992005|ref|XP_006673923.1|	Up
TRINITY_DN2922_c0_g1	3.70149	2.42256	0.00420416	0.0475771	0	2.221	0	15.083	10.907	2.02	.	.	.
TRINITY_DN3849_c0_g1	3.70132	4.01842	7.69e-05	0.00197231	0	2.778	1.335	27.289	14.601	13.021	protein required for cell viability, putative [Cordyceps militaris CM01]	1e-64	gi|573974944|ref|XP_006665417.1|	Up
TRINITY_DN6572_c0_g1	3.69635	4.48172	8.7652e-06	0.000322428	3.532	3.096	3.251	17.53	87.409	23.725	Major facilitator superfamily transporter [Cordyceps militaris CM01]	0	gi|573989271|ref|XP_006672556.1|	Up
TRINITY_DN6008_c4_g2	3.69617	0.250863	0.293706	0.66233	0	0	0	0	0	3.8	hypothetical protein CCM_01040 [Cordyceps militaris CM01]	9e-67	gi|573976632|ref|XP_006666261.1|	Up
TRINITY_DN5827_c0_g2	3.69616	0.250863	0.293665	0.66233	0	0	0	0	0	9.746	involucrin repeat protein [Cordyceps militaris CM01]	3e-28	gi|573986449|ref|XP_006671145.1|	Up
TRINITY_DN1835_c0_g1	3.69616	0.250863	0.293626	0.66233	0	0	0	0	0	21.739	hypothetical protein [Amasya cherry disease-associated mycovirus]	4e-14	gi|99644805|emb|CAJ29960.1|	Up
TRINITY_DN6125_c0_g2	3.69616	0.250863	0.293624	0.66233	0	0	0	0	0	58.314	Six-hairpin glycosidase-like protein [Cordyceps militaris CM01]	2e-26	gi|573989757|ref|XP_006672799.1|	Up
TRINITY_DN4923_c1_g1	3.69087	2.01006	0.00197453	0.0266139	0	1.077	1.684	11.212	6.502	22.413	ABC multidrug transporter, putative [Cordyceps militaris CM01]	5e-175	gi|573979334|ref|XP_006667612.1|	Up
TRINITY_DN4071_c0_g2	3.6883	2.93009	0.00045916	0.00849831	1.058	0	1.297	3.957	14.372	14.881	hypothetical protein CCM_04052 [Cordyceps militaris CM01]	1e-56	gi|573982685|ref|XP_006669263.1|	Up
TRINITY_DN9432_c0_g1	3.68732	2.0226	0.00859158	0.0808242	0	0.692	1.084	19.795	1.388	4.314	.	.	.
TRINITY_DN5689_c0_g1	3.68524	5.02261	1.50344e-07	9.63298e-06	8.017	10.095	4.286	41.693	102.636	140.764	hypothetical protein CCM_05200 [Cordyceps militaris CM01]	4e-156	gi|573984975|ref|XP_006670408.1|	Up
TRINITY_DN2662_c0_g1	3.68138	3.03216	0.0646073	0.309765	0	0	3.212	0.621	43.282	0	tyrosinase precursor [Cordyceps militaris CM01]	0	gi|573979934|ref|XP_006667912.1|	Up
TRINITY_DN5466_c1_g1	3.67836	7.21481	1.60636e-09	1.68477e-07	20.539	5.49	19.98	292.159	112.332	182.108	ATPase family AAA domain-containing protein 1-A [Beauveria bassiana D1-5]	0	gi|701767473|gb|KGQ03013.1|	Up
TRINITY_DN6138_c0_g1	3.67345	3.46447	0.000162436	0.00360924	2.096	2.202	0	24.364	10.061	19.719	inositol-pentakisphosphate 2-kinase [Cordyceps militaris CM01]	0	gi|573977416|ref|XP_006666653.1|	Up
TRINITY_DN4133_c0_g1	3.67134	5.91314	2.40612e-06	0.000104167	8.65	7.595	11.136	14.978	189.231	143.274	Ig domain protein group 2 domain protein [Cordyceps militaris CM01]	0	gi|573990519|ref|XP_006673180.1|	Up
TRINITY_DN9023_c0_g1	3.67027	0.249564	0.204275	0.559248	0	0	0	0	17.377	52.448	.	.	.
TRINITY_DN5899_c1_g1	3.67026	0.249564	0.204238	0.559236	0	0	0	0	15.77	47.633	.	.	.
TRINITY_DN4583_c0_g2	3.67026	0.249564	0.204237	0.559236	0	0	0	0	0.95	3.754	florfenicol exporter, putative [Cordyceps militaris CM01]	1e-154	gi|573985703|ref|XP_006670772.1|	Up
TRINITY_DN4040_c2_g1	3.67025	0.249564	0.204213	0.559236	0	0	0	0	18.619	56.123	.	.	.
TRINITY_DN11738_c0_g1	3.67025	0.249564	0.204201	0.559236	0	0	0	0	8.725	26.555	metallopeptidase MepB [Cordyceps militaris CM01]	9e-48	gi|573991715|ref|XP_006673778.1|	Up
TRINITY_DN4147_c1_g1	3.67025	0.249564	0.204197	0.559236	0	0	0	0	13.213	39.987	ankyrin repeat-containing domain [Cordyceps militaris CM01]	9e-34	gi|573991965|ref|XP_006673903.1|	Up
TRINITY_DN9648_c0_g1	3.67025	0.249564	0.204192	0.559236	0	0	0	0	8.141	24.798	hypothetical protein EURHEDRAFT_407714 [Aspergillus ruber CBS 135680]	6e-14	gi|599160769|gb|EYE99719.1|	Up
TRINITY_DN3785_c0_g1	3.67024	0.249564	0.204177	0.559236	0	0	0	0	1.691	5.227	Putative Dihydroxyacetone synthase [Torrubiella hemipterigena]	6e-14	gi|729190950|emb|CEJ82293.1|	Up
TRINITY_DN9029_c0_g1	3.67024	0.249564	0.204167	0.559236	0	0	0	0	7.233	22.059	.	.	.
TRINITY_DN4031_c1_g1	3.67024	0.249564	0.204162	0.559236	0	0	0	0	9.925	30.138	prohibitin, putative [Cordyceps militaris CM01]	1e-49	gi|573991891|ref|XP_006673866.1|	Up
TRINITY_DN5331_c2_g1	3.67022	0.249564	0.204119	0.559236	0	0	0	0	12.681	38.4	.	.	.
TRINITY_DN5950_c0_g1	3.66981	7.21377	1.02145e-13	2.24975e-11	9.868	9.278	7.208	78.531	133.78	123.988	hypothetical protein CCM_03459 [Cordyceps militaris CM01]	0	gi|573981505|ref|XP_006668673.1|	Up
TRINITY_DN8275_c0_g1	3.6688	3.89815	0.00124397	0.01875	1.435	2.346	0.522	9.033	2.025	43.73	sulfate permease [Cordyceps militaris CM01]	0	gi|573974832|ref|XP_006665361.1|	Up
TRINITY_DN4443_c1_g2	3.66525	0.245668	0.290836	0.66233	0	0	0	0	4.655	0	Histone H4 acetyltransferase, NuA4 complex, Eaf6 [Cordyceps militaris CM01]	4e-68	gi|573986949|ref|XP_006671395.1|	Up
TRINITY_DN648_c0_g1	3.66525	0.245668	0.290832	0.66233	0	0	0	0	36.383	0	.	.	.
TRINITY_DN1644_c0_g2	3.66525	0.245668	0.290825	0.66233	0	0	0	0	8.934	0	.	.	.
TRINITY_DN2550_c0_g19	3.66524	0.245668	0.290718	0.66233	0	0	0	0	2.014	0	GPI-anchored cell wall beta-1,3-endoglucanase EglC [Cordyceps militaris CM01]	0	gi|573982825|ref|XP_006669333.1|	Up
TRINITY_DN3620_c0_g1	3.66523	0.245668	0.2906	0.66233	0	0	0	0	13.735	0	.	.	.
TRINITY_DN4226_c0_g1	3.66522	0.245668	0.290468	0.66233	0	0	0	0	48.74	0	Acyl transferase/acyl hydrolase/lysophospholipase [Penicillium italicum]	8e-33	gi|700492063|gb|KGO76199.1|	Up
TRINITY_DN3551_c0_g1	3.65986	4.21223	0.00228076	0.0299233	0	0	8.04	18.983	53.364	33.391	nuclear protein SNF4 [Cordyceps militaris CM01]	0	gi|573993387|ref|XP_006674614.1|	Up
TRINITY_DN1410_c1_g1	3.65888	0.246967	0.201862	0.557364	0	0	0	0	24.433	8.262	hypothetical protein CCM_05075 [Cordyceps militaris CM01]	2e-16	gi|573984727|ref|XP_006670284.1|	Up
TRINITY_DN9470_c0_g1	3.65887	0.246967	0.201808	0.557364	0	0	0	0	48.062	16.125	.	.	.
TRINITY_DN5826_c0_g1	3.65886	0.246967	0.201796	0.557364	0	0	0	0	16.302	5.546	.	.	.
TRINITY_DN2018_c1_g1	3.65886	0.246967	0.201763	0.557364	0	0	0	0	34.296	11.56	.	.	.
TRINITY_DN9529_c0_g1	3.65885	0.246967	0.201757	0.557364	0	0	0	0	26.729	9.038	hypothetical protein CCM_01568 [Cordyceps militaris CM01]	1e-46	gi|573977684|ref|XP_006666787.1|	Up
TRINITY_DN11760_c0_g1	3.6579	0.248265	0.182326	0.533202	0	0	0	0	27.96	28.198	endothiapepsin precursor [Cordyceps militaris CM01]	3e-29	gi|573987679|ref|XP_006671760.1|	Up
TRINITY_DN8932_c0_g1	3.65789	0.248265	0.182299	0.533202	0	0	0	0	12.775	13.009	.	.	.
TRINITY_DN7365_c0_g1	3.65789	0.248265	0.182293	0.533202	0	0	0	0	14.466	14.698	hypothetical protein CCM_08403 [Cordyceps militaris CM01]	8e-44	gi|573991369|ref|XP_006673605.1|	Up
TRINITY_DN5260_c0_g2	3.65788	0.248265	0.182279	0.533202	0	0	0	0	4.091	3.869	hypothetical protein CCM_09325 [Cordyceps militaris CM01]	1e-72	gi|573993203|ref|XP_006674522.1|	Up
TRINITY_DN7690_c0_g1	3.65788	0.248265	0.182265	0.533202	0	0	0	0	18.004	18.247	Major facilitator superfamily transporter [Cordyceps militaris CM01]	2e-30	gi|573983743|ref|XP_006669792.1|	Up
TRINITY_DN5223_c1_g1	3.65787	0.248265	0.182264	0.533202	0	0	0	0	11.668	11.891	hypothetical protein BBAD15_g5107 [Beauveria bassiana D1-5]	2e-20	gi|701775514|gb|KGQ09556.1|	Up
TRINITY_DN10500_c0_g1	3.65787	0.248265	0.182256	0.533202	0	0	0	0	26.426	26.658	.	.	.
TRINITY_DN3930_c3_g1	3.65787	0.248265	0.182255	0.533202	0	0	0	0	18.39	18.635	Fungal transcriptional regulatory protein [Cordyceps militaris CM01]	1e-29	gi|573978164|ref|XP_006667027.1|	Up
TRINITY_DN2066_c0_g1	3.65787	0.248265	0.182254	0.533202	0	0	0	0	15.541	15.782	.	.	.
TRINITY_DN308_c1_g1	3.65786	0.248265	0.182235	0.533202	0	0	0	0	14.591	14.835	Transcription factor, fungi [Penicillium italicum]	3e-44	gi|700480811|gb|KGO67592.1|	Up
TRINITY_DN9836_c0_g1	3.65786	0.248265	0.182231	0.533202	0	0	0	0	23.754	23.999	.	.	.
TRINITY_DN4097_c0_g2	3.65775	3.78576	0.000197403	0.00427829	0	0.567	2.738	18.428	9.143	15.931	.	.	.
TRINITY_DN7263_c0_g1	3.65759	4.72491	1.97663e-08	1.58774e-06	4.127	3.759	4.644	61.24	38.961	58.896	hypothetical protein BBAD15_g3952 [Beauveria bassiana D1-5]	2e-139	gi|701776905|gb|KGQ10703.1|	Up
TRINITY_DN159_c0_g1	3.65467	1.06662	0.00761469	0.0740394	0	0	1.364	6.07	10.573	9.095	hypothetical protein CCM_00291 [Cordyceps militaris CM01]	2e-99	gi|573975138|ref|XP_006665514.1|	Up
TRINITY_DN3425_c0_g2	3.65413	4.67099	0.00282812	0.035442	0	5.817	0	15.723	35.308	22.458	hypothetical protein BBA_09157 [Beauveria bassiana ARSEF 2860]	2e-55	gi|667661289|ref|XP_008602476.1|	Up
TRINITY_DN5486_c0_g2	3.65126	2.36851	0.00183422	0.0253034	0	1.461	0	6.461	3.319	7.281	H(+)-myo-inositol cotransporter [Microsporum gypseum CBS 118893]	3e-153	gi|315048843|ref|XP_003173796.1|	Up
TRINITY_DN4923_c2_g1	3.65111	1.64159	0.0054296	0.058264	0	3.336	0	11.623	6.753	26.121	Multidrug resistance-associated protein 1 [Beauveria bassiana D1-5]	2e-51	gi|701777870|gb|KGQ11533.1|	Up
TRINITY_DN5694_c0_g1	3.64994	6.72989	1.26739e-13	2.75696e-11	7.781	6.797	12.994	100.381	124.262	117.746	C2H2 finger domain-containing protein [Cordyceps militaris CM01]	0	gi|573977892|ref|XP_006666891.1|	Up
TRINITY_DN5770_c1_g2	3.64711	5.18322	9.44857e-05	0.00234815	3.409	2.5	3.145	2.992	81.627	26.818	MFS multidrug transporter [Cordyceps militaris CM01]	0	gi|573981075|ref|XP_006668458.1|	Up
TRINITY_DN8943_c0_g1	3.64513	0.243408	0.205353	0.559766	0	0	0	5.611	0	20.13	.	.	.
TRINITY_DN3897_c0_g1	3.64512	0.243408	0.205291	0.559706	0	0	0	5.888	0	21.146	hypothetical protein CCM_00997 [Cordyceps militaris CM01]	6e-44	gi|573976546|ref|XP_006666218.1|	Up
TRINITY_DN9026_c0_g1	3.64512	0.243408	0.205253	0.559706	0	0	0	14.041	0	50.748	.	.	.
TRINITY_DN3176_c0_g1	3.64511	0.243408	0.205234	0.559706	0	0	0	7.389	0	26.555	.	.	.
TRINITY_DN5710_c2_g1	3.64511	0.243408	0.205229	0.559706	0	0	0	12.99	0	46.902	.	.	.
TRINITY_DN10461_c0_g1	3.64511	0.243408	0.205225	0.559706	0	0	0	10.658	0	38.4	hypothetical protein CCM_04597 [Cordyceps militaris CM01]	8e-41	gi|573983775|ref|XP_006669808.1|	Up
TRINITY_DN5901_c1_g1	3.64511	0.243408	0.205225	0.559706	0	0	0	6.041	0	21.682	.	.	.
TRINITY_DN9027_c0_g1	3.64511	0.243408	0.205207	0.559706	0	0	0	14.739	0	53.327	.	.	.
TRINITY_DN3957_c0_g2	3.64511	0.243408	0.205194	0.559706	0	0	0	5.486	0	33.197	alkaline serine protease AorO, putative [Cordyceps militaris CM01]	3e-43	gi|573990419|ref|XP_006673130.1|	Up
TRINITY_DN4495_c1_g1	3.64511	0.243408	0.205194	0.559706	0	0	0	5.439	0	19.514	.	.	.
TRINITY_DN4685_c0_g1	3.6451	0.243408	0.205169	0.559706	0	0	0	3.565	0	12.781	protein tyrosine/serine phosphatase [Beauveria bassiana ARSEF 2860]	3e-11	gi|667662017|ref|XP_008602840.1|	Up
TRINITY_DN4845_c1_g1	3.6427	1.05936	0.0108191	0.0949841	0	0	1.519	10.189	3.945	14.242	hypothetical protein S7711_04393 [Stachybotrys chartarum IBT 7711]	3e-28	gi|666407661|gb|KEY72800.1|	Up
TRINITY_DN8815_c0_g1	3.64033	1.0864	0.0222619	0.156401	0	3.173	0	2.772	32.313	13.272	.	.	.
TRINITY_DN4585_c0_g1	3.63617	3.78351	0.0131099	0.107741	2.115	2.307	0	15.752	37.875	0	phosphoglycerate mutase, 2,3-bisphosphoglycerate-independent [Cordyceps militaris CM01]	0	gi|573976584|ref|XP_006666237.1|	Up
TRINITY_DN8632_c0_g1	3.63351	3.91414	6.30426e-05	0.00168305	1.341	1.961	1.848	7.159	41.81	15.543	ammonium transporter MEP1 [Cordyceps militaris CM01]	0	gi|573987075|ref|XP_006671458.1|	Up
TRINITY_DN6128_c0_g1	3.6326	2.85975	0.0278711	0.182747	0	2.798	0	0	16.417	18.476	phosphoesterase superfamily protein [Cordyceps militaris CM01]	0	gi|573984229|ref|XP_006670035.1|	Up
TRINITY_DN5409_c0_g1	3.63245	9.54726	1.68195e-13	3.5281e-11	23.967	26.131	28.93	363.579	196.631	408.95	hypothetical protein CCM_04507 [Cordyceps militaris CM01]	0	gi|573983595|ref|XP_006669718.1|	Up
TRINITY_DN10875_c0_g1	3.63005	0.24211	0.147317	0.478563	0	0	0	9.511	11.293	22.835	ferulic acid esterase A faeA [Cordyceps militaris CM01]	6e-48	gi|573975372|ref|XP_006665631.1|	Up
TRINITY_DN374_c1_g1	3.63004	0.24211	0.147296	0.478563	0	0	0	13.19	15.77	31.759	trypsin-related protease [Cordyceps militaris CM01]	2e-29	gi|573993153|ref|XP_006674497.1|	Up
TRINITY_DN2831_c1_g1	3.63003	0.24211	0.147249	0.478563	0	0	0	6.595	7.775	15.782	hypothetical protein CCM_07098 [Cordyceps militaris CM01]	6e-56	gi|573988757|ref|XP_006672299.1|	Up
TRINITY_DN7938_c0_g1	3.63002	0.24211	0.147217	0.478563	0	0	0	7.178	8.475	17.186	.	.	.
TRINITY_DN6669_c0_g1	3.63	0.24211	0.147127	0.478563	0	0	0	5.391	6.335	12.907	.	.	.
TRINITY_DN11452_c0_g1	3.62998	0.24211	0.147037	0.478563	0	0	0	8.564	10.145	20.541	aminotransferase [Cordyceps militaris CM01]	2e-24	gi|573978292|ref|XP_006667091.1|	Up
TRINITY_DN4544_c4_g1	3.62997	0.24211	0.146997	0.478563	0	0	0	7.857	9.289	18.829	Fungal transcriptional regulatory protein [Cordyceps militaris CM01]	3e-26	gi|573992871|ref|XP_006674356.1|	Up
TRINITY_DN7795_c0_g1	3.62997	0.24211	0.146995	0.478563	0	0	0	4.97	5.834	11.891	hypothetical protein CCM_04851 [Cordyceps militaris CM01]	1e-30	gi|573984279|ref|XP_006670060.1|	Up
TRINITY_DN1908_c1_g1	3.62996	0.24211	0.146976	0.478563	0	0	0	5.888	6.93	14.093	.	.	.
TRINITY_DN8606_c0_g1	3.62993	0.24211	0.146836	0.478563	0	0	0	7.618	9.007	18.247	Methyltransferase type 11 [Cordyceps militaris CM01]	2e-51	gi|573979610|ref|XP_006667750.1|	Up
TRINITY_DN3126_c0_g1	3.62992	0.24211	0.146818	0.478563	0	0	0	4.731	5.552	11.32	hypothetical protein O988_08142 [Pseudogymnoascus pannorum VKM F-3808]	2e-11	gi|682264153|gb|KFX90549.1|	Up
TRINITY_DN9485_c0_g1	3.62992	0.24211	0.146817	0.478563	0	0	0	8.765	10.385	21.02	.	.	.
TRINITY_DN10112_c0_g1	3.62992	0.24211	0.146816	0.478563	0	0	0	7.245	8.558	17.357	short chain dehydrogenase/reductase family [Cordyceps militaris CM01]	3e-12	gi|573979888|ref|XP_006667889.1|	Up
TRINITY_DN10796_c0_g1	3.62988	0.24211	0.146658	0.478563	0	0	0	7.78	9.195	18.635	.	.	.
TRINITY_DN1738_c0_g1	3.62984	0.24211	0.146499	0.478563	0	0	0	5.19	6.095	12.427	equisetin synthetase, putative [Aspergillus clavatus NRRL 1]	2e-46	gi|121701571|ref|XP_001269050.1|	Up
TRINITY_DN10634_c0_g1	3.62984	0.24211	0.146499	0.478563	0	0	0	14.041	16.814	33.836	.	.	.
TRINITY_DN3398_c0_g1	3.6298	0.24211	0.14635	0.478563	0	0	0	8.564	10.145	20.541	.	.	.
TRINITY_DN9864_c0_g1	3.62979	0.24211	0.146314	0.478563	0	0	0	7.389	8.725	17.7	.	.	.
TRINITY_DN3077_c0_g1	3.62868	0.239515	0.201962	0.557364	0	0	0	7.694	27.292	0	.	.	.
TRINITY_DN3883_c1_g1	3.62868	0.239515	0.201951	0.557364	0	0	0	2.877	10.082	0	MFS multidrug transporter, putative [Cordyceps militaris CM01]	7e-13	gi|573980797|ref|XP_006668319.1|	Up
TRINITY_DN10371_c0_g1	3.62867	0.239515	0.201922	0.557364	0	0	0	6.251	22.084	0	.	.	.
TRINITY_DN398_c1_g1	3.62867	0.239515	0.201912	0.557364	0	0	0	3.823	13.422	0	hypothetical protein CCM_07285 [Cordyceps militaris CM01]	2e-27	gi|573989131|ref|XP_006672486.1|	Up
TRINITY_DN1463_c1_g1	3.62867	0.239515	0.201874	0.557364	0	0	0	10.38	37.041	0	.	.	.
TRINITY_DN11548_c0_g1	3.62746	0.240812	0.145072	0.47667	0	0	0	13.391	32.041	16.125	.	.	.
TRINITY_DN1676_c0_g1	3.62746	0.240812	0.145071	0.47667	0	0	0	6.089	14.34	7.292	muramidase, putative [Cordyceps militaris CM01]	5e-50	gi|573991519|ref|XP_006673680.1|	Up
TRINITY_DN9206_c0_g1	3.62746	0.240812	0.145061	0.47667	0	0	0	13.821	33.085	16.65	.	.	.
TRINITY_DN8955_c0_g1	3.62746	0.240812	0.145053	0.47667	0	0	0	7.857	18.578	9.415	.	.	.
TRINITY_DN5802_c1_g1	3.62745	0.240812	0.145029	0.47667	0	0	0	4.731	11.094	5.66	.	.	.
TRINITY_DN11794_c0_g1	3.62745	0.240812	0.145027	0.47667	0	0	0	10.801	25.706	12.975	hypothetical protein CCM_04815 [Cordyceps militaris CM01]	1e-42	gi|573984207|ref|XP_006670024.1|	Up
TRINITY_DN3474_c1_g1	3.62745	0.240812	0.145025	0.47667	0	0	0	9.291	22.032	11.138	serine/threonine-protein kinase sck1 [Cordyceps militaris CM01]	7e-15	gi|573986869|ref|XP_006671355.1|	Up
TRINITY_DN10888_c0_g1	3.62745	0.240812	0.145022	0.47667	0	0	0	9.749	23.149	11.697	Acyl transferase/acyl hydrolase/lysophospholipase [Penicillium expansum]	1e-38	gi|700461527|gb|KGO50685.1|	Up
TRINITY_DN9899_c0_g1	3.62745	0.240812	0.144996	0.47667	0	0	0	6.194	14.591	7.418	hypothetical protein CCM_00234 [Cordyceps militaris CM01]	1e-12	gi|573975024|ref|XP_006665457.1|	Up
TRINITY_DN2505_c0_g2	3.62287	7.53337	1.40429e-11	1.99545e-09	35.525	43.956	35.248	745.069	385.915	272.991	period circadian protein, putative [Cordyceps militaris CM01]	5e-66	gi|573976370|ref|XP_006666130.1|	Up
TRINITY_DN2142_c0_g1	3.6202	4.56226	0.0170454	0.129745	2.512	3.23	0	61.804	9.56	0	vesicular-fusion protein SEC18 [Cordyceps militaris CM01]	0	gi|573991599|ref|XP_006673720.1|	Up
TRINITY_DN9903_c0_g1	3.61851	0.234661	0.140744	0.4704	0	0	0	10.868	6.387	6.505	.	.	.
TRINITY_DN9234_c0_g1	3.61851	0.234661	0.140747	0.4704	0	0	0	29	17.377	17.483	.	.	.
TRINITY_DN8575_c0_g1	3.61851	0.234661	0.140758	0.4704	0	0	0	23.122	13.777	13.899	.	.	.
TRINITY_DN2018_c0_g1	3.61851	0.234661	0.140764	0.4704	0	0	0	11.04	6.492	6.607	NAD(P)-binding domain [Cordyceps militaris CM01]	9e-39	gi|573991499|ref|XP_006673670.1|	Up
TRINITY_DN839_c1_g1	3.61851	0.234661	0.140765	0.4704	0	0	0	10.466	6.147	6.254	.	.	.
TRINITY_DN8848_c0_g1	3.61851	0.234661	0.140769	0.4704	0	0	0	20.244	12.034	12.153	.	.	.
TRINITY_DN1872_c1_g1	3.61851	0.234661	0.140771	0.4704	0	0	0	12.177	7.17	7.292	.	.	.
TRINITY_DN7976_c0_g1	3.6185	0.234661	0.140775	0.4704	0	0	0	10.084	5.918	6.037	hypothetical protein CCM_02364 [Cordyceps militaris CM01]	6e-64	gi|573979268|ref|XP_006667579.1|	Up
TRINITY_DN9835_c0_g1	3.6185	0.234661	0.140779	0.4704	0	0	0	17.138	10.145	10.271	hypothetical protein CCM_09666 [Cordyceps militaris CM01]	5e-14	gi|573993883|ref|XP_006674862.1|	Up
TRINITY_DN1938_c1_g1	3.6185	0.234661	0.140785	0.4704	0	0	0	15.551	9.195	9.312	.	.	.
TRINITY_DN1040_c1_g1	3.6185	0.234661	0.140789	0.4704	0	0	0	16.048	9.498	9.62	.	.	.
TRINITY_DN4856_c2_g1	3.6185	0.234661	0.140792	0.4704	0	0	0	19.031	11.293	11.412	pfs domain-containing protein [Cordyceps militaris CM01]	2e-30	gi|573981923|ref|XP_006668882.1|	Up
TRINITY_DN10436_c0_g1	3.61849	0.234661	0.140834	0.4704	0	0	0	17.138	10.145	10.271	.	.	.
TRINITY_DN10389_c0_g1	3.61849	0.234661	0.140849	0.4704	0	0	0	14.93	8.819	8.947	.	.	.
TRINITY_DN6823_c0_g1	3.61849	0.234661	0.140849	0.4704	0	0	0	17.329	10.259	10.385	.	.	.
TRINITY_DN6853_c0_g1	3.61848	0.234661	0.140864	0.4704	0	0	0	17.731	10.51	10.624	.	.	.
TRINITY_DN11686_c0_g1	3.61848	0.234661	0.140878	0.4704	0	0	0	22.806	13.589	13.705	hypothetical protein CCM_00976 [Cordyceps militaris CM01]	2e-38	gi|573976504|ref|XP_006666197.1|	Up
TRINITY_DN3513_c1_g1	3.61848	0.234661	0.140878	0.4704	0	0	0	21.038	12.514	12.633	.	.	.
TRINITY_DN6991_c0_g1	3.61848	0.234661	0.140883	0.4704	0	0	0	19.499	11.575	11.697	.	.	.
TRINITY_DN8864_c0_g1	3.61847	0.234661	0.140911	0.4704	0	0	0	13.181	7.775	7.897	hypothetical protein CCM_00558 [Cordyceps militaris CM01]	3e-20	gi|573975672|ref|XP_006665781.1|	Up
TRINITY_DN1546_c1_g1	3.61847	0.234661	0.140922	0.4704	0	0	0	16.947	10.03	10.156	alpha,alpha-trehalose glucohydrolase TreA/Ath1 [Cordyceps militaris CM01]	9e-43	gi|573978352|ref|XP_006667121.1|	Up
TRINITY_DN10658_c0_g1	3.61846	0.234661	0.140936	0.4704	0	0	0	25.588	15.29	15.394	.	.	.
TRINITY_DN7258_c1_g1	3.61715	3.19229	0.000156562	0.00350958	2.238	0	1.645	16.421	11.616	22.435	hypothetical protein CCM_09490 [Cordyceps militaris CM01]	0	gi|573993531|ref|XP_006674686.1|	Up
TRINITY_DN5728_c1_g1	3.61614	0.235958	0.176264	0.527833	0	0	0	17.731	0	21.26	.	.	.
TRINITY_DN1784_c0_g1	3.61614	0.235958	0.176301	0.527833	0	0	0	20.244	0	24.307	alpha/beta hydrolase fold-3 [Cordyceps militaris CM01]	5e-43	gi|573989613|ref|XP_006672727.1|	Up
TRINITY_DN4544_c0_g1	3.61614	0.235958	0.176312	0.527833	0	0	0	19.986	0	23.999	.	.	.
TRINITY_DN935_c0_g1	3.61614	0.235958	0.176319	0.527833	0	0	0	1.807	0	1.837	hypothetical protein CCM_02273 [Cordyceps militaris CM01]	3e-49	gi|573979086|ref|XP_006667488.1|	Up
TRINITY_DN8003_c0_g1	3.61614	0.235958	0.176328	0.527833	0	0	0	17.329	0	20.781	putative lipoprotein [Cordyceps militaris CM01]	1e-43	gi|573979358|ref|XP_006667624.1|	Up
TRINITY_DN1983_c0_g1	3.61613	0.235958	0.176375	0.527833	0	0	0	9.73	0	11.64	zinc-binding dehydrogenase family oxidoreductase, putative [Cordyceps militaris CM01]	2e-55	gi|573987509|ref|XP_006671675.1|	Up
TRINITY_DN10788_c0_g1	3.61613	0.235958	0.176383	0.527833	0	0	0	9.272	0	11.092	.	.	.
TRINITY_DN4953_c1_g1	3.61613	0.235958	0.176405	0.527833	0	0	0	16.22	0	19.446	hypothetical protein CCM_07853 [Cordyceps militaris CM01]	7e-49	gi|573990271|ref|XP_006673056.1|	Up
TRINITY_DN11769_c0_g1	3.61613	0.235958	0.176411	0.527833	0	0	0	19.986	0	23.999	penicillin-binding protein, putative [Cordyceps militaris CM01]	4e-45	gi|573986687|ref|XP_006671264.1|	Up
TRINITY_DN4397_c3_g1	3.61613	0.235958	0.176431	0.527833	0	0	0	16.048	0	19.229	hypothetical protein CCM_07853 [Cordyceps militaris CM01]	1e-46	gi|573990271|ref|XP_006673056.1|	Up
TRINITY_DN3545_c1_g1	3.61613	0.235958	0.176462	0.527833	0	0	0	14.787	0	17.7	Protein kinase-like domain [Cordyceps militaris CM01]	7e-18	gi|573975778|ref|XP_006665834.1|	Up
TRINITY_DN4114_c1_g1	3.61613	0.235958	0.176463	0.527833	0	0	0	9.338	0	11.161	.	.	.
TRINITY_DN4544_c1_g1	3.61613	0.235958	0.176465	0.527833	0	0	0	11.489	0	13.751	.	.	.
TRINITY_DN637_c0_g1	3.61612	0.235958	0.176495	0.527833	0	0	0	12.607	0	15.086	cellulase, putative [Cordyceps militaris CM01]	5e-54	gi|573983683|ref|XP_006669762.1|	Up
TRINITY_DN10340_c0_g1	3.61612	0.235958	0.176517	0.527833	0	0	0	15.714	0	18.829	hypothetical protein CCM_07562 [Cordyceps militaris CM01]	2e-48	gi|573989691|ref|XP_006672766.1|	Up
TRINITY_DN3043_c0_g1	3.61612	0.235958	0.176535	0.527833	0	0	0	28.532	0	34.395	.	.	.
TRINITY_DN745_c0_g1	3.61612	0.235958	0.176553	0.527833	0	0	0	13.554	0	16.227	amidase, putative [Cordyceps militaris CM01]	7e-52	gi|573975150|ref|XP_006665520.1|	Up
TRINITY_DN3076_c0_g1	3.61612	0.235958	0.176568	0.527833	0	0	0	15.389	0	18.441	.	.	.
TRINITY_DN9011_c0_g1	3.61612	0.235958	0.176569	0.527833	0	0	0	12.082	0	14.459	.	.	.
TRINITY_DN617_c0_g2	3.61612	0.235958	0.176574	0.527833	0	0	0	5.62	0	5.729	hypothetical protein CCM_00651 [Cordyceps militaris CM01]	3e-15	gi|573975856|ref|XP_006665873.1|	Up
TRINITY_DN10854_c0_g1	3.61612	0.235958	0.176603	0.527833	0	0	0	26.782	0	32.25	.	.	.
TRINITY_DN10076_c0_g1	3.61611	0.235958	0.176613	0.527833	0	0	0	14.213	0	17.015	.	.	.
TRINITY_DN7823_c0_g1	3.61611	0.235958	0.176623	0.527833	0	0	0	20.77	0	24.935	.	.	.
TRINITY_DN302_c1_g1	3.61536	1.54525	0.0209881	0.150207	1.199	0	1.093	0	17.012	17.574	Major facilitator superfamily transporter [Cordyceps militaris CM01]	2e-145	gi|573983743|ref|XP_006669792.1|	Up
TRINITY_DN9819_c0_g1	3.61484	1.08827	0.0223996	0.157181	0	1.932	0	20.225	1.962	6.06	glutamyl-tRNA(Gln) amidotransferase [Cordyceps militaris CM01]	4e-129	gi|573975300|ref|XP_006665595.1|	Up
TRINITY_DN9505_c0_g1	3.61279	7.35454	6.79189e-10	7.62249e-08	12.333	24.526	19.003	103.88	205.889	366.054	d-3-phosphoglycerate dehydrogenase [Cordyceps militaris CM01]	0	gi|573984769|ref|XP_006670305.1|	Up
TRINITY_DN3460_c0_g1	3.60863	4.74573	3.23429e-07	1.87461e-05	0.718	3.067	3.067	24.746	22.732	36.107	hypothetical protein PV07_09762 [Cladophialophora immunda]	0	gi|759247355|gb|KIW24023.1|	Up
TRINITY_DN2651_c0_g1	3.60798	0.233365	0.176018	0.527833	0	0	0	22.806	27.178	0	hypothetical protein CCM_00439 [Cordyceps militaris CM01]	4e-41	gi|573975434|ref|XP_006665662.1|	Up
TRINITY_DN3823_c0_g1	3.60797	0.233365	0.176064	0.527833	0	0	0	4.76	5.218	0	pre-rRNA processing protein Utp22 [Cordyceps militaris CM01]	1e-57	gi|573977070|ref|XP_006666480.1|	Up
TRINITY_DN367_c0_g1	3.60797	0.233365	0.176075	0.527833	0	0	0	16.765	19.841	0	.	.	.
TRINITY_DN3585_c0_g1	3.60797	0.233365	0.176076	0.527833	0	0	0	3.546	4.123	0	metalloprotease 1 [Cordyceps militaris CM01]	3e-73	gi|573985411|ref|XP_006670626.1|	Up
TRINITY_DN2502_c1_g1	3.60796	0.233365	0.176108	0.527833	0	0	0	5.735	6.69	0	alcohol dehydrogenase, putative [Cordyceps militaris CM01]	2e-90	gi|573993243|ref|XP_006674542.1|	Up
TRINITY_DN4017_c1_g1	3.60796	0.233365	0.176112	0.527833	0	0	0	16.048	18.985	0	.	.	.
TRINITY_DN7923_c0_g1	3.60796	0.233365	0.176117	0.527833	0	0	0	15.389	18.192	0	.	.	.
TRINITY_DN2400_c0_g1	3.60796	0.233365	0.176144	0.527833	0	0	0	10.954	12.879	0	.	.	.
TRINITY_DN8033_c0_g1	3.60795	0.233365	0.176188	0.527833	0	0	0	26.782	32.041	0	.	.	.
TRINITY_DN7742_c0_g1	3.60794	0.233365	0.176221	0.527833	0	0	0	21.315	25.362	0	.	.	.
TRINITY_DN5722_c2_g1	3.60794	0.233365	0.176222	0.527833	0	0	0	21.315	25.362	0	.	.	.
TRINITY_DN10407_c0_g1	3.60706	1.58743	0.00220464	0.0291197	1.643	1.923	0	16.775	15.593	16.079	.	.	.
TRINITY_DN3125_c0_g1	3.60136	1.03879	0.0380674	0.224857	0	0	3.261	36.79	0	22.002	.	.	.
TRINITY_DN5486_c0_g1	3.59658	4.25576	1.37662e-05	0.000471909	2.115	1.673	2.225	8.727	21.49	44.551	H(+)-myo-inositol cotransporter [Microsporum gypseum CBS 118893]	0	gi|315048843|ref|XP_003173796.1|	Up
TRINITY_DN10495_c0_g2	3.59642	3.39806	0.00178498	0.0248235	2.691	3.202	0	3.651	40.099	27.788	hypothetical protein CCM_04245 [Cordyceps militaris CM01]	0	gi|573983071|ref|XP_006669456.1|	Up
TRINITY_DN4887_c0_g1	3.59599	8.49923	7.82181e-09	6.99595e-07	26.979	34.544	38.141	119.049	381.062	690.295	acyl-CoA dehydrogenase [Beauveria bassiana ARSEF 2860]	0	gi|667654553|ref|XP_008599108.1|	Up
TRINITY_DN5880_c2_g1	3.58948	1.03477	0.0213656	0.152207	0	0	1.713	19.126	8.903	2.294	.	.	.
TRINITY_DN5322_c2_g1	3.58723	0.228514	0.191374	0.54462	0	0	0	38.96	0	15.634	.	.	.
TRINITY_DN9703_c0_g1	3.58722	0.228514	0.191392	0.54462	0	0	0	22.395	0	8.947	.	.	.
TRINITY_DN1435_c0_g1	3.58722	0.228514	0.191404	0.54462	0	0	0	18.266	0	7.292	.	.	.
TRINITY_DN4656_c0_g1	3.58721	0.228514	0.191424	0.54462	0	0	0	14.395	0	5.74	.	.	.
TRINITY_DN11803_c0_g1	3.58721	0.228514	0.191434	0.54462	0	0	0	40.174	0	16.125	.	.	.
TRINITY_DN3639_c0_g1	3.58721	0.228514	0.19144	0.54462	0	0	0	44.217	0	17.779	.	.	.
TRINITY_DN9741_c0_g1	3.5872	0.228514	0.191462	0.54462	0	0	0	12.856	0	5.124	hypothetical protein CCM_01742 [Cordyceps militaris CM01]	2e-49	gi|573978030|ref|XP_006666960.1|	Up
TRINITY_DN10421_c0_g1	3.58718	0.228514	0.191535	0.54462	0	0	0	35.175	0	14.093	.	.	.
TRINITY_DN10574_c0_g1	3.58717	0.228514	0.191574	0.54462	0	0	0	28.541	0	11.412	.	.	.
TRINITY_DN7932_c0_g1	3.58716	0.228514	0.191591	0.54462	0	0	0	14.596	0	5.82	.	.	.
TRINITY_DN6854_c0_g1	3.58715	0.228514	0.191635	0.54462	0	0	0	19.958	0	7.965	Protein phosphatase 2C [Cordyceps militaris CM01]	2e-39	gi|573992375|ref|XP_006674108.1|	Up
TRINITY_DN8704_c0_g1	3.58715	0.228514	0.191637	0.54462	0	0	0	12.856	0	5.124	hypothetical protein CCM_07853 [Cordyceps militaris CM01]	8e-65	gi|573990271|ref|XP_006673056.1|	Up
TRINITY_DN7632_c0_g1	3.58714	0.228514	0.191665	0.54462	0	0	0	29.248	0	11.697	.	.	.
TRINITY_DN8045_c0_g1	3.58713	0.228514	0.191698	0.54462	0	0	0	15.131	0	6.037	.	.	.
TRINITY_DN7635_c0_g1	3.58712	0.228514	0.191729	0.54462	0	0	0	35.175	0	14.093	pyruvate dehydrogenase protein x component [Cordyceps militaris CM01]	6e-11	gi|573978162|ref|XP_006667026.1|	Up
TRINITY_DN3432_c0_g1	3.58712	0.228514	0.191736	0.54462	0	0	0	13.907	0	5.546	.	.	.
TRINITY_DN9912_c0_g1	3.58712	0.228514	0.191744	0.54462	0	0	0	26.295	0	10.51	.	.	.
TRINITY_DN11776_c0_g1	3.58711	0.228514	0.191745	0.54462	0	0	0	22.624	0	9.038	hypothetical protein CCM_08288 [Cordyceps militaris CM01]	3e-19	gi|573991139|ref|XP_006673490.1|	Up
TRINITY_DN7326_c0_g1	3.58711	0.228514	0.191749	0.54462	0	0	0	34.687	0	13.899	.	.	.
TRINITY_DN7030_c0_g1	3.58711	0.228514	0.191776	0.54462	0	0	0	12.856	0	5.124	Glycosyltransferase [Cordyceps militaris CM01]	5e-73	gi|573978024|ref|XP_006666957.1|	Up
TRINITY_DN11373_c0_g1	3.5871	0.228514	0.191783	0.54462	0	0	0	14.29	0	5.694	.	.	.
TRINITY_DN1818_c1_g1	3.5871	0.228514	0.191792	0.54462	0	0	0	42.114	0	16.912	hypothetical protein CCM_06467 [Cordyceps militaris CM01]	6e-25	gi|573987501|ref|XP_006671671.1|	Up
TRINITY_DN7139_c0_g1	3.5871	0.228514	0.191793	0.54462	0	0	0	31.15	0	12.473	.	.	.
TRINITY_DN5145_c1_g1	3.5871	0.228514	0.191802	0.54462	0	0	0	23.093	0	9.221	hypothetical protein CCM_08767 [Cordyceps militaris CM01]	4e-11	gi|573992091|ref|XP_006673966.1|	Up
TRINITY_DN6750_c0_g1	3.5826	0.227219	0.190768	0.54462	0	0	0	35.681	14.184	0	.	.	.
TRINITY_DN583_c0_g1	3.5826	0.227219	0.190778	0.54462	0	0	0	41.454	16.542	0	.	.	.
TRINITY_DN5426_c0_g1	3.5826	0.227219	0.190779	0.54462	0	0	0	3.575	1.858	0	hypothetical protein CCM_07041 [Cordyceps militaris CM01]	4e-32	gi|573988643|ref|XP_006672242.1|	Up
TRINITY_DN7841_c0_g1	3.5826	0.227219	0.19079	0.54462	0	0	0	37.813	15.05	0	.	.	.
TRINITY_DN7011_c0_g1	3.58259	0.227219	0.190797	0.54462	0	0	0	41.454	16.542	0	.	.	.
TRINITY_DN2434_c1_g1	3.58259	0.227219	0.190801	0.54462	0	0	0	13.907	5.438	0	.	.	.
TRINITY_DN10751_c0_g1	3.58259	0.227219	0.190806	0.54462	0	0	0	22.175	8.725	0	.	.	.
TRINITY_DN11683_c0_g1	3.58258	0.227219	0.190823	0.54462	0	0	0	27.222	10.76	0	.	.	.
TRINITY_DN4558_c2_g1	3.58258	0.227219	0.190829	0.54462	0	0	0	25.702	10.145	0	.	.	.
TRINITY_DN6617_c0_g1	3.58258	0.227219	0.19084	0.54462	0	0	0	31.562	12.514	0	.	.	.
TRINITY_DN10832_c0_g1	3.58257	0.227219	0.190852	0.54462	0	0	0	36.188	14.392	0	.	.	.
TRINITY_DN7054_c0_g1	3.58257	0.227219	0.19087	0.54462	0	0	0	24.603	9.706	0	.	.	.
TRINITY_DN5934_c1_g1	3.58256	0.227219	0.190879	0.54462	0	0	0	24.335	9.592	0	PH domain protein [Cordyceps militaris CM01]	5e-13	gi|573987295|ref|XP_006671568.1|	Up
TRINITY_DN1479_c1_g1	3.58256	0.227219	0.1909	0.54462	0	0	0	28.541	11.293	0	.	.	.
TRINITY_DN1188_c1_g1	3.58254	0.227219	0.190931	0.54462	0	0	0	25.138	9.925	0	.	.	.
TRINITY_DN4395_c2_g1	3.58254	0.227219	0.190942	0.54462	0	0	0	12.617	4.926	0	.	.	.
TRINITY_DN9554_c0_g1	3.58252	0.227219	0.190993	0.54462	0	0	0	21.736	8.558	0	.	.	.
TRINITY_DN5850_c1_g1	3.58251	0.227219	0.191026	0.54462	0	0	0	11.221	4.373	0	.	.	.
TRINITY_DN7955_c0_g1	3.5825	0.227219	0.191058	0.54462	0	0	0	9.988	3.893	0	Ferric reductase-like transmembrane component [Cordyceps militaris CM01]	2e-51	gi|573991441|ref|XP_006673641.1|	Up
TRINITY_DN4938_c0_g2	3.58247	6.56205	1.03006e-06	5.09448e-05	52.079	21.305	24.769	69.049	500.616	598.83	.	.	.
TRINITY_DN10501_c0_g1	3.58016	1.02094	0.0149252	0.11846	0	0	1.451	3.231	13.13	9.677	glutathione S-transferase, putative [Cordyceps militaris CM01]	3e-125	gi|573978672|ref|XP_006667281.1|	Up
TRINITY_DN967_c0_g2	3.56333	8.11182	5.13035e-13	9.51545e-11	80.276	67.26	82.832	1178.99	963.545	556.059	mismatched base pair and cruciform DNA recognition protein, putative [Cordyceps militaris CM01]	2e-105	gi|573990817|ref|XP_006673329.1|	Up
TRINITY_DN6122_c1_g1	3.55951	5.19484	5.37042e-08	3.83143e-06	9.169	8.845	7.15	40.575	129.918	113.638	Calycin-like protein [Cordyceps militaris CM01]	9e-87	gi|573985977|ref|XP_006670909.1|	Up
TRINITY_DN7594_c0_g1	3.55933	4.61042	4.4024e-05	0.00125518	4.108	3.942	2.061	10.275	26.875	81.765	cytidine/deoxycytidylate deaminase family protein [Cordyceps militaris CM01]	3e-139	gi|573983279|ref|XP_006669560.1|	Up
TRINITY_DN5190_c0_g1	3.55829	5.97332	2.40871e-07	1.45347e-05	4.977	3.75	3.928	74.383	63.216	10.43	YT521-B-like splicing factor, putative [Cordyceps militaris CM01]	0	gi|573988201|ref|XP_006672021.1|	Up
TRINITY_DN11261_c0_g1	3.55816	3.17566	0.000159115	0.00354437	0.425	1.481	1.945	9.033	25.393	12.393	aspartic endopeptidase (AP1), putative [Cordyceps militaris CM01]	0	gi|573991093|ref|XP_006673467.1|	Up
TRINITY_DN5315_c1_g1	3.5571	1.57403	0.00506657	0.0550388	0	2.48	0	5.4	11.272	14.242	pfs domain-containing protein [Cordyceps militaris CM01]	8e-122	gi|573981923|ref|XP_006668882.1|	Up
TRINITY_DN3656_c0_g1	3.54884	5.81114	2.81587e-08	2.18571e-06	5.808	6.076	7.673	138.041	29.86	61.977	C6 finger domain protein, putative [Cordyceps militaris CM01]	4e-161	gi|573993627|ref|XP_006674734.1|	Up
TRINITY_DN10439_c0_g1	3.54846	2.87358	0.000519769	0.00937393	0.434	1.538	1.209	12.923	5.156	20.313	hypothetical protein CCM_00975 [Cordyceps militaris CM01]	5e-116	gi|573976502|ref|XP_006666196.1|	Up
TRINITY_DN1603_c0_g1	3.5478	2.66659	0.000272266	0.00556548	2.918	1.144	1.79	27.796	11.512	33.334	.	.	.
TRINITY_DN7444_c0_g1	3.54657	5.74214	0.00374542	0.0434186	5.666	11.22	9.617	238.68	69.844	0	2,5-diketo-D-gluconic acid reductase A [Cordyceps militaris CM01]	0	gi|573982281|ref|XP_006669061.1|	Up
TRINITY_DN5546_c0_g2	3.5461	1.01468	0.0100484	0.0904715	1.341	0	0	5.697	6.001	10.031	hypothetical protein CCM_02242 [Cordyceps militaris CM01]	7e-50	gi|573979024|ref|XP_006667457.1|	Up
TRINITY_DN7568_c0_g1	3.53798	2.22144	0.0027929	0.0352261	0.727	1.711	0.668	3.718	11.199	23.189	alcohol dehydrogenase [Cordyceps militaris CM01]	0	gi|573975458|ref|XP_006665674.1|	Up
TRINITY_DN2354_c0_g1	3.53737	3.64123	2.22792e-05	0.000703512	1.228	1.433	1.413	22.443	8.652	16.832	Rho GTPase activation protein [Cordyceps militaris CM01]	0	gi|573993385|ref|XP_006674613.1|	Up
TRINITY_DN4144_c1_g2	3.53528	5.5675	1.21805e-06	5.80055e-05	15.676	8.364	5.467	46.262	227.169	65.035	hypothetical protein CCM_01211 [Cordyceps militaris CM01]	0	gi|573976972|ref|XP_006666431.1|	Up
TRINITY_DN5710_c0_g1	3.5326	4.18376	4.51047e-06	0.00017661	2.276	0.961	2.351	31.026	12.472	22.926	MFS transporter, putative [Cordyceps militaris CM01]	0	gi|573985607|ref|XP_006670724.1|	Up
TRINITY_DN3240_c0_g1	3.53176	2.99178	0.00308969	0.0378363	3.277	0	0	6.681	21.584	11.024	FAD-binding, type 2 [Cordyceps militaris CM01]	0	gi|573986775|ref|XP_006671308.1|	Up
TRINITY_DN9655_c0_g2	3.52738	1.52152	0.0121668	0.103116	1.19	0	0	12.521	2.067	6.664	C6 zinc finger domain protein [Cordyceps militaris CM01]	1e-33	gi|573984591|ref|XP_006670216.1|	Up
TRINITY_DN3585_c1_g1	3.52684	1.00522	0.0126351	0.105213	3.39	0	0	20.923	8.151	25.026	metalloprotease 1 [Cordyceps militaris CM01]	3e-53	gi|573985411|ref|XP_006670626.1|	Up
TRINITY_DN2816_c1_g1	3.52544	0.221076	0.28646	0.66233	0	0	0	31.103	0	0	.	.	.
TRINITY_DN5685_c0_g1	3.52541	0.221076	0.286575	0.66233	0	0.913	0	33.234	1.096	0	.	.	.
TRINITY_DN2405_c0_g1	3.52538	0.221076	0.28669	0.66233	0	0	0	7.341	0	0	DSB repair complex subunit Ku70, putative [Cordyceps militaris CM01]	2e-76	gi|573980595|ref|XP_006668218.1|	Up
TRINITY_DN5739_c0_g3	3.52538	0.221076	0.28672	0.66233	0	0	0	2.954	0	0	.	.	.
TRINITY_DN4869_c0_g1	3.52537	0.221076	0.286739	0.66233	0	0	0	22.978	0	0	hypothetical protein CCM_03560 [Cordyceps militaris CM01]	1e-58	gi|573981707|ref|XP_006668774.1|	Up
TRINITY_DN4473_c4_g1	3.52537	0.221076	0.286741	0.66233	0	0	0	21.908	0	0	.	.	.
TRINITY_DN749_c1_g1	3.52537	0.221076	0.286751	0.66233	0	0	0	27.365	0	0	.	.	.
TRINITY_DN5642_c3_g1	3.52537	0.221076	0.286757	0.66233	0	0	0	21.248	0	0	hypothetical protein CCM_07357 [Cordyceps militaris CM01]	6e-18	gi|573989281|ref|XP_006672561.1|	Up
TRINITY_DN6995_c0_g1	3.52536	0.221076	0.286775	0.66233	0	0	0	30.787	0	0	.	.	.
TRINITY_DN8024_c0_g1	3.52536	0.221076	0.286793	0.66233	0	0	0	41.54	0	0	6-phosphogluconate dehydrogenase [Cordyceps militaris CM01]	3e-43	gi|573988815|ref|XP_006672328.1|	Up
TRINITY_DN10756_c0_g1	3.52536	0.221076	0.286812	0.66233	0	0	0	30.472	0	0	.	.	.
TRINITY_DN5802_c2_g1	3.52533	0.221076	0.286934	0.66233	0	0	0	22.433	0	0	RING finger domain-containing protein [Cordyceps militaris CM01]	6e-22	gi|573993437|ref|XP_006674639.1|	Up
TRINITY_DN3865_c1_g1	3.52532	0.221076	0.286953	0.66233	0	0	0	27.623	0	0	.	.	.
TRINITY_DN3784_c1_g1	3.52532	0.221076	0.286968	0.66233	0	0	0	31.103	0	0	.	.	.
TRINITY_DN1967_c1_g1	3.52532	0.221076	0.286976	0.66233	0	0	0	22.433	0	0	MFS transporter, putative [Cordyceps militaris CM01]	3e-43	gi|573981529|ref|XP_006668685.1|	Up
TRINITY_DN7892_c0_g1	3.52532	0.221076	0.286989	0.66233	0	0	0	34.658	0	0	.	.	.
TRINITY_DN8757_c0_g1	3.52531	0.221076	0.287001	0.66233	0	0	0	36.293	0	0	F-box domain-containing protein [Beauveria bassiana ARSEF 2860]	1e-17	gi|667657427|ref|XP_008600545.1|	Up
TRINITY_DN4699_c0_g2	3.52531	0.221076	0.287004	0.66233	0	0	0	7.694	0	0	.	.	.
TRINITY_DN3791_c2_g3	3.5253	0.221076	0.287043	0.66233	0	0	0	5.811	0	0	.	.	.
TRINITY_DN1751_c0_g1	3.5253	0.221076	0.287044	0.66233	0	0	0	19.461	0	0	.	.	.
TRINITY_DN11667_c0_g1	3.5253	0.221076	0.287045	0.66233	0	0	0	53.565	0	0	.	.	.
TRINITY_DN6971_c0_g1	3.5253	0.221076	0.287055	0.66233	0	0	0	38.52	0	0	.	.	.
TRINITY_DN10862_c0_g1	3.52529	0.221076	0.287084	0.66233	0	0	0	39.982	0	0	tyrosinase, putative [Cordyceps militaris CM01]	5e-15	gi|573989347|ref|XP_006672594.1|	Up
TRINITY_DN7683_c0_g1	3.52529	0.221076	0.287086	0.66233	0	0	0	36.723	0	0	.	.	.
TRINITY_DN2768_c0_g1	3.52529	0.221076	0.287112	0.66233	0	0	0	56.155	0	0	.	.	.
TRINITY_DN6480_c0_g1	3.52528	0.221076	0.28712	0.66233	0	0	0	17.042	0	0	hypothetical protein CGLO_05919 [Colletotrichum gloeosporioides Cg-14]	9e-66	gi|530473944|gb|EQB54270.1|	Up
TRINITY_DN7857_c0_g1	3.52528	0.221076	0.287152	0.66233	0	0	0	37.602	0	0	.	.	.
TRINITY_DN6822_c0_g1	3.52526	0.221076	0.287214	0.66233	0	0	0	23.752	0	0	.	.	.
TRINITY_DN7889_c0_g1	3.52525	0.221076	0.287275	0.66233	0	0	0	23.953	0	0	.	.	.
TRINITY_DN2839_c1_g1	3.52524	0.221076	0.287335	0.66233	0	0	0	35.461	0	0	.	.	.
TRINITY_DN11762_c0_g1	3.52522	0.221076	0.287395	0.66233	0	0	0	35.872	0	0	bacterioferritin comigratory protein, putative [Cordyceps militaris CM01]	2e-43	gi|573978944|ref|XP_006667417.1|	Up
TRINITY_DN11754_c0_g1	3.5252	0.221076	0.287509	0.66233	0	0	0	21.908	0	0	.	.	.
TRINITY_DN3047_c0_g1	3.52517	0.221076	0.287623	0.66233	0	0	0	28.149	0	0	.	.	.
TRINITY_DN6457_c0_g1	3.52514	0.221076	0.287736	0.66233	0	0	0	20.168	0	0	.	.	.
TRINITY_DN9742_c0_g1	3.52513	0.221076	0.287811	0.66233	0	0	0	43.204	0	0	hypothetical protein EPUS_06362 [Endocarpon pusillum Z07020]	2e-41	gi|629641454|ref|XP_007800225.1|	Up
TRINITY_DN9332_c0_g1	3.52511	0.221076	0.287882	0.66233	0	0	0	39.982	0	0	.	.	.
TRINITY_DN5111_c2_g1	3.52511	0.221076	0.287887	0.66233	0	0	0	50.42	0	0	.	.	.
TRINITY_DN4532_c0_g1	3.52511	0.221076	0.287894	0.66233	0	0	0	33.894	0	0	.	.	.
TRINITY_DN4863_c3_g1	3.52511	0.221076	0.287898	0.66233	0	0	0	38.52	0	0	.	.	.
TRINITY_DN10851_c0_g1	3.5251	0.221076	0.287906	0.66233	0	0	0	55.266	0	0	.	.	.
TRINITY_DN7067_c0_g1	3.5251	0.221076	0.287927	0.66233	0	0	0	28.149	0	0	.	.	.
TRINITY_DN4144_c2_g1	3.52279	4.64702	1.66413e-05	0.00055429	10.708	4.182	5.244	32.756	150.959	48.888	hypothetical protein CCM_01211 [Cordyceps militaris CM01]	0	gi|573976972|ref|XP_006666431.1|	Up
TRINITY_DN4975_c0_g2	3.51988	3.03401	0.000253751	0.00527251	1.671	5.124	2.409	49.397	17.565	37.613	cupin domain protein [Cordyceps militaris CM01]	6e-99	gi|573976330|ref|XP_006666110.1|	Up
TRINITY_DN11554_c0_g1	3.51974	0.974987	0.0493445	0.265319	0	0	1.935	2.17	2.526	28.541	ankyrin repeat protein [Cordyceps militaris CM01]	1e-94	gi|573978698|ref|XP_006667294.1|	Up
TRINITY_DN1686_c0_g1	3.51565	3.11241	0.000937414	0.0150705	0.633	0.375	1.751	22.969	5.991	4.268	hypothetical protein CCM_00682 [Cordyceps militaris CM01]	4e-26	gi|573975918|ref|XP_006665904.1|	Up
TRINITY_DN1565_c0_g1	3.514	4.27165	0.000122977	0.002893	2.739	5.124	4.025	13.382	23.88	98.974	efflux pump antibiotic resistance protein, putative [Cordyceps militaris CM01]	0	gi|573982687|ref|XP_006669264.1|	Up
TRINITY_DN847_c0_g1	3.5136	3.94362	0.0457264	0.252412	0	0	3.057	31.781	4.321	0	serine/threonine protein kinase, putative [Cordyceps militaris CM01]	0	gi|573989065|ref|XP_006672453.1|	Up
TRINITY_DN4583_c1_g1	3.5091	3.48623	2.33427e-05	0.000731847	4.986	2.923	6.87	48.413	54.71	71.78	hypothetical protein CCM_05566 [Cordyceps militaris CM01]	1e-96	gi|573985705|ref|XP_006670773.1|	Up
TRINITY_DN5846_c4_g2	3.50596	2.94604	0.00374461	0.0434186	2.455	0	3.406	58.248	6.179	11.012	.	.	.
TRINITY_DN3567_c0_g1	3.50523	4.1722	0.000258199	0.00532725	0	6.509	2.922	17.473	43.47	45.704	hypothetical protein CCM_00214 [Cordyceps militaris CM01]	2e-50	gi|573974984|ref|XP_006665437.1|	Up
TRINITY_DN3794_c1_g1	3.50167	0.993708	0.0173333	0.131219	4.013	0	0	33.043	9.675	19.765	hypothetical protein CCM_06224 [Cordyceps militaris CM01]	7e-15	gi|573987015|ref|XP_006671428.1|	Up
TRINITY_DN6165_c0_g1	3.4958	8.56788	2.52792e-11	3.45287e-09	25.034	27.939	21.383	259.212	148.642	421.207	Galactose oxidase/kelch, beta-propeller [Cordyceps militaris CM01]	0	gi|573976292|ref|XP_006666091.1|	Up
TRINITY_DN4479_c0_g1	3.49528	2.40118	0.0457155	0.252412	4.212	0	0	6.538	43.971	0	ATP/GTP-binding protein [Cordyceps militaris CM01]	8e-125	gi|573976268|ref|XP_006666079.1|	Up
TRINITY_DN11243_c0_g1	3.49447	1.49848	0.00783125	0.0755677	0	1.663	1.297	4.349	11.783	22.584	.	.	.
TRINITY_DN218_c0_g1	3.49185	2.18709	0.00163664	0.0233469	0.954	2.23	0.871	6.796	18.004	23.28	.	.	.
TRINITY_DN1212_c1_g1	3.48926	0.989993	0.0434251	0.245319	3.541	0	0	32.747	0	21.762	.	.	.
TRINITY_DN8771_c0_g1	3.48871	2.6141	0.000490812	0.00897106	2.474	0.961	1.509	8.392	19.454	31.211	.	.	.
TRINITY_DN5117_c0_g1	3.48805	6.70369	4.90866e-10	5.58004e-08	2.682	4.221	4.596	62.502	20.028	45.533	Armadillo-type fold domain containing protein [Cordyceps militaris CM01]	0	gi|573978586|ref|XP_006667238.1|	Up
TRINITY_DN218_c1_g1	3.48152	3.66731	0.00034706	0.00672	5.968	1.75	2.748	9.128	54.668	55.678	hypothetical protein CCM_09235 [Cordyceps militaris CM01]	5e-30	gi|573993023|ref|XP_006674432.1|	Up
TRINITY_DN5234_c0_g1	3.48119	5.91469	1.38638e-05	0.000474332	5.241	3.846	5.205	5.506	57.518	95.208	Fungal specific transcription factor [Cordyceps militaris CM01]	0	gi|573979602|ref|XP_006667746.1|	Up
TRINITY_DN7336_c0_g1	3.47425	0.970309	0.027789	0.182362	1.284	0	0	2.629	3.058	14.185	hypothetical protein CCM_04956 [Cordyceps militaris CM01]	8e-133	gi|573984487|ref|XP_006670164.1|	Up
TRINITY_DN4189_c2_g1	3.46284	1.47971	0.079362	0.349912	0.85	0	0.774	21.602	0	0	.	.	.
TRINITY_DN4334_c2_g1	3.45912	0.984945	0.0503623	0.268684	0	2.98	0	0	12.107	27.97	Fungal transcriptional regulatory protein [Cordyceps militaris CM01]	2e-12	gi|573985145|ref|XP_006670493.1|	Up
TRINITY_DN7508_c0_g1	3.45911	1.02212	0.0745067	0.338584	0	2.221	0	27.098	2.254	0	hypothetical protein CCM_03772 [Cordyceps militaris CM01]	2e-69	gi|573982125|ref|XP_006668983.1|	Up
TRINITY_DN5791_c0_g1	3.45856	7.08859	1.02217e-11	1.51349e-09	8.555	6.557	8.127	107.015	49.847	94.786	hypothetical protein BBAD15_g10716 [Beauveria bassiana D1-5]	5e-177	gi|701768769|gb|KGQ04033.1|	Up
TRINITY_DN710_c0_g1	3.45855	0.959077	0.0132118	0.108318	0	0	1.519	5.085	9.842	10.145	Methyltransferase type 11 [Cordyceps militaris CM01]	1e-22	gi|573979610|ref|XP_006667750.1|	Up
TRINITY_DN4334_c0_g1	3.4519	0.981165	0.0390707	0.228485	0	2.163	0	1.883	4.383	22.584	hypothetical protein VHEMI00078 [Torrubiella hemipterigena]	2e-13	gi|729188520|emb|CEJ79863.1|	Up
TRINITY_DN5091_c1_g1	3.44681	2.15422	0.00175782	0.0245233	0.689	1.625	0.639	5.649	17.169	11.001	hypothetical protein BBA_08781 [Beauveria bassiana ARSEF 2860]	2e-133	gi|667660537|ref|XP_008602100.1|	Up
TRINITY_DN4403_c0_g2	3.44635	5.11473	0.00166477	0.0235608	0	11.787	3.135	13.831	28.441	117.974	MATE efflux family protein subfamily, putative [Cordyceps militaris CM01]	0	gi|573993017|ref|XP_006674429.1|	Up
TRINITY_DN282_c0_g1	3.44536	0.950072	0.0251208	0.169911	0	0	6.008	27.365	64.542	8.194	.	.	.
TRINITY_DN3668_c1_g1	3.44511	7.41819	5.77714e-08	4.07173e-06	41.389	48.465	53.002	152.847	439.07	950.71	hypothetical protein CCM_01715 [Cordyceps militaris CM01]	1e-92	gi|573977976|ref|XP_006666933.1|	Up
TRINITY_DN6122_c0_g2	3.44211	4.11409	0.000542701	0.00967853	0.935	0	2.612	15.628	18.39	4.884	MFS monocarboxylate transporter [Cordyceps militaris CM01]	0	gi|573985981|ref|XP_006670911.1|	Up
TRINITY_DN6620_c0_g1	3.43733	6.57445	5.77266e-05	0.00156725	15.203	12.373	11.253	7.742	189.628	218.854	phytase, putative [Cordyceps militaris CM01]	0	gi|573984707|ref|XP_006670274.1|	Up
TRINITY_DN11250_c0_g1	3.43664	5.56906	7.47745e-07	3.84118e-05	17.347	12.373	13.865	53.068	310.143	107.008	hypothetical protein CCM_08104 [Cordyceps militaris CM01]	1e-134	gi|573990771|ref|XP_006673306.1|	Up
TRINITY_DN9655_c0_g1	3.43655	3.05867	0.000494046	0.00900997	1.048	1.663	3.928	37.134	9.873	24.353	C6 zinc finger domain protein [Cordyceps militaris CM01]	7e-42	gi|573984591|ref|XP_006670216.1|	Up
TRINITY_DN349_c1_g1	3.43328	0.953734	0.0232958	0.161539	3.768	0	0	19.346	4.53	32.398	Transcription factor, fungi [Penicillium italicum]	2e-22	gi|700480811|gb|KGO67592.1|	Up
TRINITY_DN5763_c1_g1	3.43269	6.81288	8.28036e-13	1.48878e-10	17.526	20.065	14.852	150.897	226.115	176.676	Fungal transcriptional regulatory protein [Cordyceps militaris CM01]	0	gi|573985685|ref|XP_006670763.1|	Up
TRINITY_DN5343_c0_g1	3.43243	6.91922	2.7853e-07	1.64688e-05	9.811	9.268	9.201	74.058	27.125	199.808	oligopeptide transporter [Cordyceps militaris CM01]	0	gi|573977110|ref|XP_006666500.1|	Up
TRINITY_DN9434_c0_g1	3.42888	2.15755	0.00204345	0.0273183	1.313	1.538	0	16.727	6.972	8.022	copper amine oxidase [Cordyceps militaris CM01]	1e-141	gi|573988385|ref|XP_006672113.1|	Up
TRINITY_DN2505_c0_g1	3.4268	6.57146	1.04497e-10	1.29665e-08	26.866	31.823	27.353	468.882	265.943	180.225	period circadian protein, putative [Cordyceps militaris CM01]	4e-27	gi|573976370|ref|XP_006666130.1|	Up
TRINITY_DN2604_c1_g1	3.42622	2.34291	0.00176602	0.0245987	2.833	0	1.742	25.091	5.594	23.143	ABC transporter, putative [Cordyceps militaris CM01]	0	gi|573978204|ref|XP_006667047.1|	Up
TRINITY_DN536_c0_g1	3.42594	1.47131	0.00915541	0.0845041	1.653	1.932	0	16.861	3.914	22.219	.	.	.
TRINITY_DN10700_c0_g1	3.42518	2.88777	0.0115833	0.0996572	4.174	0	3.831	80.873	3.705	6.379	hypothetical protein CCM_06430 [Cordyceps militaris CM01]	9e-45	gi|573987427|ref|XP_006671634.1|	Up
TRINITY_DN8448_c1_g1	3.42391	3.21061	0.000104083	0.00252609	0.491	2.317	2.274	24.211	14.601	16.946	amidohydrolase, putative [Cordyceps militaris CM01]	0	gi|573981849|ref|XP_006668845.1|	Up
TRINITY_DN4097_c1_g1	3.42378	3.09293	0.00046117	0.00852656	1.445	2.25	0.88	6.853	15.864	27	.	.	.
TRINITY_DN4057_c0_g2	3.42014	3.16437	0.00140235	0.020712	11.568	0	4.547	75.272	19.11	85.759	.	.	.
TRINITY_DN4860_c0_g1	3.41918	3.41041	0.00492596	0.0537753	4.325	0	0	15.14	8.652	23.953	.	.	.
TRINITY_DN1741_c0_g2	3.41592	2.18671	0.00335206	0.0401398	0	1.827	0	6.165	6.544	5.386	phospholipase D [Cordyceps militaris CM01]	0	gi|573983225|ref|XP_006669533.1|	Up
TRINITY_DN6069_c0_g2	3.41223	3.96488	0.000632193	0.0109638	0	2.663	3.27	40.938	10.176	15.235	hypothetical protein CCM_03466 [Cordyceps militaris CM01]	3e-149	gi|573981519|ref|XP_006668680.1|	Up
TRINITY_DN5621_c0_g1	3.41111	1.81588	0.0388107	0.22758	1.823	0	0	15.408	0	7.943	hypothetical protein CCM_03434 [Cordyceps militaris CM01]	3e-117	gi|573981455|ref|XP_006668648.1|	Up
TRINITY_DN2297_c0_g2	3.41	7.15573	2.20982e-06	9.66178e-05	6.818	5.913	6.995	10.304	118.26	78.775	bacteriodes thetaiotaomicron symbiotic chitinase [Cordyceps militaris CM01]	0	gi|573975192|ref|XP_006665541.1|	Up
TRINITY_DN8548_c0_g1	3.40695	2.74723	0.00530087	0.0571262	3.211	2.509	1.964	20.761	2.536	61.566	hypothetical protein CCM_04005 [Cordyceps militaris CM01]	1e-41	gi|573982591|ref|XP_006669216.1|	Up
TRINITY_DN4863_c1_g1	3.40546	4.01119	0.000195876	0.00425566	1.162	2.269	3.919	41.454	5.939	31.736	.	.	.
TRINITY_DN10773_c0_g1	3.4025	0.961151	0.121803	0.435458	1.624	0	0	23.236	0	0	.	.	.
TRINITY_DN848_c0_g1	3.40221	3.16348	0.000157686	0.00352591	1.048	1.221	2.883	27.174	12.336	17.255	asparaginyl-tRNA synthetase [Cordyceps militaris CM01]	0	gi|573992103|ref|XP_006673972.1|	Up
TRINITY_DN5960_c0_g1	3.39698	1.79042	0.00282757	0.035442	4.514	0	1.238	22.883	20.769	30.469	pfs domain-containing protein, partial [Metarhizium majus ARSEF 297]	8e-49	gi|743667002|gb|KID94052.1|	Up
TRINITY_DN1075_c0_g1	3.39477	7.87325	0.000431398	0.00808641	38.471	41.927	32.258	1076.92	54.23	45.168	sterol 24-c-methyltransferase, putative [Cordyceps militaris CM01]	0	gi|573983947|ref|XP_006669894.1|	Up
TRINITY_DN5607_c0_g1	3.39025	6.55087	4.10919e-13	7.95648e-11	4.042	4.413	3.754	41.98	41.247	43.182	NFX1-type zinc finger-containing protein 1 [Beauveria bassiana D1-5]	0	gi|701772037|gb|KGQ06692.1|	Up
TRINITY_DN7565_c0_g1	3.3889	6.53524	5.45811e-07	2.95006e-05	26.8	29.131	19.351	61.775	479.774	238.676	hypothetical protein CCM_09556 [Cordyceps militaris CM01]	4e-118	gi|573993663|ref|XP_006674752.1|	Up
TRINITY_DN1137_c0_g2	3.38676	2.66941	0.0126806	0.105359	0	3.644	0	29.401	3.622	5.58	hypothetical protein CCM_05759 [Cordyceps militaris CM01]	0	gi|573986091|ref|XP_006670966.1|	Up
TRINITY_DN4793_c0_g1	3.38428	4.46045	0.00548037	0.058666	3.928	0	0	13.047	9.571	18.122	onanonoxo-7-onima-8-eninoihtemlysoneda [Cordyceps militaris CM01]	0	gi|573991769|ref|XP_006673805.1|	Up
TRINITY_DN3921_c1_g1	3.38311	2.33539	0.00131141	0.0195284	2.021	0.788	0.619	13.018	17.461	7.395	DEAD/DEAH box helicase, putative [Cordyceps militaris CM01]	0	gi|573988075|ref|XP_006671958.1|	Up
TRINITY_DN5672_c0_g2	3.38276	2.58469	0.0375733	0.223286	0	1.019	0.803	19.279	0	1.552	hypothetical protein CCM_09133 [Cordyceps militaris CM01]	0	gi|573992819|ref|XP_006674330.1|	Up
TRINITY_DN3174_c0_g2	3.38193	2.31914	0.0256207	0.172296	1.813	0	0	4.741	13.526	0.605	vacuolar segregation protein (Pep7), putative [Cordyceps militaris CM01]	0	gi|573983877|ref|XP_006669859.1|	Up
TRINITY_DN6061_c3_g1	3.3815	1.83991	0.0551071	0.283167	1.473	0.865	0	25.607	0.877	0	hypothetical protein CCM_00795 [Cordyceps militaris CM01]	2e-23	gi|573976144|ref|XP_006666017.1|	Up
TRINITY_DN6133_c3_g1	3.37789	3.285	8.33138e-05	0.00211526	8.877	7.816	8.118	109.06	50.264	106.095	long-chain fatty acid transporter, putative [Cordyceps militaris CM01]	2e-45	gi|573991975|ref|XP_006673908.1|	Up
TRINITY_DN8188_c0_g1	3.37722	0.922078	0.0388288	0.227599	0	0	1.345	14.959	1.733	3.583	.	.	.
TRINITY_DN9257_c0_g1	3.37489	8.66444	5.42227e-07	2.9397e-05	54.723	45.456	48.532	916.564	99.192	513.06	Protein kinase-like domain [Cordyceps militaris CM01]	0	gi|573992219|ref|XP_006674030.1|	Up
TRINITY_DN4730_c0_g1	3.37148	3.85599	0.000199515	0.00431873	0	2.336	2.69	23.332	16.605	14.596	cytochrome b561, putative [Cordyceps militaris CM01]	2e-104	gi|573992963|ref|XP_006674402.1|	Up
TRINITY_DN7339_c0_g1	3.37072	4.55288	0.00022594	0.00479697	3.758	4.846	2.419	13.41	11.971	88.27	D-lactate dehydrogenase [Cordyceps militaris CM01]	0	gi|573981109|ref|XP_006668475.1|	Up
TRINITY_DN6016_c0_g3	3.3654	5.35868	9.34595e-08	6.33368e-06	4.542	5.903	2.787	22.863	67.454	44.38	Killer toxin subunits alpha/beta [Beauveria bassiana D1-5]	0	gi|701769172|gb|KGQ04359.1|	Up
TRINITY_DN3087_c0_g1	3.36405	5.47151	0.000191608	0.00417322	7.045	7.807	6.134	4.148	133.655	76.527	cytochrome P450 3A3 [Cordyceps militaris CM01]	0	gi|573991767|ref|XP_006673804.1|	Up
TRINITY_DN6083_c3_g1	3.36136	0.916189	0.0500089	0.267829	0	0	2.67	32.976	3.496	3.583	hypothetical protein CCM_02541 [Cordyceps militaris CM01]	2e-32	gi|573979622|ref|XP_006667756.1|	Up
TRINITY_DN420_c0_g1	3.3604	1.79854	0.0047982	0.052512	1.86	1.096	0	18.065	5.511	9.118	.	.	.
TRINITY_DN3002_c0_g1	3.3586	0.910786	0.0320828	0.202109	1.52	0	0	1.558	12.629	7.44	Cytochrome P450 oxidoreductase, putative [Cordyceps militaris CM01]	1e-114	gi|573990633|ref|XP_006673237.1|	Up
TRINITY_DN5029_c0_g2	3.35445	6.51316	1.39202e-11	1.9941e-09	6.554	5.624	5.099	49.388	46.475	79.209	non-ribosomal peptide synthase, putative [Cordyceps militaris CM01]	0	gi|573975798|ref|XP_006665844.1|	Up
TRINITY_DN9168_c0_g2	3.35362	7.26294	3.86996e-07	2.17783e-05	11.624	3.721	13.052	31.055	114.576	141.391	Glycoside hydrolase [Cordyceps militaris CM01]	0	gi|573992797|ref|XP_006674319.1|	Up
TRINITY_DN1412_c0_g1	3.35349	1.44684	0.0852218	0.357928	0	1.144	0.89	23.867	0	0	.	.	.
TRINITY_DN8247_c0_g1	3.35137	1.377	0.0256985	0.172498	1.624	0	1.48	1.654	7.692	29.762	.	.	.
TRINITY_DN694_c0_g2	3.34958	2.8167	0.00404097	0.0462951	2.465	0.01	1.287	3.212	9.727	28.461	.	.	.
TRINITY_DN2428_c0_g2	3.34958	4.60531	1.82563e-06	8.22701e-05	1.908	3.461	3.261	18.209	44.795	25.174	FAD dependent oxidoreductase [Cordyceps militaris CM01]	0	gi|573987635|ref|XP_006671738.1|	Up
TRINITY_DN5748_c1_g1	3.34499	0.896874	0.0301341	0.192797	0	0	2.99	13.458	3.924	28.176	.	.	.
TRINITY_DN11359_c0_g1	3.34498	0.925074	0.0576968	0.289387	0	2.144	0	0	8.694	17.916	.	.	.
TRINITY_DN9388_c0_g2	3.34214	1.4043	0.0258122	0.172998	0	1.673	0.871	2.781	21.375	1.335	WD repeat protein [Cordyceps militaris CM01]	6e-138	gi|573977442|ref|XP_006666666.1|	Up
TRINITY_DN4532_c2_g1	3.34139	0.918435	0.0501783	0.26841	1.624	0	0	18.304	1.931	1.997	C2H2 transcription factor (Ace1) [Cordyceps militaris CM01]	4e-16	gi|573986767|ref|XP_006671304.1|	Up
TRINITY_DN4003_c0_g1	3.34073	4.6838	5.39026e-05	0.00148169	3.437	4.461	4.557	8.373	44.388	71.997	cytochrome P450, putative [Cordyceps militaris CM01]	0	gi|573991883|ref|XP_006673862.1|	Up
TRINITY_DN1130_c1_g1	3.33984	2.0091	0.00714518	0.0708015	0	0	2.516	12.56	2.421	14.219	.	.	.
TRINITY_DN6301_c0_g1	3.33848	1.74959	0.0140272	0.113428	2.238	0	0	2.284	14.987	8.216	glutamate carboxypeptidase [Cordyceps militaris CM01]	0	gi|573990407|ref|XP_006673124.1|	Up
TRINITY_DN6112_c0_g2	3.33535	7.27774	2.64793e-09	2.62499e-07	8.763	8.71	21.334	143.384	76.878	169.612	Protein kinase domain-containing protein [Cordyceps militaris CM01]	2e-148	gi|573979632|ref|XP_006667761.1|	Up
TRINITY_DN4922_c1_g1	3.3326	0.901977	0.0171687	0.13027	4.136	0	0	12.779	19.955	25.482	.	.	.
TRINITY_DN5330_c0_g1	3.33215	0.936263	0.05363	0.278928	0	5.105	0	36.981	0	31.439	hypothetical protein CCM_07284 [Cordyceps militaris CM01]	4e-47	gi|573989129|ref|XP_006672485.1|	Up
TRINITY_DN8379_c0_g1	3.33167	6.33605	1.35082e-12	2.35659e-10	10.246	10.114	13.546	114.719	121.433	103.242	MFS multidrug transporter, putative [Cordyceps militaris CM01]	0	gi|573986671|ref|XP_006671256.1|	Up
TRINITY_DN8306_c0_g1	3.32739	4.43665	6.67545e-05	0.00176433	8.112	3.798	2.98	20.952	98.305	30.424	hypothetical protein CCM_08848 [Cordyceps militaris CM01]	5e-162	gi|573992253|ref|XP_006674047.1|	Up
TRINITY_DN8534_c0_g1	3.32671	3.34839	0.000297402	0.00600872	1.228	0.856	0.9	3.986	8.944	17.654	dynamin GTPase, putative [Cordyceps militaris CM01]	0	gi|573990635|ref|XP_006673238.1|	Up
TRINITY_DN6008_c0_g1	3.32143	1.40679	0.111677	0.415928	1.832	0	0	19.747	0	0	RNA binding protein Jsn1, putative [Cordyceps militaris CM01]	6e-26	gi|573979800|ref|XP_006667845.1|	Up
TRINITY_DN4672_c2_g1	3.31877	1.37537	0.00593792	0.0620558	2.484	0	2.274	25.454	17.795	15.235	.	.	.
TRINITY_DN5379_c1_g1	3.31856	2.97367	0.000437057	0.00816643	2.455	1.433	1.693	8.746	16.636	32.227	hypothetical protein S40288_10266 [Stachybotrys chartarum IBT 40288]	7e-26	gi|667741532|gb|KFA80281.1|	Up
TRINITY_DN3867_c0_g1	3.31823	2.11656	0.0099927	0.090016	0	3.625	0	4.607	23.045	12.199	.	.	.
TRINITY_DN4973_c2_g1	3.31405	1.36431	0.00983722	0.0888881	1.539	0	1.413	4.731	12.817	18.886	Protein kinase-like domain [Cordyceps militaris CM01]	2e-127	gi|573981427|ref|XP_006668634.1|	Up
TRINITY_DN344_c0_g1	3.31043	0.152558	0.398145	0.763281	0	0	0	0	0	11.48	.	.	.
TRINITY_DN8869_c0_g1	3.31043	0.152558	0.398134	0.763281	0	0	0	0	0	23.896	MFS transporter, putative [Cordyceps militaris CM01]	9e-45	gi|573981919|ref|XP_006668880.1|	Up
TRINITY_DN753_c0_g3	3.31042	0.152558	0.398081	0.763281	0	0	0	0	0	3.321	.	.	.
TRINITY_DN8648_c0_g1	3.31042	0.152558	0.398079	0.763281	0	0	0	0	0	32.261	.	.	.
TRINITY_DN5590_c0_g1	3.31042	0.152558	0.398071	0.763281	0	0	0	0	0	5.421	ABC bile acid transporter, putative [Cordyceps militaris CM01]	8e-96	gi|573990421|ref|XP_006673131.1|	Up
TRINITY_DN4464_c1_g1	3.31042	0.152558	0.398069	0.763281	0	0	0	0	0	16.045	.	.	.
TRINITY_DN305_c0_g2	3.31042	0.152558	0.398061	0.763281	0	0	0	0	0	6.117	.	.	.
TRINITY_DN4537_c2_g1	3.31041	0.152558	0.398011	0.763281	0	0	0	0	0	25.037	.	.	.
TRINITY_DN5370_c1_g1	3.31041	0.152558	0.398009	0.763281	0	0	0	0	0	23.679	.	.	.
TRINITY_DN3605_c0_g1	3.31041	0.152558	0.397998	0.763281	0	0	0	0	0	31.519	.	.	.
TRINITY_DN10803_c0_g1	3.3104	0.152558	0.397974	0.763281	0	0	0	0	0	39.987	protease S8 tripeptidyl peptidase I, putative [Cordyceps militaris CM01]	2e-40	gi|573989203|ref|XP_006672522.1|	Up
TRINITY_DN9881_c0_g1	3.3104	0.152558	0.397956	0.763281	0	0	0	0	0	38.4	hypothetical protein CCM_02059 [Cordyceps militaris CM01]	1e-40	gi|573978662|ref|XP_006667276.1|	Up
TRINITY_DN3735_c1_g1	3.3104	0.152558	0.397945	0.763281	0	0	0	0	0	20.29	.	.	.
TRINITY_DN7028_c0_g1	3.31038	0.152558	0.397877	0.763281	0	0	0	0	0	52.448	eukaryotic translation initiation factor 2C 2 [Cordyceps militaris CM01]	4e-40	gi|573977150|ref|XP_006666520.1|	Up
TRINITY_DN7276_c0_g1	3.30716	5.89183	6.43604e-06	0.000244931	18.395	30.784	20.115	63.438	125.326	491.799	.	.	.
TRINITY_DN4125_c0_g1	3.30522	0.881667	0.0248673	0.168653	0	0	3.938	26.725	20.884	10.659	.	.	.
TRINITY_DN3853_c0_g1	3.30465	2.4165	0.00434711	0.0487874	0	0	2.816	6.461	10.687	14.858	Fructosamine/Ketosamine-3-kinase [Cordyceps militaris CM01]	0	gi|573986857|ref|XP_006671349.1|	Up
TRINITY_DN4676_c0_g1	3.29696	5.74779	7.38692e-07	3.80577e-05	9.849	13.258	12.23	68.179	229.351	46.948	hypothetical protein CCM_02615 [Cordyceps militaris CM01]	0	gi|573979770|ref|XP_006667830.1|	Up
TRINITY_DN5572_c0_g1	3.2962	6.23412	0.0239872	0.164393	0	0	26.172	11.776	158.265	85.485	Cutinase palindrome-binding protein [Cordyceps militaris CM01]	0	gi|573974700|ref|XP_006665295.1|	Up
TRINITY_DN4699_c1_g1	3.2959	1.72027	0.0538319	0.27914	0.746	0	1.374	21.707	0	1.518	metal ion resistance protein/transporter (Zrc1), putative [Cordyceps militaris CM01]	5e-25	gi|573991995|ref|XP_006673918.1|	Up
TRINITY_DN6872_c0_g1	3.29247	0.924493	0.0669464	0.31615	0	5.701	0	54.664	0	11.891	C6 zinc finger domain-containing protein [Cordyceps militaris CM01]	6e-27	gi|573991091|ref|XP_006673466.1|	Up
TRINITY_DN11286_c0_g1	3.29213	2.44577	0.048151	0.260627	1.983	0	1.829	39.122	0	0.81	.	.	.
TRINITY_DN11239_c0_g1	3.28969	2.6393	0.000671166	0.0114815	4.146	1.211	1.906	12.684	36.78	25.345	hypothetical protein BBA_04268 [Beauveria bassiana ARSEF 2860]	1e-63	gi|667651511|ref|XP_008597587.1|	Up
TRINITY_DN1934_c0_g2	3.28541	1.36593	0.0184264	0.136859	1.728	0	0	11.47	2.547	5.911	hypothetical protein CCM_07018 [Cordyceps militaris CM01]	7e-38	gi|573988597|ref|XP_006672219.1|	Up
TRINITY_DN10678_c0_g1	3.28485	0.898276	0.0276829	0.181733	0	2.23	0	9.74	2.265	13.991	hypothetical protein BBAD15_g9008 [Beauveria bassiana D1-5]	2e-45	gi|701770861|gb|KGQ05757.1|	Up
TRINITY_DN9559_c0_g1	3.28436	1.36624	0.0111961	0.0974195	0	1.548	1.209	5.391	6.262	19.389	hypothetical protein CCM_07284 [Cordyceps militaris CM01]	5e-11	gi|573989129|ref|XP_006672485.1|	Up
TRINITY_DN5218_c1_g1	3.28365	0.148567	0.396633	0.762758	0	0	0	0	53.938	0	hypothetical protein CCM_04698 [Cordyceps militaris CM01]	2e-14	gi|573983975|ref|XP_006669908.1|	Up
TRINITY_DN2315_c0_g1	3.28364	0.148567	0.39655	0.762758	0	0	0	0	25.664	0	.	.	.
TRINITY_DN10839_c0_g1	3.28363	0.148567	0.396472	0.762758	0	0	0	0	20.79	0	.	.	.
TRINITY_DN5218_c0_g1	3.28363	0.148567	0.396468	0.762758	0	0	0	0	21.886	0	hypothetical protein CCM_04698 [Cordyceps militaris CM01]	1e-52	gi|573983975|ref|XP_006669908.1|	Up
TRINITY_DN8038_c0_g1	3.28363	0.148567	0.396436	0.762758	0	0	0	0	54.877	0	.	.	.
TRINITY_DN9478_c0_g1	3.28363	0.148567	0.396422	0.762758	0	0	0	0	32.657	0	.	.	.
TRINITY_DN11664_c0_g1	3.28363	0.148567	0.396415	0.762758	0	0	0	0	26.458	0	hypothetical protein H113_05277 [Trichophyton rubrum MR1459]	2e-27	gi|607963610|gb|EZF94075.1|	Up
TRINITY_DN1933_c0_g1	3.28362	0.148567	0.396315	0.762758	0	0	0	0	11.846	0	polyketide synthase, putative [Cordyceps militaris CM01]	5e-72	gi|573992639|ref|XP_006674240.1|	Up
TRINITY_DN1890_c1_g1	3.28361	0.148567	0.39628	0.762758	0	0	0	0	35.621	0	Dual oxidase 2 [Beauveria bassiana D1-5]	4e-37	gi|701766937|gb|KGQ02670.1|	Up
TRINITY_DN1867_c0_g1	3.2836	0.148567	0.396209	0.762758	0	0	0	0	39.086	0	.	.	.
TRINITY_DN9067_c0_g1	3.2836	0.148567	0.39619	0.762758	0	0	0	0	40.192	0	hypothetical protein CCM_08583 [Cordyceps militaris CM01]	2e-41	gi|573991725|ref|XP_006673783.1|	Up
TRINITY_DN8804_c0_g1	3.2836	0.148567	0.39617	0.762758	0	0	0	0	55.848	0	.	.	.
TRINITY_DN7588_c0_g1	3.2836	0.148567	0.396151	0.762758	0	0	0	0	2.63	0	Protein kinase-like domain [Cordyceps militaris CM01]	0	gi|573991255|ref|XP_006673548.1|	Up
TRINITY_DN6127_c0_g2	3.2836	0.148567	0.396136	0.762758	0	0	0	0	9.226	0	hypothetical protein CCM_05010 [Cordyceps militaris CM01]	6e-20	gi|573984595|ref|XP_006670218.1|	Up
TRINITY_DN7282_c1_g1	3.28127	0.894021	0.0250686	0.169692	0	4.413	0	19.241	22.502	9.209	hypothetical protein FOMG_12583 [Fusarium oxysporum f. sp. melonis 26406]	3e-26	gi|590030536|gb|EXK32394.1|
TRINITY_DN10869_c0_g1	3.27787	0.151227	0.305361	0.672053	0	0	0	0	9.592	19.446	.	.	.
TRINITY_DN6851_c0_g1	3.27785	0.151227	0.305319	0.672044	0	0	0	0	12.347	24.935	.	.	.
TRINITY_DN2165_c0_g1	3.27785	0.151227	0.305301	0.672044	0	0	0	0	12.19	24.615	cytochrome P450, putative [Cordyceps militaris CM01]	8e-44	gi|573978432|ref|XP_006667161.1|	Up
TRINITY_DN9820_c0_g1	3.27782	0.151227	0.305242	0.672044	0	0	0	0	11.021	22.287	.	.	.
TRINITY_DN4242_c1_g1	3.2778	0.151227	0.305189	0.672044	0	0	0	0	5.083	10.385	trypsin-related protease [Cordyceps militaris CM01]	9e-48	gi|573993153|ref|XP_006674497.1|	Up
TRINITY_DN4928_c1_g1	3.27779	0.151227	0.305146	0.672044	0	0	0	0	7.629	15.497	.	.	.
TRINITY_DN8753_c0_g1	3.27778	0.151227	0.30513	0.672044	0	0	0	0	11.428	23.109	.	.	.
TRINITY_DN7959_c0_g1	3.27778	0.151227	0.305121	0.672044	0	0	0	0	7.995	16.227	Glycoside hydrolase, family 36 [Beauveria bassiana ARSEF 2860]	1e-34	gi|667661339|ref|XP_008602501.1|	Up
TRINITY_DN5315_c3_g1	3.27777	0.151227	0.305111	0.672044	0	0	0	0	11.293	22.835	pfs domain-containing protein [Cordyceps militaris CM01]	1e-14	gi|573981923|ref|XP_006668882.1|	Up
TRINITY_DN10808_c0_g1	3.27777	0.151227	0.305102	0.672044	0	0	0	0	15.52	31.268	.	.	.
TRINITY_DN11405_c0_g1	3.27776	0.151227	0.305086	0.672044	0	0	0	0	18.619	37.419	hypothetical protein CCM_07668 [Cordyceps militaris CM01]	2e-20	gi|573989901|ref|XP_006672871.1|	Up
TRINITY_DN10870_c0_g1	3.27775	0.151227	0.305044	0.672044	0	0	0	0	11.877	23.999	.	.	.
TRINITY_DN2162_c0_g1	3.27773	0.151227	0.305003	0.672044	0	0	0	0	13.401	27.034	.	.	.
TRINITY_DN5374_c1_g1	3.27679	1.96662	0.00589723	0.0618507	0.963	0	2.661	2.963	21.74	15.383	.	.	.
TRINITY_DN8807_c0_g1	3.27466	0.891208	0.0257161	0.17255	0	2.288	0	11.967	4.644	9.552	.	.	.
TRINITY_DN3690_c0_g1	3.27435	1.35167	0.0167981	0.128756	4.136	0	0	10.591	29.568	7.612	.	.	.
TRINITY_DN6336_c0_g1	3.27399	3.20558	0.000158903	0.00354413	0.737	1.731	1.703	18.103	14.403	8.604	.	.	.
TRINITY_DN5781_c0_g1	3.27318	1.74704	0.0361225	0.217451	0	1.163	0.319	4.072	0	13.169	efflux protein [Cordyceps militaris CM01]	0	gi|573982307|ref|XP_006669074.1|	Up
TRINITY_DN7878_c0_g1	3.27257	0.149897	0.304082	0.672044	0	0	0	0	21.771	11.012	.	.	.
TRINITY_DN4685_c2_g1	3.27257	0.149897	0.304078	0.672044	0	0	0	0	32.553	16.387	hypothetical protein BBAD15_g8421 [Beauveria bassiana D1-5]	1e-11	gi|701771517|gb|KGQ06284.1|	Up
TRINITY_DN9886_c0_g1	3.27257	0.149897	0.304065	0.672044	0	0	0	0	31.05	15.634	.	.	.
TRINITY_DN10403_c0_g1	3.27256	0.149897	0.304052	0.672044	0	0	0	0	12.107	6.162	.	.	.
TRINITY_DN8061_c0_g1	3.27256	0.149897	0.304047	0.672044	0	0	0	0	29.213	14.721	.	.	.
TRINITY_DN9827_c0_g1	3.27256	0.149897	0.304026	0.672044	0	0	0	0	36.592	18.384	.	.	.
TRINITY_DN10384_c0_g1	3.27256	0.149897	0.304023	0.672044	0	0	0	0	12.284	6.254	.	.	.
TRINITY_DN10635_c0_g1	3.27253	0.149897	0.303942	0.672044	0	0	0	0	28.785	14.504	.	.	.
TRINITY_DN8915_c0_g1	3.27252	0.149897	0.303911	0.672044	0	0	0	0	27.178	13.705	.	.	.
TRINITY_DN7591_c0_g1	3.27251	0.149897	0.303883	0.672044	0	0	0	0	17.106	8.673	Protein kinase-like domain [Cordyceps militaris CM01]	1e-49	gi|573992641|ref|XP_006674241.1|	Up
TRINITY_DN9022_c0_g1	3.2725	0.149897	0.303872	0.672044	0	0	0	0	33.628	16.912	.	.	.
TRINITY_DN7383_c0_g1	3.27249	0.149897	0.303825	0.672044	0	0	0	0	14.852	7.543	.	.	.
TRINITY_DN6087_c0_g2	3.27209	6.85115	3.82322e-05	0.00111347	2.115	8.47	4.102	100.161	8.517	32.558	solute carrier family 12 protein [Cordyceps militaris CM01]	0	gi|573990079|ref|XP_006672960.1|	Up
TRINITY_DN457_c0_g1	3.27043	4.3441	0.00262502	0.0334681	4.788	3.567	3.203	98.355	10.259	3.184	hypothetical protein CCM_03327 [Cordyceps militaris CM01]	4e-110	gi|573981241|ref|XP_006668541.1|	Up
TRINITY_DN5897_c0_g2	3.26917	3.93756	0.00247499	0.0318549	0	3.24	2.825	42.716	7.734	8.228	hypothetical protein CCM_06432 [Cordyceps militaris CM01]	0	gi|573987431|ref|XP_006671636.1|	Up
TRINITY_DN2299_c0_g1	3.25823	7.12892	2.69359e-08	2.10005e-06	15.685	13.498	15.5	49.311	222.744	150.772	Zn(II)2Cys6 transcription factor [Cordyceps militaris CM01]	0	gi|573980611|ref|XP_006668226.1|	Up
TRINITY_DN6079_c0_g1	3.25584	2.4359	0.00853746	0.0804216	2.578	0	0	13.936	2.557	9.437	hypothetical protein CCM_00133 [Cordyceps militaris CM01]	2e-93	gi|573974822|ref|XP_006665356.1|	Up
TRINITY_DN11576_c0_g1	3.2547	0.144902	0.307781	0.672424	0	0	0	11.403	0	27.411	sarcosine oxidase [Cordyceps militaris CM01]	3e-30	gi|573984523|ref|XP_006670182.1|	Up
TRINITY_DN558_c0_g1	3.2547	0.144902	0.307742	0.672424	0	0	0	6.041	0	14.459	.	.	.
TRINITY_DN10800_c0_g1	3.2547	0.144902	0.307708	0.672424	0	0	0	14.987	0	36.152	.	.	.
TRINITY_DN8328_c0_g1	3.25469	0.144902	0.307698	0.672424	0	0	0	13.601	0	32.763	.	.	.
TRINITY_DN9611_c0_g1	3.25469	0.144902	0.307693	0.672424	0	0	0	13.19	0	31.759	.	.	.
TRINITY_DN8093_c0_g1	3.25469	0.144902	0.307688	0.672424	0	0	0	11.403	0	27.411	.	.	.
TRINITY_DN7725_c0_g1	3.25469	0.144902	0.307654	0.672424	0	0	0	12.607	0	30.332	.	.	.
TRINITY_DN7127_c0_g1	3.25469	0.144902	0.307651	0.672424	0	0	0	6.777	0	16.227	.	.	.
TRINITY_DN5885_c2_g1	3.25469	0.144902	0.307637	0.672424	0	0	0	10.524	0	25.266	.	.	.
TRINITY_DN3797_c1_g1	3.25469	0.144902	0.307617	0.672424	0	0	0	8.669	0	20.781	.	.	.
TRINITY_DN2061_c1_g1	3.25469	0.144902	0.307608	0.672424	0	0	0	13.391	0	32.25	.	.	.
TRINITY_DN5385_c1_g1	3.25468	0.144902	0.307576	0.672424	0	0	0	5.439	0	13.009	.	.	.
TRINITY_DN9645_c0_g1	3.25468	0.144902	0.307573	0.672424	0	0	0	13.821	0	33.299	.	.	.
TRINITY_DN3438_c1_g1	3.25468	0.144902	0.307571	0.672424	0	0	0	5.792	0	13.865	multidrug resistance protein, putative [Cordyceps militaris CM01]	5e-53	gi|573988393|ref|XP_006672117.1|	Up
TRINITY_DN7162_c0_g1	3.25468	0.144902	0.307568	0.672424	0	0	0	10.38	0	24.935	GARP complex component (Vps54), putative [Cordyceps militaris CM01]	5e-40	gi|573992379|ref|XP_006674110.1|	Up
TRINITY_DN7342_c0_g1	3.25468	0.144902	0.307552	0.672424	0	0	0	12.063	0	29.02	.	.	.
TRINITY_DN3797_c0_g1	3.25468	0.144902	0.307548	0.672424	0	0	0	4.129	0	9.883	.	.	.
TRINITY_DN7845_c0_g1	3.25468	0.144902	0.307535	0.672424	0	0	0	10.658	0	25.608	.	.	.
TRINITY_DN7654_c0_g1	3.25468	0.144902	0.307533	0.672424	0	0	0	10.524	0	25.266	Beta-ketoacyl synthase [Cordyceps militaris CM01]	6e-33	gi|573981265|ref|XP_006668553.1|	Up
TRINITY_DN10811_c0_g1	3.25468	0.144902	0.307532	0.672424	0	0	0	6.71	0	16.079	purine nucleoside permease [Beauveria bassiana ARSEF 2860]	5e-27	gi|667644069|ref|XP_008593866.1|	Up
TRINITY_DN9061_c0_g1	3.25468	0.144902	0.307517	0.672424	0	0	0	10.122	0	24.307	.	.	.
TRINITY_DN5517_c3_g1	3.25468	0.144902	0.307511	0.672424	0	0	0	9.874	0	23.691	.	.	.
TRINITY_DN3864_c1_g1	3.25468	0.144902	0.307507	0.672424	0	0	0	5.563	0	13.317	.	.	.
TRINITY_DN113_c0_g1	3.25467	0.144902	0.307488	0.672424	0	0	0	9.874	0	23.691	glycosyl transferase [Cordyceps militaris CM01]	5e-28	gi|573987799|ref|XP_006671820.1|	Up
TRINITY_DN3119_c0_g1	3.25467	0.144902	0.307487	0.672424	0	0	0	10.256	0	24.615	FAD linked oxidase, N-terminal [Penicillium italicum]	5e-40	gi|700492062|gb|KGO76198.1|	Up
TRINITY_DN6636_c0_g1	3.25467	0.144902	0.307468	0.672424	0	0	0	5.936	0	14.208	.	.	.
TRINITY_DN9495_c0_g1	3.25449	4.19122	0.000141804	0.00323814	2.238	5.759	2.883	15.494	20.049	67.808	secretion pathway protein Sls2/Rcy1, putative [Cordyceps militaris CM01]	7e-111	gi|573992503|ref|XP_006674172.1|	Up
TRINITY_DN9331_c0_g1	3.25243	4.2572	0.00067446	0.0115267	2.521	2.952	3.648	4.77	16.135	66.496	acetolactate synthase [Cordyceps militaris CM01]	0	gi|573990737|ref|XP_006673289.1|	Up
TRINITY_DN3364_c0_g1	3.25155	1.69032	0.00441316	0.0490971	1.87	0	0.861	9.539	7.744	12.576	hypothetical protein CCM_04555 [Cordyceps militaris CM01]	1e-52	gi|573983691|ref|XP_006669766.1|	Up
TRINITY_DN9558_c0_g1	3.25006	5.17055	9.87011e-08	6.58755e-06	6.686	3.913	3.077	39.734	30.862	58.919	Regulator of G protein signaling superfamily [Cordyceps militaris CM01]	0	gi|573993211|ref|XP_006674526.1|	Up
TRINITY_DN10110_c0_g1	3.24926	8.71835	1.43619e-12	2.48094e-10	54.572	51.82	48.997	387.522	606.039	466.34	hypothetical protein CCM_06133 [Cordyceps militaris CM01]	0	gi|573986833|ref|XP_006671337.1|	Up
TRINITY_DN4856_c1_g1	3.24753	0.143573	0.263899	0.640915	0	0	0	15.236	18.296	18.384	pfs domain-containing protein [Cordyceps militaris CM01]	3e-34	gi|573981923|ref|XP_006668882.1|	Up
TRINITY_DN1466_c0_g1	3.24753	0.143573	0.263851	0.640915	0	0	0	14.987	17.983	18.076	hypothetical protein CCM_02407 [Cordyceps militaris CM01]	2e-38	gi|573979354|ref|XP_006667622.1|	Up
TRINITY_DN7828_c0_g1	3.24753	0.143573	0.263836	0.640915	0	0	0	10.944	13.025	13.146	.	.	.
TRINITY_DN8902_c0_g1	3.24753	0.143573	0.263805	0.640915	0	0	0	8.564	10.145	10.271	RNA 3'-terminal phosphate cyclase [Cordyceps militaris CM01]	5e-34	gi|573985039|ref|XP_006670440.1|	Up
TRINITY_DN11532_c0_g1	3.24753	0.143573	0.263777	0.640915	0	0	0	9.635	11.428	11.56	.	.	.
TRINITY_DN11551_c0_g1	3.24753	0.143573	0.263774	0.640915	0	0	0	12.063	14.392	14.504	.	.	.
TRINITY_DN3614_c2_g1	3.24753	0.143573	0.263759	0.640915	0	0	0	7.618	9.007	9.129	.	.	.
TRINITY_DN2357_c1_g1	3.24752	0.143573	0.263743	0.640915	0	0	0	6.414	7.556	7.68	Glycoside hydrolase, clan GH-D [Cordyceps militaris CM01]	3e-32	gi|573984723|ref|XP_006670282.1|	Up
TRINITY_DN5868_c3_g1	3.24752	0.143573	0.263741	0.640915	0	0	0	5.152	6.053	6.162	.	.	.
TRINITY_DN1685_c1_g1	3.24752	0.143573	0.263739	0.640915	0	0	0	15.236	18.296	18.384	von Willebrand domain protein [Cordyceps militaris CM01]	1e-26	gi|573978566|ref|XP_006667228.1|	Up
TRINITY_DN4746_c0_g1	3.24752	0.143573	0.263737	0.640915	0	0	0	7.857	9.289	9.415	Fatty acid hydroxylase [Cordyceps militaris CM01]	1e-50	gi|573993735|ref|XP_006674788.1|	Up
TRINITY_DN8366_c0_g1	3.24752	0.143573	0.263732	0.640915	0	0	0	10.658	12.681	12.804	.	.	.
TRINITY_DN7073_c0_g1	3.24752	0.143573	0.263725	0.640915	0	0	0	7.322	8.642	8.764	.	.	.
TRINITY_DN3469_c1_g1	3.24752	0.143573	0.263724	0.640915	0	0	0	8.861	10.51	10.624	benzoate 4-monooxygenase cytochrome P450 [Cordyceps militaris CM01]	1e-35	gi|573981095|ref|XP_006668468.1|	Up
TRINITY_DN7899_c0_g1	3.24752	0.143573	0.263714	0.640915	0	0	0	12.99	15.52	15.634	.	.	.
TRINITY_DN2150_c0_g1	3.24752	0.143573	0.263712	0.640915	0	0	0	4.607	5.396	5.512	.	.	.
TRINITY_DN9695_c0_g1	3.24752	0.143573	0.263711	0.640915	0	0	0	8.029	9.498	9.62	.	.	.
TRINITY_DN2369_c1_g1	3.24752	0.143573	0.263708	0.640915	0	0	0	5.228	6.147	6.254	.	.	.
TRINITY_DN10752_c0_g1	3.24752	0.143573	0.263707	0.640915	0	0	0	11.891	14.184	14.299	cytochrome P450 [Cordyceps militaris]	3e-39	gi|388250574|gb|AFK23400.1|	Up
TRINITY_DN10857_c0_g1	3.24752	0.143573	0.263683	0.640915	0	0	0	14.987	17.983	18.076	.	.	.
TRINITY_DN6533_c0_g1	3.24681	3.37804	0.00717522	0.0709633	2.776	1.086	2.129	50.458	6.001	1.7	.	.	.
TRINITY_DN5518_c0_g1	3.24583	2.40844	0.00155829	0.022448	1.19	1.394	4.373	10.954	22.596	37.933	kinesin, putative [Cordyceps militaris CM01]	5e-68	gi|573984509|ref|XP_006670175.1|	Up
TRINITY_DN11824_c0_g1	3.24475	0.142244	0.305749	0.672424	0	0	0	15.236	36.592	0	.	.	.
TRINITY_DN8023_c0_g1	3.24475	0.142244	0.305829	0.672424	0	0	0	11.403	27.178	0	hypothetical protein CCM_00838 [Cordyceps militaris CM01]	8e-36	gi|573976230|ref|XP_006666060.1|	Up
TRINITY_DN4432_c1_g1	3.24475	0.142244	0.305843	0.672424	0	0	0	8.029	18.985	0	.	.	.
TRINITY_DN10459_c0_g2	3.24475	0.142244	0.305873	0.672424	0	0	0	2.074	4.018	0	.	.	.
TRINITY_DN3161_c0_g1	3.24475	0.142244	0.305896	0.672424	0	0	0	7.389	17.461	0	.	.	.
TRINITY_DN7018_c0_g1	3.24475	0.142244	0.305908	0.672424	0	0	0	9.291	22.032	0	tyrosinase precursor [Cordyceps militaris CM01]	1e-44	gi|573992057|ref|XP_006673949.1|	Up
TRINITY_DN6978_c0_g1	3.24475	0.142244	0.305931	0.672424	0	0	0	11.25	26.792	0	.	.	.
TRINITY_DN5566_c0_g1	3.24367	5.61735	0.000649905	0.0111829	8.206	6.288	4.683	6.337	15.666	158.315	secretory lipase, putative [Cordyceps militaris CM01]	0	gi|573991003|ref|XP_006673422.1|	Up
TRINITY_DN5213_c1_g3	3.24222	2.19997	0.053133	0.277543	3.541	0	0	0	15.614	17.962	dynamin GTPase, putative [Cordyceps militaris CM01]	0	gi|573983573|ref|XP_006669707.1|	Up
TRINITY_DN3879_c1_g1	3.23852	0.855862	0.0913891	0.370434	0	0	1.867	22.921	0	2.499	.	.	.
TRINITY_DN4182_c1_g1	3.23625	3.01726	0.000259299	0.00534367	1.464	0.433	1.684	9.329	11.658	14.322	hypothetical protein CCM_06053 [Cordyceps militaris CM01]	2e-115	gi|573986673|ref|XP_006671257.1|	Up
TRINITY_DN3571_c0_g3	3.2348	1.34807	0.00792993	0.0762277	1.077	1.269	0	8.574	5.114	10.168	phthalate transporter [Cordyceps militaris CM01]	2e-125	gi|573975504|ref|XP_006665697.1|	Up
TRINITY_DN3438_c0_g1	3.23318	3.04922	0.000554941	0.00985691	1.322	1.154	0.909	9.73	4.269	18.521	multidrug resistance protein, putative [Cordyceps militaris CM01]	0	gi|573988393|ref|XP_006672117.1|	Up
TRINITY_DN4920_c1_g1	3.2325	0.842905	0.0262499	0.174604	0	0	2.632	5.917	13.808	17.7	.	.	.
TRINITY_DN10816_c0_g1	3.22933	0.137254	0.294142	0.66233	0	0	0	29.478	0	17.779	cupin-like protein [Beauveria bassiana ARSEF 2860]	1e-17	gi|667643537|ref|XP_008593600.1|	Up
TRINITY_DN5923_c2_g1	3.22932	0.137254	0.294188	0.66233	0	0	0	11.585	0	6.927	.	.	.
TRINITY_DN8084_c0_g1	3.22931	0.137254	0.294203	0.66233	0	0	0	28.532	0	17.197	efflux pump antibiotic resistance protein, putative [Cordyceps militaris CM01]	1e-28	gi|573975174|ref|XP_006665532.1|	Up
TRINITY_DN4918_c1_g1	3.22931	0.137254	0.294215	0.66233	0	0	0	16.048	0	9.62	S-(hydroxymethyl)glutathione dehydrogenase [Cordyceps militaris CM01]	2e-42	gi|573992717|ref|XP_006674279.1|	Up
TRINITY_DN8082_c0_g1	3.2293	0.137254	0.294234	0.66233	0	0	0	20.244	0	12.153	.	.	.
TRINITY_DN8005_c0_g1	3.2293	0.137254	0.294246	0.66233	0	0	0	28.532	0	17.197	.	.	.
TRINITY_DN4582_c2_g1	3.22929	0.137254	0.294269	0.66233	0	0	0	17.53	0	10.51	.	.	.
TRINITY_DN8801_c0_g1	3.22929	0.137254	0.294293	0.66233	0	0	0	11.585	0	6.927	hypothetical protein CCM_00681 [Cordyceps militaris CM01]	5e-28	gi|573975916|ref|XP_006665903.1|	Up
TRINITY_DN3766_c1_g1	3.22928	0.137254	0.294317	0.66233	0	0	0	24.479	0	14.721	high affinity methionine permease [Cordyceps militaris CM01]	3e-41	gi|573974982|ref|XP_006665436.1|	Up
TRINITY_DN11691_c0_g1	3.22924	0.137254	0.294438	0.66233	0	0	0	23.447	0	14.093	.	.	.
TRINITY_DN10859_c0_g1	3.22923	0.137254	0.294507	0.66233	0	0	0	13.181	0	7.897	cytochrome P450 monooxygenase, putative [Cordyceps militaris CM01]	2e-21	gi|573977588|ref|XP_006666739.1|	Up
TRINITY_DN2877_c0_g1	3.22922	0.137254	0.294527	0.66233	0	0	0	16.765	0	10.042	hypothetical protein CCM_01367 [Cordyceps militaris CM01]	3e-16	gi|573977282|ref|XP_006666586.1|	Up
TRINITY_DN1637_c1_g1	3.22921	0.137254	0.294547	0.66233	0	0	0	10.313	0	6.162	.	.	.
TRINITY_DN4033_c1_g1	3.22921	0.137254	0.294567	0.66233	0	0	0	20.77	0	12.473	.	.	.
TRINITY_DN9847_c0_g1	3.2292	0.137254	0.294587	0.66233	0	0	0	27.633	0	16.65	amidase, putative [Cordyceps militaris CM01]	1e-12	gi|573992399|ref|XP_006674120.1|	Up
TRINITY_DN10848_c0_g1	3.22917	0.137254	0.294683	0.66233	0	0	0	11.871	0	7.11	hypothetical protein CCM_06462 [Cordyceps militaris CM01]	1e-47	gi|573987491|ref|XP_006671666.1|	Up
TRINITY_DN9034_c0_g1	3.22914	0.137254	0.294791	0.66233	0	0	0	25.588	0	15.394	carboxylesterase, putative [Cordyceps militaris CM01]	2e-40	gi|573980364|ref|XP_006668116.1|	Up
TRINITY_DN8086_c0_g1	3.22911	0.137254	0.294899	0.66233	0	0	0	9.272	0	5.546	efflux pump antibiotic resistance protein, putative [Cordyceps militaris CM01]	1e-30	gi|573975772|ref|XP_006665831.1|	Up
TRINITY_DN4501_c2_g1	3.22908	0.137254	0.295006	0.66233	0	0	0	11.307	0	6.767	Putative Dienelactone hydrolase family protein [Torrubiella hemipterigena]	2e-30	gi|729191853|emb|CEJ83196.1|	Up
TRINITY_DN1573_c1_g1	3.22905	0.137254	0.295113	0.66233	0	0	0	31.007	0	18.704	.	.	.
TRINITY_DN8000_c0_g1	3.22902	0.137254	0.29522	0.66233	0	0	0	12.282	0	7.349	.	.	.
TRINITY_DN7176_c0_g1	3.22901	0.137254	0.295252	0.66233	0	0	0	11.585	0	6.927	.	.	.
TRINITY_DN8070_c0_g1	3.22897	0.137254	0.295424	0.66233	0	0	0	24.125	0	14.504	alkaline serine protease Alp1 [Cordyceps militaris CM01]	1e-16	gi|573980927|ref|XP_006668384.1|	Up
TRINITY_DN9036_c0_g1	3.22896	0.137254	0.295452	0.66233	0	0	0	12.722	0	7.612	cell division control protein 3 [Cordyceps militaris CM01]	5e-39	gi|573980599|ref|XP_006668220.1|	Up
TRINITY_DN1735_c0_g1	3.22895	0.137254	0.29548	0.66233	0	0	0	14.49	0	8.673	.	.	.
TRINITY_DN9738_c0_g1	3.22894	0.137254	0.295508	0.66233	0	0	0	25.979	0	15.634	.	.	.
TRINITY_DN8656_c0_g1	3.22893	0.137254	0.295538	0.66233	0	0	0	17.138	0	10.271	.	.	.
TRINITY_DN659_c0_g1	3.22891	0.137254	0.295632	0.66233	0	0	0	29.975	0	18.076	.	.	.
TRINITY_DN6120_c1_g1	3.22888	0.137254	0.295725	0.66233	0	0	0	16.048	0	9.62	.	.	.
TRINITY_DN9844_c0_g1	3.22883	0.137254	0.295915	0.66233	0	0	0	23.122	0	13.899	.	.	.
TRINITY_DN3756_c2_g1	3.22877	0.137254	0.296105	0.662437	0	0	0	29.975	0	18.076	.	.	.
TRINITY_DN10831_c0_g1	3.22876	0.137254	0.296167	0.662437	0	0	0	21.315	0	12.804	.	.	.
TRINITY_DN9031_c0_g1	3.22872	0.137254	0.296295	0.662458	0	0	0	17.931	0	10.75	.	.	.
TRINITY_DN7606_c0_g1	3.22872	0.137254	0.296304	0.662458	0	0	0	13.305	0	7.965	.	.	.
TRINITY_DN1520_c0_g1	3.2287	0.137254	0.296373	0.662458	0	0	0	16.947	0	10.156	asparagine amidohydrolase [Cordyceps militaris CM01]	2e-47	gi|573990115|ref|XP_006672978.1|	Up
TRINITY_DN8890_c0_g1	3.22868	0.137254	0.296435	0.662458	0	0	0	24.842	0	14.938	.	.	.
TRINITY_DN3879_c2_g1	3.22867	0.137254	0.296461	0.662458	0	0	0	12.502	0	7.475	.	.	.
TRINITY_DN11354_c0_g1	3.22867	0.137254	0.296489	0.662458	0	0	0	22.491	0	13.511	.	.	.
TRINITY_DN8074_c0_g1	3.2254	0.135926	0.293783	0.66233	0	0	0	27.633	16.542	0	.	.	.
TRINITY_DN1943_c0_g1	3.22539	0.135926	0.293805	0.66233	0	0	0	17.138	10.145	0	.	.	.
TRINITY_DN7141_c0_g1	3.22538	0.135926	0.293827	0.66233	0	0	0	11.04	6.492	0	hypothetical protein CCM_04333 [Cordyceps militaris CM01]	1e-11	gi|573983247|ref|XP_006669544.1|	Up
TRINITY_DN8078_c0_g1	3.22538	0.135926	0.293846	0.66233	0	0	0	29	17.377	0	.	.	.
TRINITY_DN3061_c0_g1	3.22538	0.135926	0.293848	0.66233	0	0	0	18.581	11.021	0	Cytochrome P450 oxidoreductase, putative [Cordyceps militaris CM01]	2e-46	gi|573990633|ref|XP_006673237.1|	Up
TRINITY_DN6861_c0_g1	3.22537	0.135926	0.29385	0.66233	0	0	0	18.581	11.021	0	.	.	.
TRINITY_DN2572_c0_g1	3.22537	0.135926	0.293855	0.66233	0	0	0	17.138	10.145	0	alpha/beta fold family hydrolase [Talaromyces cellulolyticus]	6e-22	gi|748551492|dbj|GAM42570.1|	Up
TRINITY_DN8952_c0_g1	3.22537	0.135926	0.293857	0.66233	0	0	0	23.122	13.777	0	phosphoribosyl transferase [Cordyceps militaris CM01]	4e-39	gi|573978646|ref|XP_006667268.1|	Up
TRINITY_DN11827_c0_g1	3.22537	0.135926	0.293866	0.66233	0	0	0	25.979	15.52	0	.	.	.
TRINITY_DN10566_c0_g1	3.22537	0.135926	0.293867	0.66233	0	0	0	27.633	16.542	0	.	.	.
TRINITY_DN1875_c1_g1	3.22537	0.135926	0.293876	0.66233	0	0	0	23.447	13.975	0	.	.	.
TRINITY_DN2147_c1_g1	3.22536	0.135926	0.293878	0.66233	0	0	0	10.466	6.147	0	secretory lipase, putative [Cordyceps militaris CM01]	9e-49	gi|573981711|ref|XP_006668776.1|	Up
TRINITY_DN7646_c0_g1	3.22536	0.135926	0.293882	0.66233	0	0	0	19.986	11.877	0	.	.	.
TRINITY_DN11758_c0_g1	3.22536	0.135926	0.29389	0.66233	0	0	0	22.806	13.589	0	.	.	.
TRINITY_DN7120_c0_g1	3.22536	0.135926	0.293895	0.66233	0	0	0	28.073	16.814	0	.	.	.
TRINITY_DN1683_c1_g1	3.22535	0.135926	0.293906	0.66233	0	0	0	19.26	11.428	0	.	.	.
TRINITY_DN1471_c0_g1	3.22535	0.135926	0.293908	0.66233	0	0	0	25.588	15.29	0	.	.	.
TRINITY_DN9197_c0_g1	3.22535	0.135926	0.293909	0.66233	0	0	0	19.499	11.575	0	.	.	.
TRINITY_DN10824_c0_g1	3.22535	0.135926	0.293917	0.66233	0	0	0	10.868	6.387	0	.	.	.
TRINITY_DN4510_c0_g1	3.22535	0.135926	0.293918	0.66233	0	0	0	10.313	6.053	0	chitosanase, putative [Cordyceps militaris CM01]	1e-48	gi|573983869|ref|XP_006669855.1|	Up
TRINITY_DN2656_c1_g1	3.22535	0.135926	0.293926	0.66233	0	0	0	13.946	8.224	0	.	.	.
TRINITY_DN8926_c0_g1	3.22534	0.135926	0.293951	0.66233	0	0	0	15.389	9.101	0	C6 zinc finger domain protein [Cordyceps militaris CM01]	6e-24	gi|573985845|ref|XP_006670843.1|	Up
TRINITY_DN6127_c1_g1	3.22533	0.135926	0.293969	0.66233	0	0	0	19.031	11.293	0	hypothetical protein CCM_05010 [Cordyceps militaris CM01]	1e-16	gi|573984595|ref|XP_006670218.1|	Up
TRINITY_DN7853_c0_g1	3.22531	0.135926	0.294037	0.66233	0	0	0	17.53	10.385	0	nicotinic acid plasma membrane transporter (predicted) [Cordyceps militaris CM01]	1e-32	gi|573981835|ref|XP_006668838.1|	Up
TRINITY_DN2088_c0_g1	3.22528	0.135926	0.294106	0.66233	0	0	0	18.581	11.021	0	DUF572 domain-containing protein [Cordyceps militaris CM01]	6e-35	gi|573982601|ref|XP_006669221.1|	Up
TRINITY_DN8911_c0_g1	3.22528	0.135926	0.294114	0.66233	0	0	0	25.205	15.05	0	.	.	.
TRINITY_DN2334_c1_g1	3.22526	0.135926	0.294174	0.66233	0	0	0	10.39	6.095	0	.	.	.
TRINITY_DN11736_c0_g1	3.22526	0.135926	0.294174	0.66233	0	0	0	29	17.377	0	.	.	.
TRINITY_DN10820_c0_g1	3.22526	0.135926	0.294183	0.66233	0	0	0	21.038	12.514	0	.	.	.
TRINITY_DN9906_c0_g1	3.22525	0.135926	0.294193	0.66233	0	0	0	17.931	10.625	0	hypothetical protein CCM_00439 [Cordyceps militaris CM01]	2e-38	gi|573975434|ref|XP_006665662.1|	Up
TRINITY_DN5402_c1_g1	3.22524	0.135926	0.294213	0.66233	0	0	0	14.347	8.475	0	.	.	.
TRINITY_DN531_c1_g1	3.22524	0.135926	0.29422	0.66233	0	0	0	13.066	7.702	0	.	.	.
TRINITY_DN809_c1_g1	3.22524	0.135926	0.294226	0.66233	0	0	0	30.481	18.296	0	.	.	.
TRINITY_DN11797_c0_g1	3.22524	0.135926	0.294233	0.66233	0	0	0	27.633	16.542	0	.	.	.
TRINITY_DN11566_c0_g1	3.22523	0.135926	0.294248	0.66233	0	0	0	13.066	7.702	0	.	.	.
TRINITY_DN5106_c1_g1	3.22523	0.135926	0.294249	0.66233	0	0	0	25.979	15.52	0	.	.	.
TRINITY_DN3907_c3_g1	3.22523	0.135926	0.294252	0.66233	0	0	0	19.26	11.428	0	tetratricopeptide repeat domain-containing protein [Beauveria bassiana ARSEF 2860]	1e-37	gi|667650345|ref|XP_008597004.1|	Up
TRINITY_DN4347_c1_g2	3.22522	0.135926	0.294272	0.66233	0	0	0	14.328	10.52	1.05	hypothetical protein CCM_01325 [Cordyceps militaris CM01]	1e-35	gi|573977198|ref|XP_006666544.1|	Up
TRINITY_DN7081_c0_g1	3.22522	0.135926	0.294273	0.66233	0	0	0	16.048	9.498	0	.	.	.
TRINITY_DN9813_c0_g1	3.22522	0.135926	0.294274	0.66233	0	0	0	22.806	13.589	0	.	.	.
TRINITY_DN9691_c0_g1	3.22522	0.135926	0.294291	0.66233	0	0	0	24.479	14.612	0	.	.	.
TRINITY_DN5033_c2_g1	3.22521	0.135926	0.294311	0.66233	0	0	0	15.083	8.913	0	nitrate reductase [Cordyceps militaris CM01]	3e-49	gi|573980469|ref|XP_006668166.1|	Up
TRINITY_DN7947_c0_g1	3.22521	0.135926	0.294312	0.66233	0	0	0	25.979	15.52	0	.	.	.
TRINITY_DN4076_c2_g1	3.2252	0.135926	0.294325	0.66233	0	0	0	27.633	16.542	0	.	.	.
TRINITY_DN7638_c0_g1	3.2252	0.135926	0.294325	0.66233	0	0	0	16.048	9.498	0	.	.	.
TRINITY_DN11477_c0_g1	3.2252	0.135926	0.294333	0.66233	0	0	0	16.574	9.811	0	.	.	.
TRINITY_DN9019_c0_g1	3.2252	0.135926	0.29434	0.66233	0	0	0	9.53	5.584	0	.	.	.
TRINITY_DN7906_c0_g1	3.22519	0.135926	0.294366	0.66233	0	0	0	13.554	7.995	0	hypothetical protein CCM_08149 [Cordyceps militaris CM01]	2e-32	gi|573990861|ref|XP_006673351.1|	Up
TRINITY_DN2232_c0_g1	3.22519	0.135926	0.294375	0.66233	0	0	0	12.951	7.629	0	.	.	.
TRINITY_DN5521_c2_g1	3.22334	2.42609	0.00107278	0.0166982	4.108	4.826	3.764	37.87	58.76	27.719	.	.	.
TRINITY_DN11544_c0_g1	3.2224	0.867083	0.148541	0.481104	0	2.894	0	0	0	33.265	putative RNA-dependent RNA polymerase 1 [Amasya cherry disease-associated mycovirus]	1e-38	gi|99644784|emb|CAJ29958.1|	Up
TRINITY_DN54_c0_g1	3.21825	1.32498	0.0147009	0.117208	0	4.307	3.338	7.522	43.992	31.496	.	.	.
TRINITY_DN6027_c1_g1	3.21709	5.084	3.59947e-06	0.000145465	2.323	1.856	1.558	23.38	5.605	23.714	serine/threonine-protein kinase ripk4, putative [Cordyceps militaris CM01]	0	gi|573992981|ref|XP_006674411.1|	Up
TRINITY_DN6016_c2_g1	3.21661	0.843083	0.0289296	0.186855	2.861	0	0	5.859	20.519	10.522	class V chitinase Chi100 [Cordyceps militaris CM01]	1e-61	gi|573984211|ref|XP_006670026.1|	Up
TRINITY_DN5310_c3_g1	3.21548	0.836768	0.0212553	0.151627	0	0	4.122	14.003	21.886	22.333	.	.	.
TRINITY_DN5927_c5_g1	3.21404	0.835682	0.0226674	0.158429	0	0	2.816	9.511	18.505	11.377	hypothetical protein CCM_00773 [Cordyceps militaris CM01]	3e-25	gi|573976100|ref|XP_006665995.1|	Up
TRINITY_DN11455_c0_g1	3.20961	5.71277	0.000151924	0.00341877	13.579	56.637	41.488	92.534	815.069	121.968	sucrose transporter [Cordyceps militaris CM01]	2e-36	gi|573979256|ref|XP_006667573.1|	Up
TRINITY_DN734_c0_g1	3.20907	4.37662	0.00314849	0.0383654	2.597	5.144	6.279	4.473	11.512	112.771	nonspecific lipid-transfer protein [Cordyceps militaris CM01]	0	gi|573989235|ref|XP_006672538.1|	Up
TRINITY_DN5803_c2_g1	3.20795	1.30482	0.00902241	0.083671	1.246	0	1.142	7.628	7.379	12.199	serine peptidase, putative [Cordyceps militaris CM01]	1e-81	gi|573978820|ref|XP_006667355.1|	Up
TRINITY_DN5173_c0_g1	3.20789	6.3299	9.15827e-09	8.00099e-07	10.935	8.057	9.908	59.701	52.028	153.043	Hsp70 family chaperone, putative [Cordyceps militaris CM01]	0	gi|573981693|ref|XP_006668767.1|	Up
TRINITY_DN5647_c1_g2	3.20749	2.52469	0.127784	0.447537	0	1.788	0	0	0	16.889	ATP-binding cassette transporter, putative [Cordyceps militaris CM01]	9e-75	gi|573976804|ref|XP_006666347.1|	Up
TRINITY_DN1888_c0_g1	3.20536	0.839119	0.0213712	0.152207	1.908	0	0	5.84	9.059	9.323	hypothetical protein BBA_09418 [Beauveria bassiana ARSEF 2860]	7e-24	gi|667661811|ref|XP_008602737.1|	Up
TRINITY_DN6787_c0_g1	3.20203	0.836947	0.0278891	0.182747	2.833	0	0	8.717	20.342	6.95	.	.	.
TRINITY_DN4986_c1_g1	3.19453	0.834068	0.0204002	0.147497	2.049	0	0	8.392	7.316	10.042	transcriptional repressor involved in the control of multidrug resistance [Cordyceps militaris CM01]	7e-61	gi|573976160|ref|XP_006666025.1|	Up
TRINITY_DN2004_c0_g1	3.19181	3.3512	0.00635366	0.0648618	2.049	1.596	0.939	1.74	4.029	36.723	metallopeptidase MepB [Cordyceps militaris CM01]	0	gi|573989971|ref|XP_006672906.1|	Up
TRINITY_DN8673_c0_g1	3.1917	2.9178	0.00306437	0.0377594	0.907	2.654	0.832	2.772	15.499	22.15	hypothetical protein CCM_03743 [Cordyceps militaris CM01]	0	gi|573982067|ref|XP_006668954.1|	Up
TRINITY_DN6052_c1_g2	3.18692	1.26503	0.064702	0.309777	0	0	4.286	9.367	0	30.458	.	.	.
TRINITY_DN4364_c0_g1	3.1862	4.68038	2.98289e-06	0.000124546	5.109	5.067	3.977	21.63	50.535	56.237	Trihydrophobin [Beauveria bassiana D1-5]	1e-23	gi|701775485|gb|KGQ09539.1|	Up
TRINITY_DN4715_c1_g1	3.18586	0.847226	0.0359936	0.216972	0	2.932	0	5.114	20.842	6.117	.	.	.
TRINITY_DN2160_c0_g1	3.18551	4.30171	0.000338447	0.00658216	9.811	5.884	0	47.639	41.539	54.32	hypothetical protein CCM_04238 [Cordyceps militaris CM01]	1e-175	gi|573983057|ref|XP_006669449.1|	Up
TRINITY_DN4144_c0_g1	3.1839	4.64192	6.21379e-05	0.00166647	11.728	11.623	8.282	44.159	196.235	46.332	hypothetical protein CCM_01211 [Cordyceps militaris CM01]	8e-176	gi|573976972|ref|XP_006666431.1|	Up
TRINITY_DN3725_c1_g1	3.18315	1.30732	0.00828334	0.0786806	0	3.23	2.506	16.909	23.013	20.244	.	.	.
TRINITY_DN4309_c1_g1	3.18173	0.827929	0.0289662	0.186954	2.502	0	0	12.827	8.965	9.209	.	.	.
TRINITY_DN5710_c1_g2	3.17971	7.96852	2.82679e-11	3.83139e-09	12.465	10.095	8.466	64.194	99.892	113.432	NACHT and WD domain protein [Cordyceps militaris CM01]	0	gi|573985605|ref|XP_006670723.1|	Up
TRINITY_DN5604_c0_g2	3.17572	4.10049	0.00109032	0.0168846	0	2.625	2.67	21.114	6.304	20.53	Rad21/Rec8 like protein [Cordyceps militaris CM01]	0	gi|573982045|ref|XP_006668943.1|	Up
TRINITY_DN4015_c1_g1	3.17434	0.839299	0.0207494	0.148973	0	3.403	0	11.881	10.406	14.219	ankyrin repeat protein [Cordyceps militaris CM01]	2e-34	gi|573990031|ref|XP_006672936.1|	Up
TRINITY_DN2319_c0_g1	3.17059	1.26333	0.0347866	0.213175	0	0	2.148	3.584	18.025	2.864	glutamate carboxypeptidase [Cordyceps militaris CM01]	9e-116	gi|573990407|ref|XP_006673124.1|	Up
TRINITY_DN4364_c2_g1	3.16916	1.91748	0.00492889	0.0537753	5.864	0	1.79	20.006	25.602	31.154	hypothetical protein VHEMI04766 [Torrubiella hemipterigena]	2e-37	gi|729187470|emb|CEJ88606.1|	Up
TRINITY_DN3302_c0_g1	3.16769	0.821789	0.0335202	0.208106	3.503	0	0	21.602	12.629	8.616	.	.	.
TRINITY_DN10248_c0_g1	3.16628	3.74453	3.94104e-05	0.00114025	1.955	1.144	1.355	16.928	12.096	11.355	DUF726 domain protein [Cordyceps militaris CM01]	0	gi|573992261|ref|XP_006674051.1|	Up
TRINITY_DN3929_c1_g1	3.16619	2.14073	0.00174947	0.024426	1.879	0	2.583	16.287	17.764	10.339	.	.	.
TRINITY_DN3269_c0_g1	3.16476	4.76109	0.00161685	0.0231053	0	9.643	8.205	108.133	23.055	28.107	.	.	.
TRINITY_DN6109_c5_g1	3.16439	0.813292	0.0448851	0.250283	0	0	0.581	3.938	2.213	0.719	xaa-pro dipeptidase, putative [Cordyceps militaris CM01]	1e-150	gi|573983383|ref|XP_006669612.1|	Up
TRINITY_DN6001_c0_g1	3.16209	0.129613	0.392441	0.762292	0	0	0	2.724	0	0	hypothetical protein CCM_05435 [Cordyceps militaris CM01]	7e-45	gi|573985443|ref|XP_006670642.1|	Up
TRINITY_DN6235_c1_g1	3.16208	0.129613	0.392465	0.762292	0	0	0	16.306	0	0	.	.	.
TRINITY_DN3120_c0_g1	3.16208	0.129613	0.392486	0.762292	0	0	0	22.624	0	0	hypothetical protein CCM_04429 [Cordyceps militaris CM01]	2e-17	gi|573983439|ref|XP_006669640.1|	Up
TRINITY_DN10759_c0_g1	3.16208	0.129613	0.392489	0.762292	0	0	0	19.422	0	0	.	.	.
TRINITY_DN5151_c1_g1	3.16207	0.129613	0.392513	0.762292	0	0	0	18.113	0	0	.	.	.
TRINITY_DN11678_c0_g1	3.16206	0.129613	0.39253	0.762292	0	0	0	31.973	0	0	.	.	.
TRINITY_DN9800_c0_g1	3.16205	0.129613	0.392574	0.762292	0	0	0	42.802	0	0	hypothetical protein CCM_00574 [Cordyceps militaris CM01]	8e-23	gi|573975704|ref|XP_006665797.1|	Up
TRINITY_DN3416_c0_g1	3.16204	0.129613	0.392596	0.762292	0	0	0	45.717	0	0	.	.	.
TRINITY_DN7154_c0_g1	3.16204	0.129613	0.392618	0.762292	0	0	0	20.914	0	0	.	.	.
TRINITY_DN8380_c1_g1	3.16204	0.129613	0.39262	0.762292	0	0	0	34.687	0	0	.	.	.
TRINITY_DN5123_c0_g1	3.16204	0.129613	0.392622	0.762292	0	0	0	9.157	0	0	ABC transporter C family member 5 [Beauveria bassiana D1-5]	2e-25	gi|701773826|gb|KGQ08179.1|	Up
TRINITY_DN10638_c0_g1	3.16203	0.129613	0.392662	0.762292	0	0	0	40.804	0	0	.	.	.
TRINITY_DN5613_c0_g3	3.16202	0.129613	0.39268	0.762292	0	0	0	3.202	0	0	.	.	.
TRINITY_DN8076_c0_g1	3.16201	0.129613	0.392706	0.762292	0	0	0	24.603	0	0	sarcosine oxidase [Cordyceps militaris CM01]	2e-47	gi|573984523|ref|XP_006670182.1|	Up
TRINITY_DN10222_c0_g1	3.16201	0.129613	0.392715	0.762292	0	0	0	26.907	0	0	.	.	.
TRINITY_DN2972_c0_g1	3.16201	0.129613	0.392732	0.762292	0	0	0	20.522	0	0	.	.	.
TRINITY_DN2904_c0_g1	3.162	0.129613	0.392749	0.762292	0	0	0	27.862	0	0	.	.	.
TRINITY_DN9807_c0_g1	3.162	0.129613	0.392765	0.762292	0	0	0	14.49	0	0	.	.	.
TRINITY_DN8489_c0_g1	3.16199	0.129613	0.392779	0.762292	0	0	0	45.717	0	0	.	.	.
TRINITY_DN9378_c0_g1	3.16196	0.129613	0.392877	0.762292	0	0	0	18.428	0	0	.	.	.
TRINITY_DN4534_c0_g1	3.16196	0.129613	0.392895	0.762292	0	0	0	14.395	0	0	.	.	.
TRINITY_DN3470_c0_g1	3.16195	0.129613	0.392939	0.762292	0	0	0	10.648	0	0	Retrovirus-related Pol polyprotein from type-1 retrotransposable element R1 [Beauveria bassiana D1-5]	2e-35	gi|701766623|gb|KGQ02481.1|	Up
TRINITY_DN5627_c1_g1	3.16194	0.129613	0.392963	0.762292	0	0	0	43.5	0	0	.	.	.
TRINITY_DN2043_c0_g1	3.16193	0.129613	0.392979	0.762292	0	0	0	39.562	0	0	Protein kinase-like domain [Cordyceps militaris CM01]	9e-18	gi|573982845|ref|XP_006669343.1|	Up
TRINITY_DN11617_c0_g1	3.16193	0.129613	0.39298	0.762292	0	0	0	22.395	0	0	.	.	.
TRINITY_DN4442_c2_g1	3.16193	0.129613	0.392982	0.762292	0	0	0	23.571	0	0	.	.	.
TRINITY_DN2398_c1_g1	3.16193	0.129613	0.392992	0.762292	0	0	0	24.871	0	0	.	.	.
TRINITY_DN8791_c0_g1	3.16193	0.129613	0.393001	0.762292	0	0	0	26.295	0	0	.	.	.
TRINITY_DN4560_c0_g1	3.16192	0.129613	0.39302	0.762292	0	0	0	22.624	0	0	hypothetical protein CCM_06455 [Cordyceps militaris CM01]	2e-20	gi|573987477|ref|XP_006671659.1|	Up
TRINITY_DN2037_c0_g1	3.16192	0.129613	0.39302	0.762292	0	0	0	29.248	0	0	.	.	.
TRINITY_DN9852_c0_g1	3.16191	0.129613	0.393062	0.762292	0	0	0	22.854	0	0	.	.	.
TRINITY_DN6937_c0_g1	3.1619	0.129613	0.393088	0.762292	0	0	0	34.687	0	0	.	.	.
TRINITY_DN8034_c0_g1	3.16189	0.129613	0.393144	0.762292	0	0	0	43.5	0	0	.	.	.
TRINITY_DN825_c1_g1	3.16188	0.129613	0.393181	0.762292	0	0	0	23.571	0	0	hypothetical protein CCM_04561 [Cordyceps militaris CM01]	2e-26	gi|573983703|ref|XP_006669772.1|	Up
TRINITY_DN4882_c0_g1	3.16187	0.129613	0.393197	0.762292	0	0	0	30.367	0	0	.	.	.
TRINITY_DN10138_c0_g1	3.16185	0.129613	0.393282	0.762292	0	0	0	40.174	0	0	.	.	.
TRINITY_DN3723_c0_g1	3.16182	0.129613	0.393367	0.762292	0	0	0	1.74	0	0	amidohydrolase 3 [Cordyceps militaris CM01]	0	gi|573976426|ref|XP_006666158.1|	Up
TRINITY_DN9607_c0_g1	3.1618	0.129613	0.393437	0.762292	0	0	0	37.813	0	0	hypothetical protein EPUS_06362 [Endocarpon pusillum Z07020]	1e-21	gi|629641454|ref|XP_007800225.1|	Up
TRINITY_DN4210_c1_g1	3.1618	0.129613	0.393465	0.762292	0	0	0	34.687	0	0	C6 transcription factor, putative [Cordyceps militaris CM01]	6e-29	gi|573986327|ref|XP_006671084.1|	Up
TRINITY_DN5903_c2_g3	3.16177	0.129613	0.393537	0.762292	0	0	0	0.956	0	0	proteasome maturation ans ribosome synthesis protein Nop10, putative [Cordyceps militaris CM01]	0	gi|573984409|ref|XP_006670125.1|	Up
TRINITY_DN10654_c0_g1	3.16175	0.129613	0.393638	0.762292	0	0	0	46.501	0	0	.	.	.
TRINITY_DN2126_c0_g1	3.16174	0.129613	0.393673	0.762292	0	0	0	26.591	0	0	.	.	.
TRINITY_DN9878_c0_g1	3.16173	0.129613	0.393689	0.762292	0	0	0	26.295	0	0	Fe(2+) transport protein 3 [Cordyceps militaris CM01]	2e-46	gi|573989749|ref|XP_006672795.1|	Up
TRINITY_DN7143_c0_g1	3.16172	0.129613	0.393717	0.762292	0	0	0	30.759	0	0	.	.	.
TRINITY_DN10711_c0_g1	3.16172	0.129613	0.393738	0.762292	0	0	0	32.842	0	0	.	.	.
TRINITY_DN6901_c0_g1	3.16172	0.129613	0.393744	0.762292	0	0	0	34.209	0	0	.	.	.
TRINITY_DN76_c0_g1	3.16171	0.129613	0.393779	0.762292	0	0	0	17.903	0	0	kinesin-like protein [Beauveria bassiana ARSEF 2860]	1e-27	gi|667644611|ref|XP_008594137.1|	Up
TRINITY_DN10649_c0_g1	3.1617	0.129613	0.393814	0.762292	0	0	0	15.58	0	0	.	.	.
TRINITY_DN8098_c0_g1	3.16169	0.129613	0.393849	0.762292	0	0	0	23.571	0	0	.	.	.
TRINITY_DN1603_c1_g1	3.16168	0.129613	0.393883	0.762292	0	0	0	17.377	0	0	.	.	.
TRINITY_DN9846_c0_g1	3.16167	0.129613	0.393913	0.762292	0	0	0	21.315	0	0	.	.	.
TRINITY_DN4584_c0_g1	3.16167	0.129613	0.39392	0.762292	0	0	0	22.175	0	0	GDSL lipase/acylhydrolase family protein [Cordyceps militaris CM01]	2e-52	gi|573983055|ref|XP_006669448.1|	Up
TRINITY_DN3133_c1_g1	3.16166	0.129613	0.393934	0.762292	0	0	0	34.209	0	0	.	.	.
TRINITY_DN6249_c1_g1	3.16165	0.129613	0.393961	0.762292	0	0	0	27.862	0	0	.	.	.
TRINITY_DN10520_c0_g1	3.16165	0.129613	0.393965	0.762292	0	0	0	32.403	0	0	hypothetical protein CCM_08824 [Cordyceps militaris CM01]	2e-12	gi|573992205|ref|XP_006674023.1|	Up
TRINITY_DN4864_c0_g1	3.16165	0.129613	0.393983	0.762292	0	0	0	21.525	0	0	.	.	.
TRINITY_DN10641_c0_g1	3.16165	0.129613	0.393983	0.762292	0	0	0	41.454	0	0	.	.	.
TRINITY_DN5977_c2_g1	3.16165	0.129613	0.393984	0.762292	0	0	0	27.862	0	0	.	.	.
TRINITY_DN5693_c2_g1	3.16164	0.129613	0.394003	0.762292	0	0	0	40.804	0	0	.	.	.
TRINITY_DN5369_c1_g1	3.16164	0.129613	0.394004	0.762292	0	0	0	22.624	0	0	.	.	.
TRINITY_DN7538_c0_g1	3.16163	0.129613	0.394029	0.762292	0	0	0	19.604	0	0	.	.	.
TRINITY_DN4857_c0_g2	3.16163	0.129613	0.394035	0.762292	0	0	0	15.666	0	0	.	.	.
TRINITY_DN7114_c0_g1	3.16163	0.129613	0.394056	0.762292	0	0	0	39.562	0	0	.	.	.
TRINITY_DN11671_c0_g1	3.16162	0.129613	0.394065	0.762292	0	0	0	28.197	0	0	.	.	.
TRINITY_DN768_c1_g1	3.16162	0.129613	0.394083	0.762292	0	0	0	24.603	0	0	.	.	.
TRINITY_DN153_c0_g1	3.16161	0.129613	0.394103	0.762292	0	0	0	16.565	0	0	.	.	.
TRINITY_DN9855_c0_g1	3.16161	0.129613	0.394126	0.762292	0	0	0	26.591	0	0	.	.	.
TRINITY_DN5749_c0_g2	3.16159	0.129613	0.394187	0.762292	0	0	0	0.516	0	0	pre-mRNA splicing factor SYF1 [Cordyceps militaris CM01]	0	gi|573975324|ref|XP_006665607.1|	Up
TRINITY_DN5540_c1_g2	3.16158	0.129613	0.394207	0.762292	0	0	0	23.332	0	0	abc transporter [Cordyceps militaris CM01]	3e-40	gi|573990681|ref|XP_006673261.1|	Up
TRINITY_DN3880_c1_g1	3.16157	0.129613	0.394248	0.762292	0	0	0	20.713	0	0	Protein kinase-like domain [Cordyceps militaris CM01]	3e-44	gi|573979056|ref|XP_006667473.1|	Up
TRINITY_DN1217_c1_g1	3.16149	0.834249	0.0326478	0.204208	0	3.471	0	15.131	7.066	14.481	hypothetical protein BBAD15_g6362 [Beauveria bassiana D1-5]	3e-32	gi|701773963|gb|KGQ08289.1|	Up
TRINITY_DN6004_c0_g1	3.15819	8.17657	3.64371e-12	5.94465e-10	11.662	17.209	14.62	112.797	123.792	148.227	hypothetical protein CCM_04508 [Cordyceps militaris CM01]	6e-162	gi|573983597|ref|XP_006669719.1|	Up
TRINITY_DN586_c0_g1	3.15729	0.810408	0.0766179	0.343601	0	0	2.941	26.505	0	11.891	alpha,alpha-trehalose glucohydrolase TreA/Ath1 [Cordyceps militaris CM01]	1e-33	gi|573978352|ref|XP_006667121.1|	Up
TRINITY_DN7425_c0_g1	3.15694	1.63091	0.00840414	0.0795706	2.965	0	1.364	22.758	14.1	7.269	O-methyltransferase family protein [Cordyceps militaris CM01]	6e-117	gi|573991115|ref|XP_006673478.1|	Up
TRINITY_DN4537_c1_g1	3.15636	0.796827	0.163919	0.510991	4.089	0	0	0	0	50.326	.	.	.
TRINITY_DN11267_c0_g1	3.15571	0.81782	0.045584	0.251942	2.238	0	0	16.02	2.661	8.216	.	.	.
TRINITY_DN3635_c0_g2	3.15227	2.27726	0.0481042	0.260627	0	1.577	0	6.815	6.732	0	fungal specific transcription factor [Beauveria bassiana ARSEF 2860]	0	gi|667653001|ref|XP_008598332.1|	Up
TRINITY_DN5025_c1_g1	3.15115	0.808235	0.0525349	0.275578	0	0	2.351	21.105	6.147	3.161	.	.	.
TRINITY_DN5658_c4_g1	3.14722	1.64861	0.00581261	0.061365	2.266	1.327	0	13.907	12.096	8.331	hypothetical protein BBAD15_g5637 [Beauveria bassiana D1-5]	6e-69	gi|701774854|gb|KGQ09039.1|	Up
TRINITY_DN4635_c3_g1	3.14554	1.25757	0.0144357	0.115677	0	0	2.68	7.484	13.902	8.97	Heat-labile enterotoxin, A chain [Cordyceps militaris CM01]	8e-14	gi|573986291|ref|XP_006671066.1|	Up
TRINITY_DN4600_c0_g1	3.14213	4.95353	8.11831e-06	0.000301147	2.266	2.298	2.225	23.064	6.398	30.264	ankyrin 2,3/unc44, putative [Cordyceps militaris CM01]	0	gi|573974964|ref|XP_006665427.1|	Up
TRINITY_DN3444_c0_g3	3.1412	5.50624	0.000150081	0.00338596	7.016	5.999	4.964	128.005	15.885	13.842	hypothetical protein CCM_08083 [Cordyceps militaris CM01]	6e-107	gi|573990729|ref|XP_006673285.1|	Up
TRINITY_DN5819_c0_g2	3.13925	3.54913	0.0130851	0.107637	3.522	0	0	12.445	4.644	13.546	DUF455 domain protein [Cordyceps militaris CM01]	0	gi|573980404|ref|XP_006668136.1|	Up
TRINITY_DN4072_c0_g2	3.13311	1.86741	0.00518313	0.0560703	0	0	2.003	7.962	6.179	7.132	hypothetical protein CCM_08885 [Cordyceps militaris CM01]	9e-163	gi|573992327|ref|XP_006674084.1|	Up
TRINITY_DN1869_c0_g1	3.13264	0.80209	0.0858346	0.359326	0	0	1.403	14.051	3.622	0	zinc knuckle transcription factor (CnjB), putative [Cordyceps militaris CM01]	1e-128	gi|573992799|ref|XP_006674320.1|	Up
TRINITY_DN6016_c0_g2	3.1309	4.40016	1.78232e-05	0.000588099	4.703	5.759	7.915	27.566	82.723	53.35	hypothetical protein BBAD15_g10412 [Beauveria bassiana D1-5]	3e-129	gi|701769171|gb|KGQ04358.1|	Up
TRINITY_DN5687_c2_g1	3.12962	0.781869	0.0923284	0.372357	0	0	2.003	4.483	0	21.465	autophagy protein (Atg22), putative [Cordyceps militaris CM01]	5e-97	gi|573983793|ref|XP_006669817.1|	Up
TRINITY_DN9746_c0_g1	3.12945	1.30425	0.0113449	0.0983004	0	5.192	0	18.113	15.812	13.557	.	.	.
TRINITY_DN3443_c0_g2	3.12705	8.73523	9.22913e-12	1.40187e-09	37.735	22.564	32.297	257.921	277.632	264.729	frequency clock protein [Cordyceps militaris CM01]	0	gi|573976580|ref|XP_006666235.1|	Up
TRINITY_DN478_c0_g1	3.12527	1.27907	0.0177397	0.132929	1.095	1.279	0	3.355	6.481	13.386	.	.	.
TRINITY_DN10226_c0_g1	3.12215	1.23381	0.0688921	0.322209	1.388	0	1.277	2.839	0	25.551	autophagy protein (Atg22), putative [Beauveria bassiana ARSEF 2860]	7e-61	gi|667654267|ref|XP_008598965.1|	Up
TRINITY_DN6145_c2_g1	3.12045	0.798117	0.103951	0.39835	0	0	1.964	18.237	0	2.191	Acetate transporter, putative [Cordyceps militaris CM01]	2e-12	gi|573990545|ref|XP_006673193.1|	Up
TRINITY_DN5042_c0_g1	3.11803	0.805535	0.0673119	0.316952	3.23	0	0	29.822	3.872	3.96	.	.	.
TRINITY_DN1922_c0_g1	3.11609	0.786851	0.109144	0.410398	1.945	0	0	0	20.884	2.385	Dual oxidase 2 [Beauveria bassiana D1-5]	5e-106	gi|701766937|gb|KGQ02670.1|	Up
TRINITY_DN5518_c1_g2	3.11581	3.64012	0.000471647	0.00866199	2.115	1.548	0.909	4.206	19.778	15.474	kinesin, putative [Cordyceps militaris CM01]	0	gi|573984509|ref|XP_006670175.1|	Up
TRINITY_DN8693_c0_g1	3.11336	1.88862	0.00355866	0.0418873	0.774	0.904	1.413	7.847	9.091	12.233	.	.	.
TRINITY_DN11524_c0_g1	3.1121	0.782601	0.0440136	0.247059	0	0	1.8	2.017	11.71	9.643	dipeptidyl peptidase III [Beauveria bassiana ARSEF 2860]	2e-17	gi|667647039|ref|XP_008595351.1|	Up
TRINITY_DN7034_c0_g1	3.11095	0.804448	0.0865155	0.359577	1.908	0	0	17.52	4.53	0	.	.	.
TRINITY_DN905_c0_g1	3.10549	4.0718	0.000656925	0.0112927	0	3.49	5.438	31.628	18.609	25.779	vacuolar ATP synthase subunit H [Cordyceps militaris CM01]	0	gi|573988215|ref|XP_006672028.1|	Up
TRINITY_DN11579_c0_g1	3.1038	2.53446	0.00359932	0.04228	1.341	2.355	1.229	28.034	9.508	5.74	ABC multidrug transporter, putative [Cordyceps militaris CM01]	2e-54	gi|573984545|ref|XP_006670193.1|	Up
TRINITY_DN10549_c0_g1	3.10308	1.62701	0.0143343	0.115381	2.096	1.231	0	19.279	3.726	7.703	.	.	.
TRINITY_DN2628_c0_g1	3.103	1.26244	0.0421561	0.240585	2.304	0	0	17.626	4.091	1.404	Protein kinase-like domain [Cordyceps militaris CM01]	3e-80	gi|573988487|ref|XP_006672164.1|	Up
TRINITY_DN5823_c2_g1	3.10232	0.81583	0.0535446	0.278928	0	2.952	0	20.608	6.001	3.081	Der1-like protein [Cordyceps militaris CM01]	1e-12	gi|573990107|ref|XP_006672974.1|	Up
TRINITY_DN5927_c3_g1	3.10182	0.819799	0.0725723	0.332094	0	4.596	0	28.054	18.766	0	.	.	.
TRINITY_DN10496_c0_g1	3.09804	2.31625	0.000825186	0.0136268	3.126	1.221	1.916	18.094	20.978	17.859	Multidrug resistance-associated protein 1 [Beauveria bassiana D1-5]	1e-87	gi|701774622|gb|KGQ08849.1|	Up
TRINITY_DN2935_c0_g1	3.09617	0.800476	0.104411	0.399765	2.229	0	0	22.797	0	2.727	peptidase S1 and S6, chymotrypsin/Hap [Beauveria bassiana ARSEF 2860]	6e-41	gi|667650877|ref|XP_008597270.1|	Up
TRINITY_DN3030_c0_g1	3.09262	0.79939	0.104368	0.39969	2.691	0	0	27.595	3.215	0	hypothetical protein CCM_09547 [Cordyceps militaris CM01]	2e-55	gi|573993645|ref|XP_006674743.1|	Up
TRINITY_DN4799_c1_g1	3.09047	0.79996	0.0932831	0.374749	0	2.048	0	0	4.154	17.129	hypothetical protein CCM_02496 [Cordyceps militaris CM01]	1e-118	gi|573979532|ref|XP_006667711.1|	Up
TRINITY_DN4920_c0_g1	3.08887	1.59081	0.00659348	0.0669609	0	1.413	2.216	8.631	14.309	11.823	hypothetical protein CCM_02126 [Cordyceps militaris CM01]	5e-64	gi|573978794|ref|XP_006667342.1|	Up
TRINITY_DN5867_c1_g1	3.08602	3.84799	0.000109445	0.00263446	2.521	3.375	1.655	11.384	31.874	20.712	hypothetical protein A1O3_05195 [Capronia epimyces CBS 606.96]	4e-157	gi|628295227|ref|XP_007733511.1|
TRINITY_DN6527_c0_g1	3.07952	3.71903	0.00323899	0.0391702	1.719	1.606	3.154	3.842	6.064	45.681	alkaline serine protease AorO, putative [Cordyceps militaris CM01]	0	gi|573978728|ref|XP_006667309.1|	Up
TRINITY_DN4528_c1_g2	3.07838	2.68697	0.0703106	0.325249	0	0	3.444	0	22.001	9.312	PHD transcription factor, putative [Cordyceps militaris CM01]	0	gi|573984297|ref|XP_006670069.1|	Up
TRINITY_DN1798_c1_g1	3.07512	2.08846	0.0095239	0.0868138	1.294	1.519	3.561	26.41	1.534	30.07	subtilisin, putative [Cordyceps militaris CM01]	4e-156	gi|573981703|ref|XP_006668772.1|	Up
TRINITY_DN3851_c0_g2	3.07413	9.57941	3.65828e-06	0.000147503	40.889	105.842	87.776	173.98	1183.68	591.424	hypothetical protein CCM_05677 [Cordyceps militaris CM01]	0	gi|573985927|ref|XP_006670884.1|	Up
TRINITY_DN5463_c0_g1	3.07123	3.86871	3.77357e-05	0.00110633	3.296	2.557	3.096	33.186	16.689	27.228	oryzin precursor [Cordyceps militaris CM01]	0	gi|573983195|ref|XP_006669518.1|	Up
TRINITY_DN1127_c0_g1	3.06954	3.37207	0.00544356	0.0583623	1.36	7.307	3.444	23.858	7.546	64.339	hypothetical protein CCM_08082 [Cordyceps militaris CM01]	6e-120	gi|573990727|ref|XP_006673284.1|	Up
TRINITY_DN3640_c0_g1	3.06803	1.23485	0.0239802	0.164393	2.805	0	0	15.733	4.978	6.858	.	.	.
TRINITY_DN3943_c1_g1	3.0661	1.60737	0.00876056	0.0819761	0	2.029	0.793	12.359	5.114	7.406	alpha,alpha-trehalose glucohydrolase TreA/Ath1 [Cordyceps militaris CM01]	0	gi|573978352|ref|XP_006667121.1|	Up
TRINITY_DN7203_c0_g1	3.06551	5.00382	6.2956e-06	0.000240626	10.463	16.719	19.215	167.92	50.64	169.921	.	.	.
TRINITY_DN6809_c0_g1	3.0651	0.765988	0.0384991	0.226344	0	0	2.032	9.09	7.932	8.159	.	.	.
TRINITY_DN10318_c0_g1	3.06509	0.765988	0.0384726	0.226284	0	0	1.587	7.092	6.179	6.368	.	.	.
TRINITY_DN5264_c0_g1	3.06359	5.12534	0.00505188	0.0549131	7.101	2.827	4.015	106.154	6.387	2.625	oxidoreductase, putative [Cordyceps militaris CM01]	4e-145	gi|573990241|ref|XP_006673041.1|	Up
TRINITY_DN8388_c0_g1	3.06352	0.76488	0.0416022	0.238776	0	0	2.187	9.807	11.418	5.866	.	.	.
TRINITY_DN11429_c0_g1	3.06182	1.25642	0.0576859	0.289387	0	1.173	0.919	17.329	1.179	1.221	RNA binding protein MSSP-2 [Cordyceps militaris CM01]	5e-141	gi|573988093|ref|XP_006671967.1|	Up
TRINITY_DN8577_c0_g1	3.06168	4.62436	1.32049e-05	0.000455322	5.298	3.538	5.215	17.339	50.817	49.458	protein kinase domain protein [Cordyceps militaris CM01]	0	gi|573991495|ref|XP_006673668.1|	Up
TRINITY_DN690_c1_g1	3.05884	0.761927	0.0528656	0.276818	0	0	2.38	13.353	3.11	12.781	hypothetical protein CCM_00328 [Cordyceps militaris CM01]	2e-16	gi|573975212|ref|XP_006665551.1|	Up
TRINITY_DN9765_c0_g1	3.05832	0.769511	0.0424635	0.241951	3.702	0	0	15.217	8.903	18.202	.	.	.
TRINITY_DN3768_c1_g1	3.05765	1.87941	0.0111637	0.0972818	1.124	2.634	1.035	17.224	2.661	22.025	hypothetical protein CCM_08884 [Cordyceps militaris CM01]	8e-83	gi|573992325|ref|XP_006674083.1|	Up
TRINITY_DN5230_c0_g2	3.05166	6.1356	1.05272e-08	9.13739e-07	8.149	6.961	9.84	48.317	108.262	48.032	C6 transcription factor, putative [Cordyceps militaris CM01]	0	gi|573988843|ref|XP_006672342.1|	Up
TRINITY_DN6289_c0_g2	3.04718	3.16529	0.00159063	0.0227861	4.353	0	6.405	20.111	25.289	47.199	.	.	.
TRINITY_DN6128_c3_g1	3.04625	0.764342	0.0531459	0.277543	2.493	0	0	12.779	2.975	12.233	.	.	.
TRINITY_DN11213_c0_g1	3.04625	0.764342	0.0531706	0.27759	2.635	0	0	13.515	3.152	12.941	integral membrane protein [Cordyceps militaris CM01]	6e-25	gi|573986997|ref|XP_006671419.1|	Up
TRINITY_DN7671_c0_g1	3.04556	4.0902	3.42966e-05	0.00101735	3.588	3.259	3.299	41.77	16.897	25.3	Myb-like DNA-binding protein myb-1 [Beauveria bassiana D1-5]	7e-69	gi|701770960|gb|KGQ05843.1|	Up
TRINITY_DN1096_c0_g1	3.04543	2.84901	0.0124192	0.104203	1.18	0.461	2.177	11.241	0.47	21.203	Heterokaryon incompatibility [Cordyceps militaris CM01]	0	gi|573975750|ref|XP_006665820.1|	Up
TRINITY_DN3513_c2_g1	3.04457	0.763233	0.0427596	0.24304	3.239	0	0	16.651	7.775	11.948	.	.	.
TRINITY_DN5885_c0_g2	3.04438	6.07721	0.00151787	0.0219942	4.599	10.278	0	18.448	35.099	67.09	sister chromatid cohesion protein Eso1 [Cordyceps militaris CM01]	0	gi|573987565|ref|XP_006671703.1|	Up
TRINITY_DN779_c0_g1	3.04362	0.755648	0.0553857	0.283174	0	0	3.048	20.598	4.008	12.325	.	.	.
TRINITY_DN4938_c0_g1	3.04108	3.52712	0.000993997	0.0157928	5.194	6.653	1.316	13.286	48.02	46.297	.	.	.
TRINITY_DN5595_c1_g1	3.04082	2.26264	0.00827238	0.0786188	24.892	0	11.282	226.809	45.359	53.761	.	.	.
TRINITY_DN5179_c1_g1	3.04053	4.20843	2.11515e-05	0.000675163	3.277	4.269	2.68	24.871	19.757	39.188	amino acid permease 2 [Cordyceps militaris CM01]	0	gi|573987721|ref|XP_006671781.1|	Up
TRINITY_DN5042_c1_g1	3.04037	0.804631	0.105974	0.40321	0	1.913	0	16.689	1.941	0	Sporulation-specific protein 5 [Beauveria bassiana D1-5]	1e-98	gi|701767616|gb|KGQ03133.1|	Up
TRINITY_DN6710_c0_g1	3.03923	0.726416	0.187224	0.540793	0	0	2.68	0	0	32.444	hypothetical protein CCM_02561 [Cordyceps militaris CM01]	2e-78	gi|573979662|ref|XP_006667776.1|	Up
TRINITY_DN8206_c0_g1	3.03875	1.85867	0.0200684	0.145937	1.662	0.971	0.764	22.93	4.926	2.031	peptidase S1 and S6, chymotrypsin/Hap [Beauveria bassiana ARSEF 2860]	9e-47	gi|667650877|ref|XP_008597270.1|	Up
TRINITY_DN10550_c0_g1	3.03821	0.761016	0.0519306	0.273711	3.324	0	0	17.081	15.958	4.085	.	.	.
TRINITY_DN4936_c0_g1	3.03806	5.72189	1.72161e-08	1.39792e-06	8.319	7.336	3.831	72.519	46.277	39.952	MFS multidrug transporter, putative [Cordyceps militaris CM01]	0	gi|573980278|ref|XP_006668080.1|	Up
TRINITY_DN4813_c1_g1	3.03619	2.1035	0.0271711	0.179041	0	3.682	1.925	10.715	1.242	35.901	hypothetical protein TCE0_017f03825 [Talaromyces cellulolyticus]	2e-33	gi|748558717|dbj|GAM35467.1|	Up
TRINITY_DN870_c0_g1	3.03452	2.95601	0.00137326	0.0203696	1.388	0.817	5.109	15.58	27.898	19.537	hypothetical protein CCM_04852 [Cordyceps militaris CM01]	1e-36	gi|573984281|ref|XP_006670061.1|	Up
TRINITY_DN2016_c0_g1	3.0337	2.41657	0.00324503	0.039205	1.653	0	2.022	15.714	5.198	11.446	hypothetical protein THITE_119017 [Thielavia terrestris NRRL 8126]	6e-30	gi|367044486|ref|XP_003652623.1|	Up
TRINITY_DN10593_c0_g1	3.02451	0.748259	0.0630223	0.305321	0	0	4.18	33.12	11.094	5.66	.	.	.
TRINITY_DN11072_c0_g1	3.02404	4.84639	1.11138e-06	5.39461e-05	7.413	6.509	6.821	48.164	41.549	78.752	hypothetical protein CCM_00196 [Cordyceps militaris CM01]	9e-62	gi|573974948|ref|XP_006665419.1|	Up
TRINITY_DN5626_c9_g1	3.02313	1.55614	0.00779262	0.0752774	2.077	2.432	1.896	12.751	29.672	15.269	hypothetical protein CCM_08556 [Cordyceps militaris CM01]	9e-81	gi|573991673|ref|XP_006673757.1|	Up
TRINITY_DN3609_c0_g1	3.02232	2.04844	0.0208833	0.149579	3.097	0	0	3.565	13.704	12.108	hypothetical protein CCM_00540 [Cordyceps militaris CM01]	9e-102	gi|573975636|ref|XP_006665763.1|	Up
TRINITY_DN1751_c1_g1	3.02014	1.82854	0.0063489	0.0648508	1.511	1.769	2.767	26.218	17.91	9.243	.	.	.
TRINITY_DN4819_c1_g1	3.01683	4.92763	6.06913e-07	3.22103e-05	29	24.016	28.127	279.083	150.02	229.855	hypothetical protein BBA_02161 [Beauveria bassiana ARSEF 2860]	1e-23	gi|667647297|ref|XP_008595480.1|	Up
TRINITY_DN10518_c0_g1	3.01271	3.35507	0.00180953	0.0250463	16.932	5.682	13.265	49.569	202.121	47.473	.	.	.
TRINITY_DN5115_c0_g1	3.01193	0.744195	0.101587	0.394614	0	0	1.055	9.463	0	2.419	hypothetical protein CCM_09609 [Cordyceps militaris CM01]	3e-20	gi|573993769|ref|XP_006674805.1|	Up
TRINITY_DN1199_c1_g1	3.01104	2.02334	0.0384161	0.226234	1.162	0	4.267	43.882	1.378	2.842	ABC multidrug transporter, putative [Cordyceps militaris CM01]	1e-15	gi|573990035|ref|XP_006672938.1|	Up
TRINITY_DN1839_c0_g1	3.01072	1.51697	0.0213453	0.152146	0	0	4.199	20.197	10.166	6.813	hypothetical protein CCM_09509 [Cordyceps militaris CM01]	4e-110	gi|573993569|ref|XP_006674705.1|	Up
TRINITY_DN1662_c0_g1	3.00917	0.743086	0.0798033	0.350543	0	0	2.274	20.369	2.964	3.047	zinc knuckle transcription factor (CnjB), putative [Cordyceps militaris CM01]	1e-38	gi|573992799|ref|XP_006674320.1|	Up
TRINITY_DN278_c0_g1	3.00795	1.21148	0.0864146	0.359577	2.72	0	0	22.204	0	3.332	.	.	.
TRINITY_DN11023_c2_g1	3.0071	5.46837	3.02912e-06	0.000126178	3.23	5.432	5.573	59.787	13.787	40.192	hypothetical protein CCM_04438 [Cordyceps militaris CM01]	0	gi|573983457|ref|XP_006669649.1|	Up
TRINITY_DN6571_c0_g1	3.00663	2.7118	0.00101468	0.0160059	4.297	1.259	3.948	36.178	25.435	18.396	Protein kinase-like domain [Cordyceps militaris CM01]	2e-156	gi|573981607|ref|XP_006668724.1|	Up
TRINITY_DN5249_c0_g1	3.00465	2.57372	0.00330447	0.0397711	2.077	2.432	3.812	10.591	12.284	46.971	.	.	.
TRINITY_DN11269_c0_g1	3.00448	3.36332	0.000332591	0.00649593	2.88	4.499	7.053	44.073	26.124	48.146	.	.	.
TRINITY_DN6659_c0_g1	3.00375	1.19581	0.020115	0.146141	3.201	0	0	14.71	5.699	9.791	.	.	.
TRINITY_DN3243_c0_g1	3.00229	4.59982	0.000588358	0.010305	5.524	4.374	2.583	4.674	52.748	41.961	isoflavone reductase family protein [Cordyceps militaris CM01]	0	gi|573988897|ref|XP_006672369.1|	Up
TRINITY_DN1408_c1_g1	3.00185	1.55665	0.0843577	0.356532	0	2.894	4.509	63.152	0	3.024	.	.	.
TRINITY_DN2615_c0_g1	3.0012	6.58226	5.54127e-09	5.05892e-07	10.066	10.941	16.11	65.895	144.551	84.355	dynactin subunit 5 [Cordyceps militaris CM01]	2e-95	gi|573993831|ref|XP_006674836.1|	Up
TRINITY_DN2957_c1_g1	3.00079	1.53703	0.0171967	0.130381	1.709	2	1.558	3.489	18.244	25.072	.	.	.
TRINITY_DN4016_c0_g1	2.9983	4.83855	1.95525e-05	0.000636813	34.345	26.891	41.866	124.449	490.2	218.055	.	.	.
TRINITY_DN5230_c0_g1	2.99321	1.98792	0.0167162	0.128498	0.132	0	4.112	9.702	21.187	3.994	C6 transcription factor, putative [Cordyceps militaris CM01]	3e-106	gi|573988843|ref|XP_006672342.1|	Up
TRINITY_DN5979_c0_g1	2.98821	2.75573	0.0739422	0.336744	0	0	2.071	6.595	10.458	0	anthranilate phosphoribosyltransferase [Cordyceps militaris CM01]	0	gi|573982301|ref|XP_006669071.1|	Up
TRINITY_DN1281_c0_g1	2.98057	1.80088	0.00602633	0.0625716	1.143	1.336	2.09	18.639	10.813	9.78	hypothetical protein CCM_02026 [Cordyceps militaris CM01]	4e-17	gi|573978596|ref|XP_006667243.1|	Up
TRINITY_DN7773_c0_g1	2.97976	3.04785	0.00940388	0.0861656	7.979	3.125	4.876	4.081	97.815	27.685	.	.	.
TRINITY_DN1203_c1_g1	2.9789	1.79473	0.00954344	0.0868613	1.369	1.606	2.516	14.032	6.513	26.897	hypothetical protein MAA_08556 [Metarhizium robertsii ARSEF 23]	6e-29	gi|629730786|ref|XP_007824745.1|	Up
TRINITY_DN8750_c0_g3	2.977	2.43178	0.0108101	0.0949841	4.231	4.961	1.297	4.32	25.08	55.221	.	.	.
TRINITY_DN4018_c0_g1	2.97626	0.713572	0.107593	0.406996	0	0	1.916	4.292	0	17.985	.	.	.
TRINITY_DN4040_c1_g1	2.97451	0.717729	0.0681588	0.319659	0	0	2.806	3.154	7.368	22.652	hypothetical protein CCM_07708 [Cordyceps militaris CM01]	5e-82	gi|573989981|ref|XP_006672911.1|	Up
TRINITY_DN5540_c3_g1	2.97301	2.05213	0.00590641	0.0618733	1.634	1.913	0.755	19.155	5.792	9.985	abc transporter [Cordyceps militaris CM01]	0	gi|573990681|ref|XP_006673261.1|	Up
TRINITY_DN8221_c0_g1	2.97194	9.70429	3.54843e-06	0.000144396	142.355	357.521	296.553	569.713	3364.51	2243.99	hypothetical protein CCM_09573 [Cordyceps militaris CM01]	0	gi|573993697|ref|XP_006674769.1|	Up
TRINITY_DN9756_c0_g1	2.96998	1.16587	0.0174939	0.131784	1.596	0	1.461	6.509	13.234	9.746	.	.	.
TRINITY_DN4900_c0_g1	2.96984	3.91072	0.00107866	0.0167749	3.834	1.721	1.355	8.096	38.178	7.92	Major facilitator superfamily transporter [Cordyceps militaris CM01]	0	gi|573987755|ref|XP_006671798.1|	Up
TRINITY_DN1186_c0_g1	2.96535	2.54066	0.00666701	0.0674355	1.983	0.779	2.438	29.707	3.131	9.723	hypothetical protein CCM_03701 [Cordyceps militaris CM01]	1e-18	gi|573981985|ref|XP_006668913.1|	Up
TRINITY_DN2098_c0_g1	2.96394	0.712066	0.0840569	0.356201	0	0	6.125	6.968	57.57	8.342	.	.	.
TRINITY_DN5521_c3_g1	2.96028	1.78819	0.0242401	0.165739	3.4	0	0	16.479	8.047	4.165	.	.	.
TRINITY_DN1000_c0_g2	2.95639	1.74161	0.0541421	0.279936	0	0	1.442	8.994	0	4.12	Polynucleotidyl transferase [Cordyceps militaris CM01]	2e-170	gi|573993109|ref|XP_006674475.1|	Up
TRINITY_DN6346_c0_g1	2.95438	2.96074	0.0146866	0.1172	0	0	12.53	45.373	42.113	18.247	MYND domain protein, putative [Cordyceps militaris CM01]	3e-111	gi|573988667|ref|XP_006672254.1|	Up
TRINITY_DN8780_c0_g1	2.95429	0.750865	0.0808708	0.351409	0	2.673	0	18.629	2.714	2.784	hypothetical protein CCM_08388 [Cordyceps militaris CM01]	9e-17	gi|573991339|ref|XP_006673590.1|	Up
TRINITY_DN1465_c0_g1	2.95364	2.80906	0.0248591	0.168653	3.664	0	0	20.006	3.329	6.779	hypothetical protein CCM_08584 [Cordyceps militaris CM01]	0	gi|573991727|ref|XP_006673784.1|	Up
TRINITY_DN6094_c1_g4	2.95243	1.78015	0.00610374	0.063004	1.445	1.25	1.935	13.678	8.757	13.557	.	.	.
TRINITY_DN3893_c0_g1	2.95087	1.53994	0.0107998	0.0949841	0.831	1.932	0	10.113	4.884	7.075	.	.	.
TRINITY_DN3926_c1_g1	2.94958	2.01975	0.00948841	0.0866248	1.237	2.894	2.264	6.299	32.156	13.58	.	.	.
TRINITY_DN10689_c0_g1	2.94892	0.711307	0.0503027	0.268547	0	0	4.044	9.147	10.719	27.354	.	.	.
TRINITY_DN861_c0_g1	2.94718	5.62784	0.0158911	0.123894	26.101	0.923	5.457	0.803	121.214	126.145	cytochrome P450 3A17 [Cordyceps militaris CM01]	0	gi|573984499|ref|XP_006670170.1|	Up
TRINITY_DN3848_c0_g1	2.94615	0.751974	0.10302	0.398338	0	5.653	0	37.258	0	11.811	.	.	.
TRINITY_DN4495_c0_g1	2.94406	0.714916	0.0671467	0.316513	2.88	0	0	5.917	3.455	21.237	.	.	.
TRINITY_DN4446_c0_g2	2.93995	0.734371	0.190408	0.54462	0	4.048	0	0	1.19	29.716	.	.	.
TRINITY_DN3694_c0_g2	2.93609	3.81369	0.00143072	0.0210159	3.626	3.144	0	17.616	17.263	16.615	Protein kinase-like domain [Cordyceps militaris CM01]	2e-164	gi|573986651|ref|XP_006671246.1|	Up
TRINITY_DN526_c0_g1	2.93503	4.38454	0.000907649	0.0146857	0	2.894	3.145	18.381	14.163	13.671	nuclear segregation protein (Bfr1), putative [Cordyceps militaris CM01]	0	gi|573980629|ref|XP_006668235.1|	Up
TRINITY_DN4016_c1_g1	2.93122	8.9839	1.46036e-06	6.82304e-05	125.82	147.865	160.574	392.741	2153.06	727.68	WSC domain protein [Cordyceps militaris CM01]	0	gi|573979306|ref|XP_006667598.1|	Up
TRINITY_DN8751_c0_g1	2.92983	2.3452	0.0051593	0.055925	1.416	0.827	2.612	3.623	18.452	17.369	tubulin, putative [Cordyceps militaris CM01]	0	gi|573987469|ref|XP_006671655.1|	Up
TRINITY_DN10619_c0_g1	2.92944	0.711519	0.042839	0.243177	3.362	0	0	6.901	16.125	12.382	hypothetical protein BBAD15_g8141 [Beauveria bassiana D1-5]	4e-18	gi|701771862|gb|KGQ06555.1|	Up
TRINITY_DN6950_c0_g1	2.92661	0.725687	0.0692737	0.32257	0	3.346	0	2.915	6.805	20.952	.	.	.
TRINITY_DN282_c1_g1	2.92607	2.19288	0.00533842	0.0574606	6.544	1.923	1.5	16.727	29.161	34.064	arabinan endo-1,5-alpha-L-arabinosidase A [Cordyceps militaris CM01]	2e-64	gi|573981817|ref|XP_006668829.1|	Up
TRINITY_DN4227_c0_g1	2.92261	1.15712	0.0157695	0.123274	0	2.192	1.713	13.391	8.903	11.457	.	.	.
TRINITY_DN4016_c2_g1	2.92252	8.16489	1.05448e-06	5.16108e-05	91.022	112.899	127.019	313.388	1591.49	578.7	WSC domain protein [Cordyceps militaris CM01]	1e-63	gi|573979306|ref|XP_006667598.1|	Up
TRINITY_DN3321_c0_g2	2.92138	1.75216	0.0827061	0.353208	1.596	0	0	3.623	9.821	0	dolichyl glycosyltransferase [Cordyceps militaris CM01]	0	gi|573977724|ref|XP_006666807.1|	Up
TRINITY_DN1542_c0_g1	2.91965	2.81996	0.00336622	0.0402394	1.851	2.173	0.851	16.985	3.82	16.421	Terpenoid synthase [Cordyceps militaris CM01]	0	gi|573982819|ref|XP_006669330.1|	Up
TRINITY_DN4097_c0_g1	2.91902	2.35368	0.0126543	0.105273	1.738	0.01	0	4.559	6.053	3.161	.	.	.
TRINITY_DN4431_c0_g1	2.91856	1.4479	0.0729098	0.333248	0.179	0	1.964	7.628	10.134	0	.	.	.
TRINITY_DN3665_c1_g1	2.91505	0.698461	0.0566089	0.286459	0	0	4.383	19.881	11.668	17.837	Pumilio-family RNA binding repeat protein [Cordyceps militaris CM01]	4e-69	gi|573983727|ref|XP_006669784.1|	Up
TRINITY_DN7827_c0_g1	2.91286	0.703965	0.0744265	0.338424	2.597	0	0	7.981	15.499	3.184	.	.	.
TRINITY_DN6957_c0_g1	2.91259	0.697329	0.0562227	0.285653	0	0	5.099	23.169	20.435	13.865	.	.	.
TRINITY_DN202_c0_g1	2.91259	0.697329	0.0562211	0.285653	0	0	2.351	10.552	9.226	6.311	RNase3 domain protein [Cordyceps militaris CM01]	2e-88	gi|573993067|ref|XP_006674454.1|	Up
TRINITY_DN7012_c0_g1	2.91228	0.703204	0.110383	0.412591	2.54	0	0	10.428	0	15.6	.	.	.
TRINITY_DN2657_c1_g1	2.91192	1.72475	0.0444004	0.248439	3.928	0	1.2	1.338	9.31	32.044	sugar transporter, putative [Cordyceps militaris CM01]	2e-62	gi|573991759|ref|XP_006673800.1|	Up
TRINITY_DN7701_c1_g1	2.91003	1.18306	0.053695	0.278928	0	5.23	0	4.559	31.853	5.455	.	.	.
TRINITY_DN10315_c0_g1	2.90855	3.37499	0.000287873	0.00585042	3.938	3.067	3.619	18.715	30.966	31.257	Major facilitator superfamily transporter [Cordyceps militaris CM01]	1e-39	gi|573990709|ref|XP_006673275.1|	Up
TRINITY_DN2957_c0_g1	2.9083	3.97453	0.000729129	0.012294	2.096	2.807	2.758	5.496	14.852	37.408	C6 transcription factor, putative [Cordyceps militaris CM01]	0	gi|573978668|ref|XP_006667279.1|	Up
TRINITY_DN5647_c1_g1	2.90747	3.39946	0.00382744	0.0442226	1.747	0	2.303	17.807	8.235	5.112	ATP-binding cassette transporter, putative [Cordyceps militaris CM01]	1e-74	gi|573976804|ref|XP_006666347.1|	Up
TRINITY_DN4644_c1_g1	2.90687	2.00363	0.00571448	0.0605467	1.823	2.134	0.832	18.553	9.685	8.901	integral membrane protein [Cordyceps militaris CM01]	8e-70	gi|573990015|ref|XP_006672928.1|	Up
TRINITY_DN11549_c0_g1	2.90515	7.16961	2.06512e-05	0.000664222	129.814	77.624	114.306	1201.24	1060.39	138.253	.	.	.
TRINITY_DN1536_c0_g1	2.90431	0.69317	0.070149	0.324885	0	0	2.97	16.737	3.914	12.017	glutamyl-tRNA(Gln) amidotransferase [Cordyceps militaris CM01]	1e-60	gi|573975300|ref|XP_006665595.1|	Up
TRINITY_DN2546_c2_g1	2.90352	1.80551	0.0142607	0.114901	1.53	5.403	0	28.226	7.285	16.912	MFS gliotoxin efflux transporter GliA [Cordyceps militaris CM01]	9e-66	gi|573992753|ref|XP_006674297.1|	Up
TRINITY_DN2544_c0_g1	2.89925	0.712847	0.0605461	0.298455	0	5.538	0	14.49	11.334	23.12	.	.	.
TRINITY_DN4753_c0_g4	2.8981	1.9425	0.0375087	0.222977	2.059	0	0.977	8.545	0	18.567	Protein kinase-like domain [Cordyceps militaris CM01]	0	gi|573989801|ref|XP_006672821.1|	Up
TRINITY_DN1342_c0_g1	2.89749	0.713979	0.0565044	0.286176	0	2.442	0	6.395	2.484	12.758	.	.	.
TRINITY_DN3325_c0_g1	2.89748	0.713979	0.056524	0.286194	0	3.528	0	9.243	3.601	18.441	hypothetical protein CCM_03671 [Cordyceps militaris CM01]	3e-43	gi|573981925|ref|XP_006668883.1|	Up
TRINITY_DN4375_c0_g1	2.89684	0.689773	0.10511	0.40122	0	0	2.283	12.827	11.961	0	.	.	.
TRINITY_DN11521_c0_g1	2.89419	0.718893	0.130806	0.45406	0	6.182	0	5.391	50.692	0	.	.	.
TRINITY_DN3241_c0_g1	2.89082	1.71503	0.0165799	0.12785	0.822	0	2.264	16.765	1.941	7.041	.	.	.
TRINITY_DN317_c0_g1	2.8908	0.694518	0.0621365	0.302109	2.654	0	0	13.63	6.356	6.528	.	.	.
TRINITY_DN3519_c1_g1	2.88804	0.686746	0.0775808	0.346508	0	0	2.061	13.821	2.682	5.512	hypothetical protein BBA_04359 [Beauveria bassiana ARSEF 2860]	2e-27	gi|667651693|ref|XP_008597678.1|	Up
TRINITY_DN10218_c0_g1	2.88756	4.69094	0.00252892	0.0324497	2.351	13.094	10.285	19.795	18.066	151.867	aldolase [Cordyceps militaris CM01]	0	gi|573974836|ref|XP_006665363.1|	Up
TRINITY_DN4710_c1_g1	2.8863	5.99787	0.000152794	0.00343397	21.445	22.036	14.426	19.184	122.153	282.543	Intradiol ring-cleavage dioxygenase, core [Cordyceps militaris CM01]	0	gi|573985235|ref|XP_006670538.1|	Up
TRINITY_DN10460_c0_g1	2.88626	0.70945	0.0752649	0.340112	0	2.692	0	7.035	13.651	2.807	.	.	.
TRINITY_DN3243_c0_g2	2.88424	7.97772	0.00131224	0.0195284	32.107	66.895	51.599	15.618	789.969	291.752	isoflavone reductase family protein [Cordyceps militaris CM01]	0	gi|573988897|ref|XP_006672369.1|	Up
TRINITY_DN5372_c0_g1	2.8823	6.51275	0.000505079	0.00914645	21.323	9.941	13.662	260.244	51.59	13.763	epoxide hydrolase [Cordyceps militaris CM01]	0	gi|573985019|ref|XP_006670430.1|	Up
TRINITY_DN4601_c0_g2	2.88059	3.12506	0.00714846	0.0708015	2.38	2.663	1.335	36.962	6.033	3.606	SNF7 family protein [Cordyceps militaris CM01]	9e-120	gi|573979440|ref|XP_006667665.1|	Up
TRINITY_DN5380_c0_g1	2.88021	5.89435	0.00202354	0.0270933	3.532	0	6.047	41.378	16.073	13.158	importin 11, putative [Cordyceps militaris CM01]	0	gi|573974764|ref|XP_006665327.1|	Up
TRINITY_DN8637_c0_g1	2.87884	4.71918	1.41777e-05	0.000482262	14.75	13.825	15.345	53.182	124.512	145.591	hypothetical protein CCM_08907 [Cordyceps militaris CM01]	6e-71	gi|573992371|ref|XP_006674106.1|	Up
TRINITY_DN9543_c0_g1	2.87771	2.9543	0.00974058	0.0881958	2.927	1.711	4.035	5.228	7.786	52.802	.	.	.
TRINITY_DN10413_c0_g1	2.87394	1.75839	0.00882189	0.0824624	2.663	3.125	0	14.949	15.781	13.032	hypothetical protein CCM_06158 [Cordyceps militaris CM01]	7e-26	gi|573986883|ref|XP_006671362.1|	Up
TRINITY_DN88_c0_g1	2.8718	0.681454	0.120836	0.434517	0	0	4.267	33.817	0	11.56	DUF572 domain-containing protein [Cordyceps militaris CM01]	1e-22	gi|573982601|ref|XP_006669221.1|	Up
TRINITY_DN675_c1_g1	2.86905	0.700004	0.0627618	0.304645	0	5.865	0	25.578	12.013	12.245	.	.	.
TRINITY_DN934_c1_g1	2.86466	1.10887	0.0202875	0.146864	2.295	0	2.1	11.766	16.449	11.275	RNase3 domain protein [Cordyceps militaris CM01]	1e-96	gi|573993067|ref|XP_006674454.1|	Up
TRINITY_DN6691_c0_g1	2.86271	3.27603	0.00341761	0.040641	3.636	6.384	4.17	6.49	38.669	58.884	hypothetical protein CCM_06090 [Cordyceps militaris CM01]	1e-58	gi|573986747|ref|XP_006671294.1|	Up
TRINITY_DN5449_c0_g1	2.8622	4.70193	0.000535964	0.00957872	2.748	4.672	3.028	22.166	4.978	48.819	Zinc finger domain-containing protein, C2H2-like protein [Cordyceps militaris CM01]	0	gi|573986189|ref|XP_006671015.1|	Up
TRINITY_DN4491_c0_g1	2.85963	1.71163	0.0142017	0.114576	1.52	1.779	2.777	6.194	16.198	25.996	Acyl-CoA oxidase [Cordyceps militaris CM01]	5e-86	gi|573975910|ref|XP_006665900.1|	Up
TRINITY_DN3851_c0_g1	2.85917	6.54364	0.000257178	0.00531864	3.749	16.863	12.356	11.059	117.3	107.795	hypothetical protein CCM_05677 [Cordyceps militaris CM01]	0	gi|573985927|ref|XP_006670884.1|	Up
TRINITY_DN4389_c2_g1	2.85704	1.434	0.0181677	0.135355	4.372	0	2.003	13.449	13.046	26.829	hypothetical protein CCM_02407 [Cordyceps militaris CM01]	3e-36	gi|573979354|ref|XP_006667622.1|	Up
TRINITY_DN5483_c0_g1	2.85688	5.64017	1.35451e-08	1.1365e-06	8.669	6.268	6.928	67.09	43.198	46.195	MFS multidrug transporter, putative [Cordyceps militaris CM01]	0	gi|573985253|ref|XP_006670547.1|	Up
TRINITY_DN848_c1_g1	2.85662	1.42736	0.0161785	0.12558	1.492	0	2.738	10.667	8.85	16.433	asparaginyl-tRNA synthetase [Cordyceps militaris CM01]	5e-117	gi|573992103|ref|XP_006673972.1|	Up
TRINITY_DN9389_c0_g1	2.8542	2.14404	0.0182588	0.135804	2.993	0.875	0.687	14.481	1.764	18.282	.	.	.
TRINITY_DN5715_c0_g1	2.8539	2.92936	0.0574198	0.28849	2.946	0	2.1	30.797	5.584	0	Hsp90 co-chaperone Cdc37 [Cordyceps militaris CM01]	0	gi|573978312|ref|XP_006667101.1|	Up
TRINITY_DN2825_c0_g1	2.85262	0.682804	0.0963429	0.381389	2.38	0	0	17.09	2.849	2.921	Lipase, secreted [Cordyceps militaris CM01]	1e-16	gi|573975068|ref|XP_006665479.1|	Up
TRINITY_DN897_c0_g1	2.84697	2.85589	0.00230214	0.0301142	1.671	1.471	1.538	16.593	3.935	13.785	abc transporter [Cordyceps militaris CM01]	0	gi|573990681|ref|XP_006673261.1|	Up
TRINITY_DN6291_c0_g2	2.83999	5.61783	0.0353088	0.214639	29.378	22.612	20.812	505.873	13.892	0	hypothetical protein CCM_08669 [Cordyceps militaris CM01]	2e-57	gi|573991897|ref|XP_006673869.1|	Up
TRINITY_DN253_c0_g1	2.838	3.23149	0.000490268	0.00897042	1.926	2.259	3.106	14.729	15.916	22.39	hypothetical protein BBAD15_g4609 [Beauveria bassiana D1-5]	3e-11	gi|701776103|gb|KGQ10042.1|	Up
TRINITY_DN9647_c0_g1	2.83765	1.11001	0.0198556	0.144808	0	1.99	1.548	10.38	8.047	10.362	.	.	.
TRINITY_DN4043_c1_g1	2.83616	3.7052	0.00187969	0.0256944	0.633	3.682	2.603	5.764	17.033	26.498	endothiapepsin precursor [Cordyceps militaris CM01]	0	gi|573989253|ref|XP_006672547.1|	Up
TRINITY_DN1842_c0_g1	2.83578	2.74431	0.00317004	0.0386013	1.653	2.577	1.519	8.966	8.433	24.193	ankyrin repeat-containing domain [Cordyceps militaris CM01]	9e-110	gi|573975794|ref|XP_006665842.1|	Up
TRINITY_DN2313_c0_g1	2.83421	0.648664	0.151897	0.487065	0	0	2.138	2.399	0	20.085	MFS transporter, putative [Cordyceps militaris CM01]	6e-86	gi|573986627|ref|XP_006671234.1|	Up
TRINITY_DN3966_c0_g1	2.83321	1.10804	0.0217669	0.153856	0	2.49	1.945	13.047	15.186	7.806	LysM domain-containing protein [Cordyceps militaris CM01]	5e-98	gi|573975738|ref|XP_006665814.1|	Up
[truncated: 15,621 more rows]
[truncated: 1 more columns]
